# Supplementary material for: Synergistic or antagonistic antioxidant combinations – a case study exploring flavonoid-nitroxide hybrids
Source: Royal Society of Chemistry journal article supplement (doi:10.1039/d2ob02101c), 2023-01-01
Supplement: d2ob02101c1.pdf [file d2ob02101c1.pdf]

## Supplementary Information

### Synergistic or Antagonistic Antioxidant Combinations - A Case Study Exploring Flavonoid-Nitroxides Hybrids

Astrid C. R. Larin, Michael C. Pfrunder, Kathleen M. Mullen, Sandra Wiedbrauk, Nathan R. Boase, and Kathryn E. Fairfull-Smith

#### Contents

|                                                                                                                                               |    |
|-----------------------------------------------------------------------------------------------------------------------------------------------|----|
| Synthesis.....                                                                                                                                | 2  |
| 2-Acetylphenyl 2-methoxy-1,1,3,3-tetramethylisoindoline-5-carboxylate (12).....                                                               | 2  |
| 1-(2-Hydroxyphenyl)-3-(2-methoxy-1,1,3,3-tetramethylisoindolin-5-yl)propane-1,3-dione (13).....                                               | 6  |
| 2-(2-Methoxy-1,1,3,3-tetramethylisoindolin-5-yl)-4H-chromen-4-one (14).....                                                                   | 10 |
| 2-(2-Methoxy-1,1,3,3-tetramethylisoindolin-5-yl)-3-(2-methoxy-1,1,3,3-tetramethylisoindoline-5-carbonyl)-4H-chromen-4-one (15).....           | 14 |
| 2-(1,1,3,3-Tetramethylisoindolin-2-oxyl)-4H-chromen-4-one (6).....                                                                            | 18 |
| 2-(1,1,3,3-Tetramethylisoindolin-2-oxyl)-3-(1,1,3,3-tetramethylisoindolin-2-oxyl-5-carbonyl)-4H-chromen-4-one (8).....                        | 22 |
| 2-Acetyl-3-hydroxyphenyl 2-methoxy-1,1,3,3-tetramethylisoindoline-5-carboxylate (17).....                                                     | 26 |
| 5-Hydroxy-2-(2-methoxy-1,1,3,3-tetramethylisoindolin-5-yl)-4H-chromen-4-one (18).....                                                         | 30 |
| 2-Acetyl-1,3-phenylene bis(2-methoxy-1,1,3,3-tetramethylisoindoline-5-carboxylate) (19).....                                                  | 34 |
| 5-Hydroxy-2-(2-methoxy-1,1,3,3-tetramethylisoindolin-5-yl)-3-(2-methoxy-1,1,3,3-tetramethylisoindoline-5-carbonyl)-4H-chromen-4-one (20)..... | 38 |
| 5-Hydroxy-2-(1,1,3,3-tetramethylisoindolin-2-oxyl)-4H-chromen-4-one (7).....                                                                  | 42 |
| 5-Hydroxy-2-(1,1,3,3-tetramethylisoindolin-2-oxyl)-3-(1,1,3,3-tetramethylisoindolin-2-oxyl-5-carbonyl)-4H-chromen-4-one (9).....              | 47 |
| Single Crystal X-ray Diffraction Experimental.....                                                                                            | 52 |
| Cyclic voltammograms of 5-OH Flavone and 5-OH-3-Benzoyl flavone series.....                                                                   | 54 |
| Oxygen Radical Antioxidant Capacity (ORAC) Data.....                                                                                          | 55 |
| ORAC assay followed by EPR and fluorescence spectroscopy.....                                                                                 | 58 |
| EPR spectra of compounds (1, 6 and 7) in various solvents.....                                                                                | 59 |
| References.....                                                                                                                               | 60 |

# Synthesis

## 2-Acetylphenyl 2-methoxy-1,1,3,3-tetramethylisoindoline-5-carboxylate (**12**)

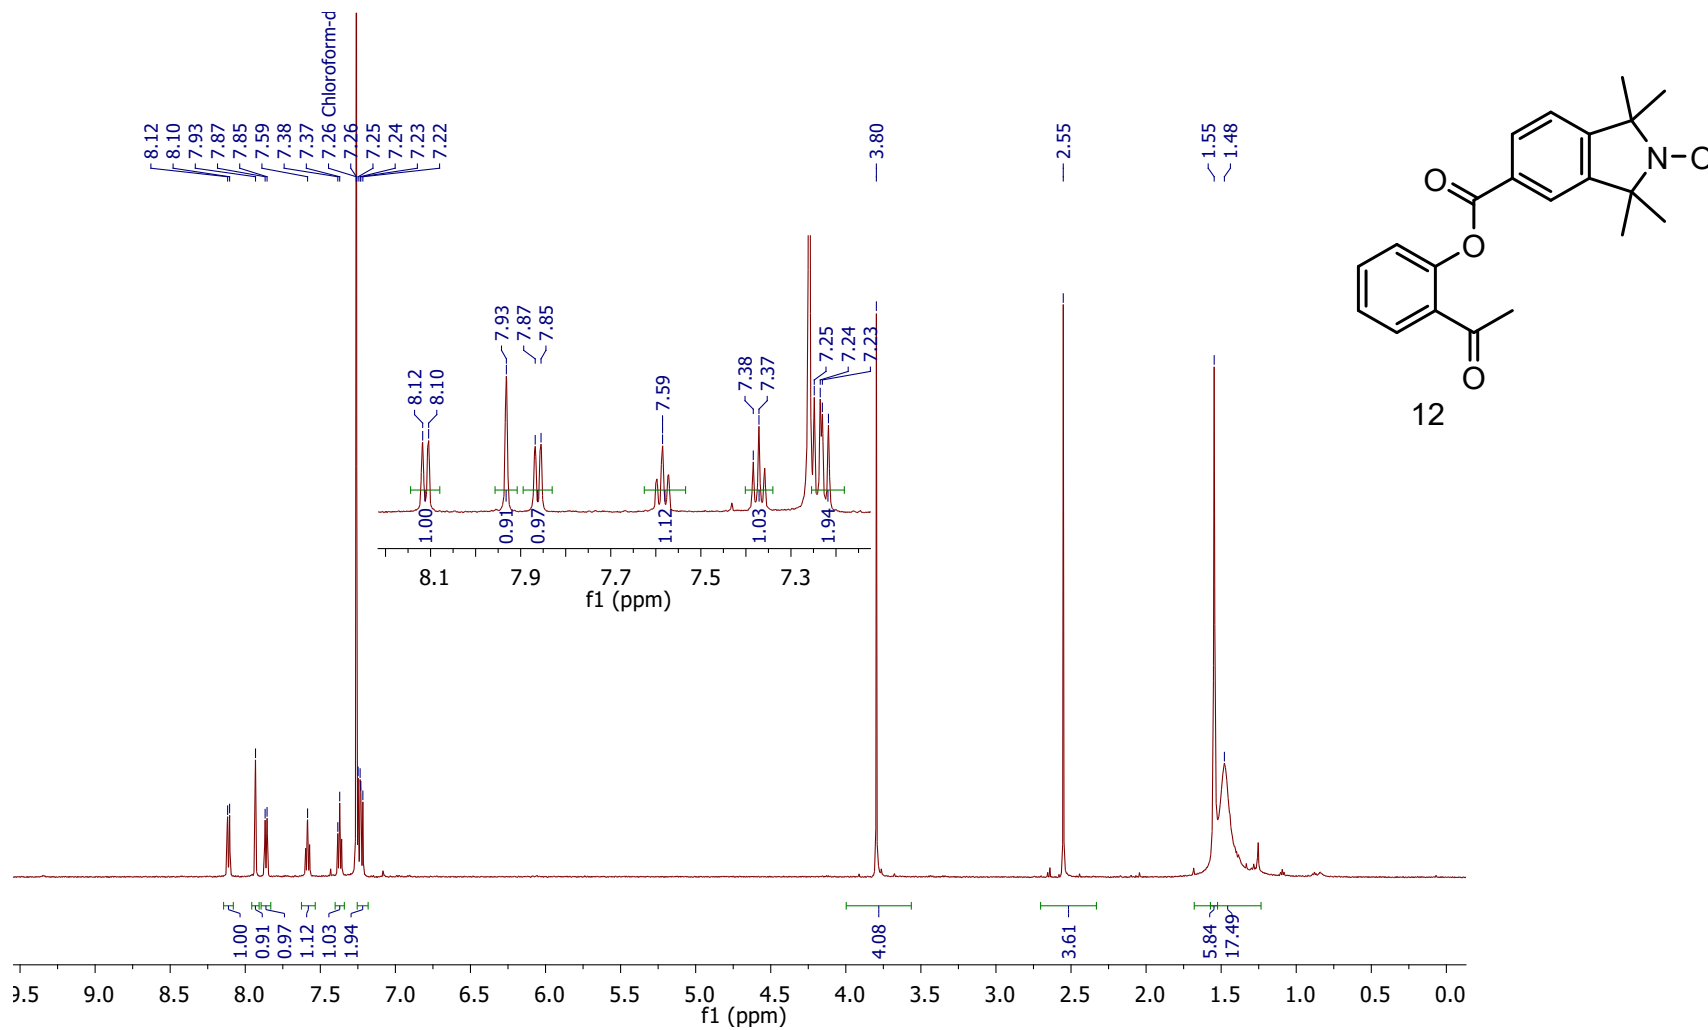

Figure S1: <sup>1</sup>H NMR spectrum of **12** (CDCl<sub>3</sub>, 600 MHz).

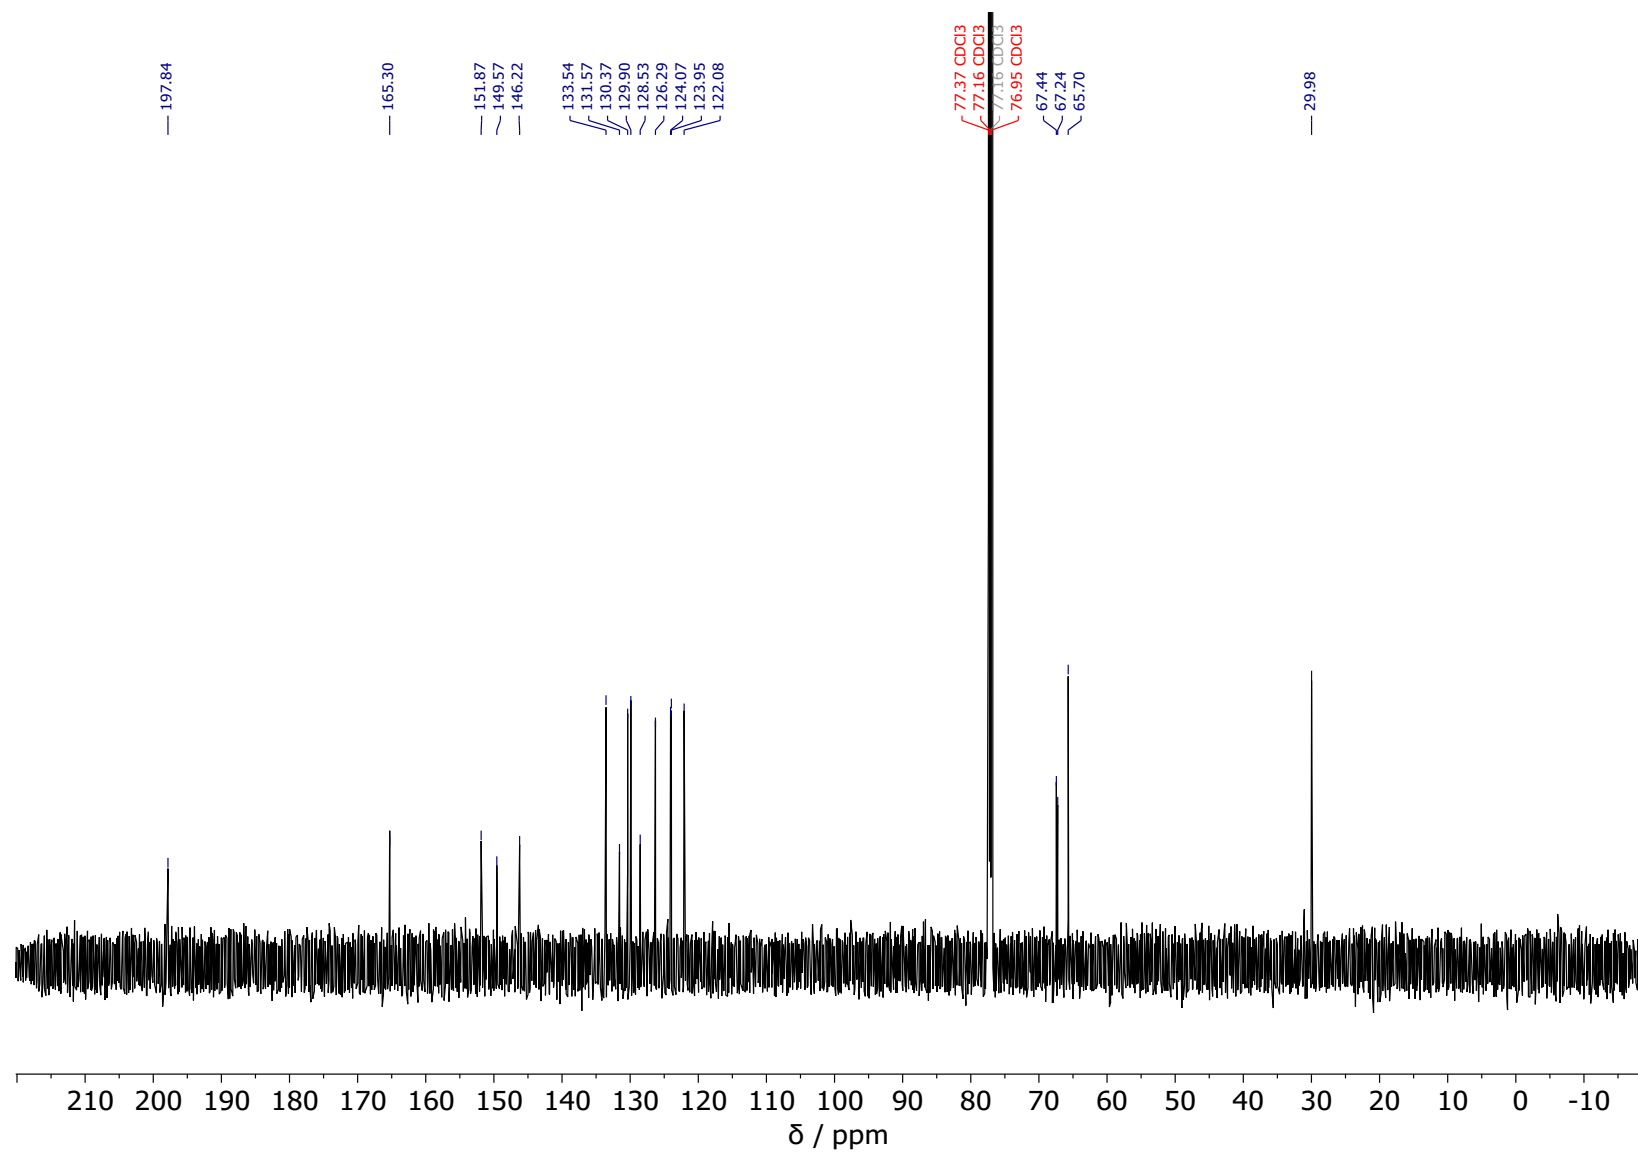

Figure S2:  $^{13}\text{C}$  NMR spectrum of **12** ( $\text{CDCl}_3$ , 151 MHz)

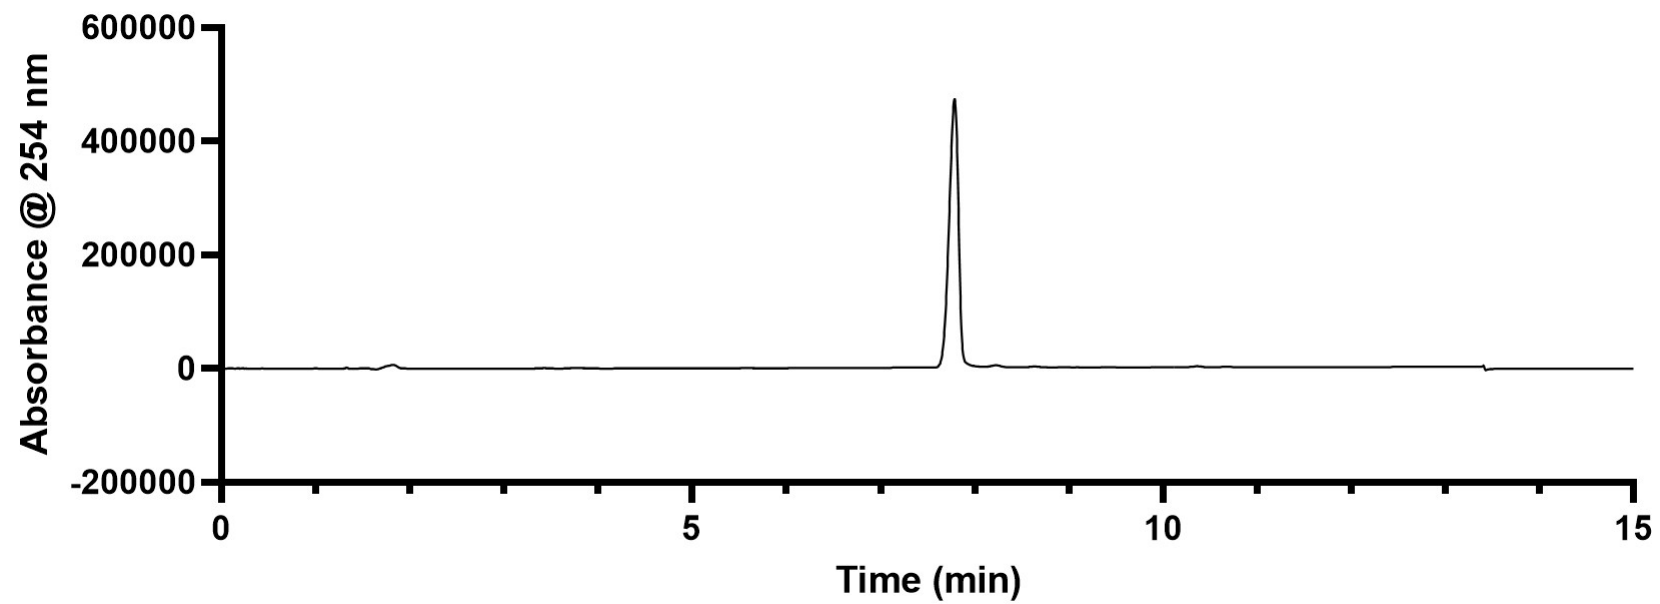

Figure S3: LC trace (215 nm detector wavelength) of **12**. The gradient was altered for this compound to ACN:H<sub>2</sub>O (0.1% formic acid) 10:90 – 80:20.

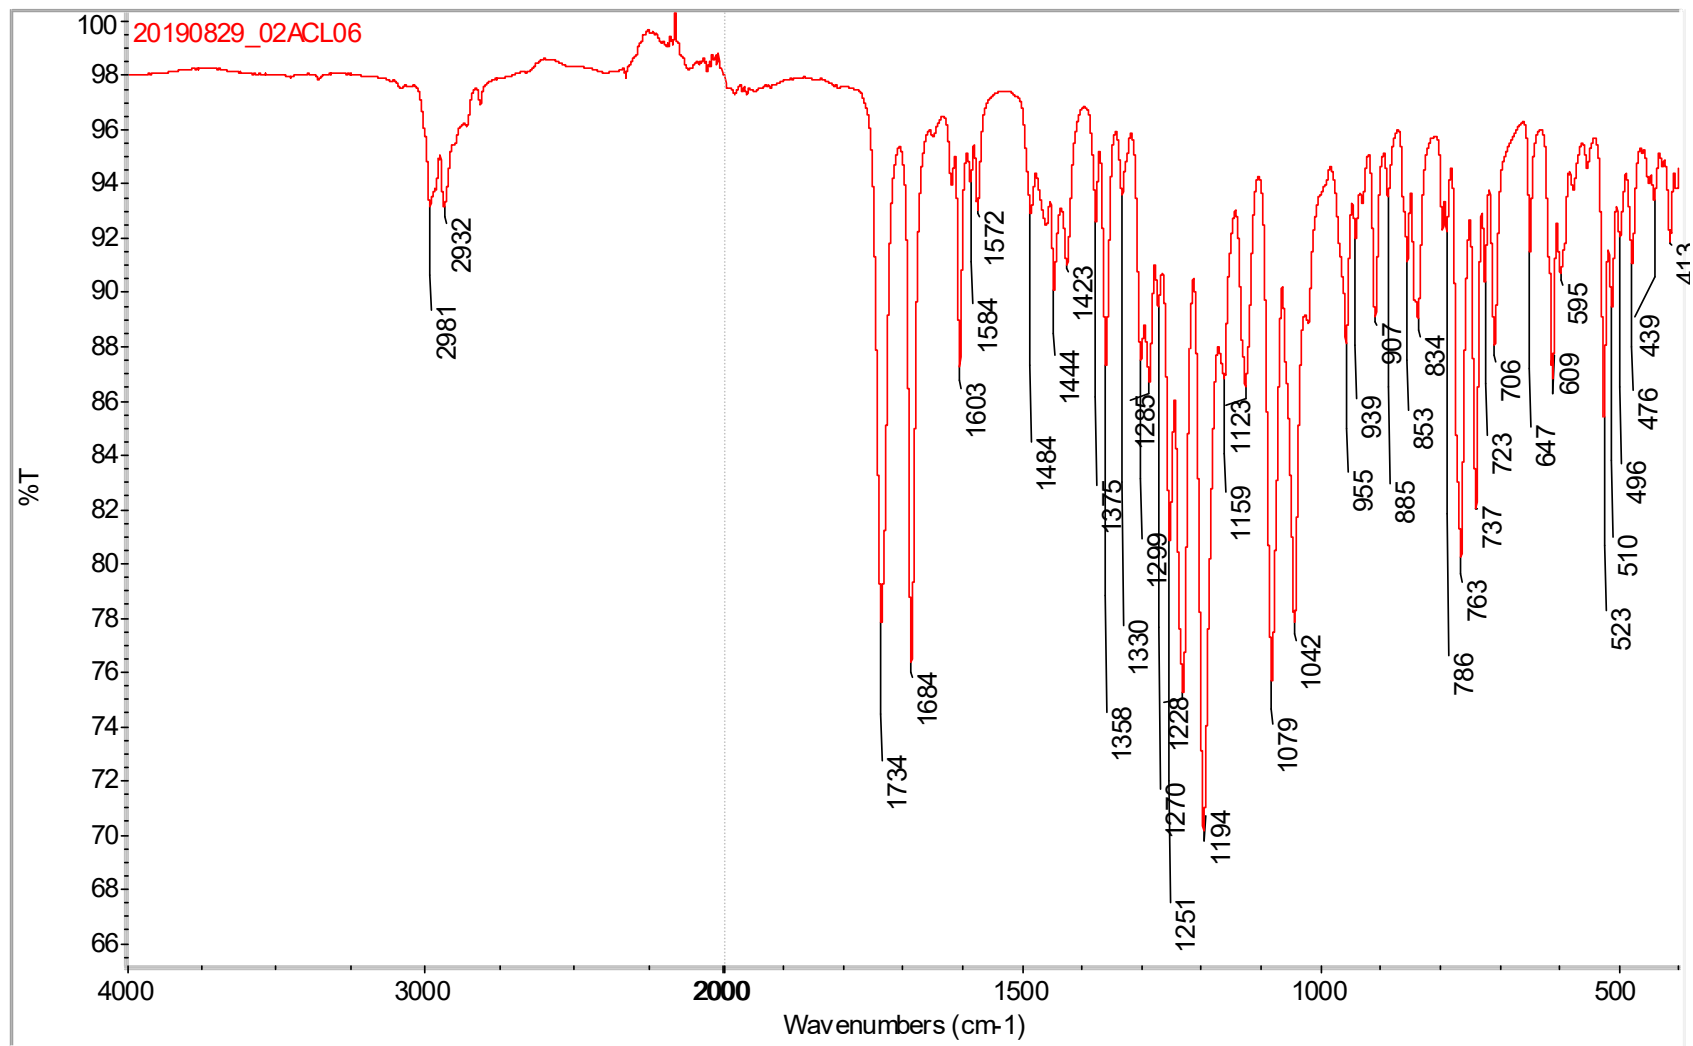

Figure S4: FT-IR spectrum of **12**.

1-(2-Hydroxyphenyl)-3-(2-methoxy-1,1,3,3-tetramethylisoindolin-5-yl)propane-1,3-dione (13)

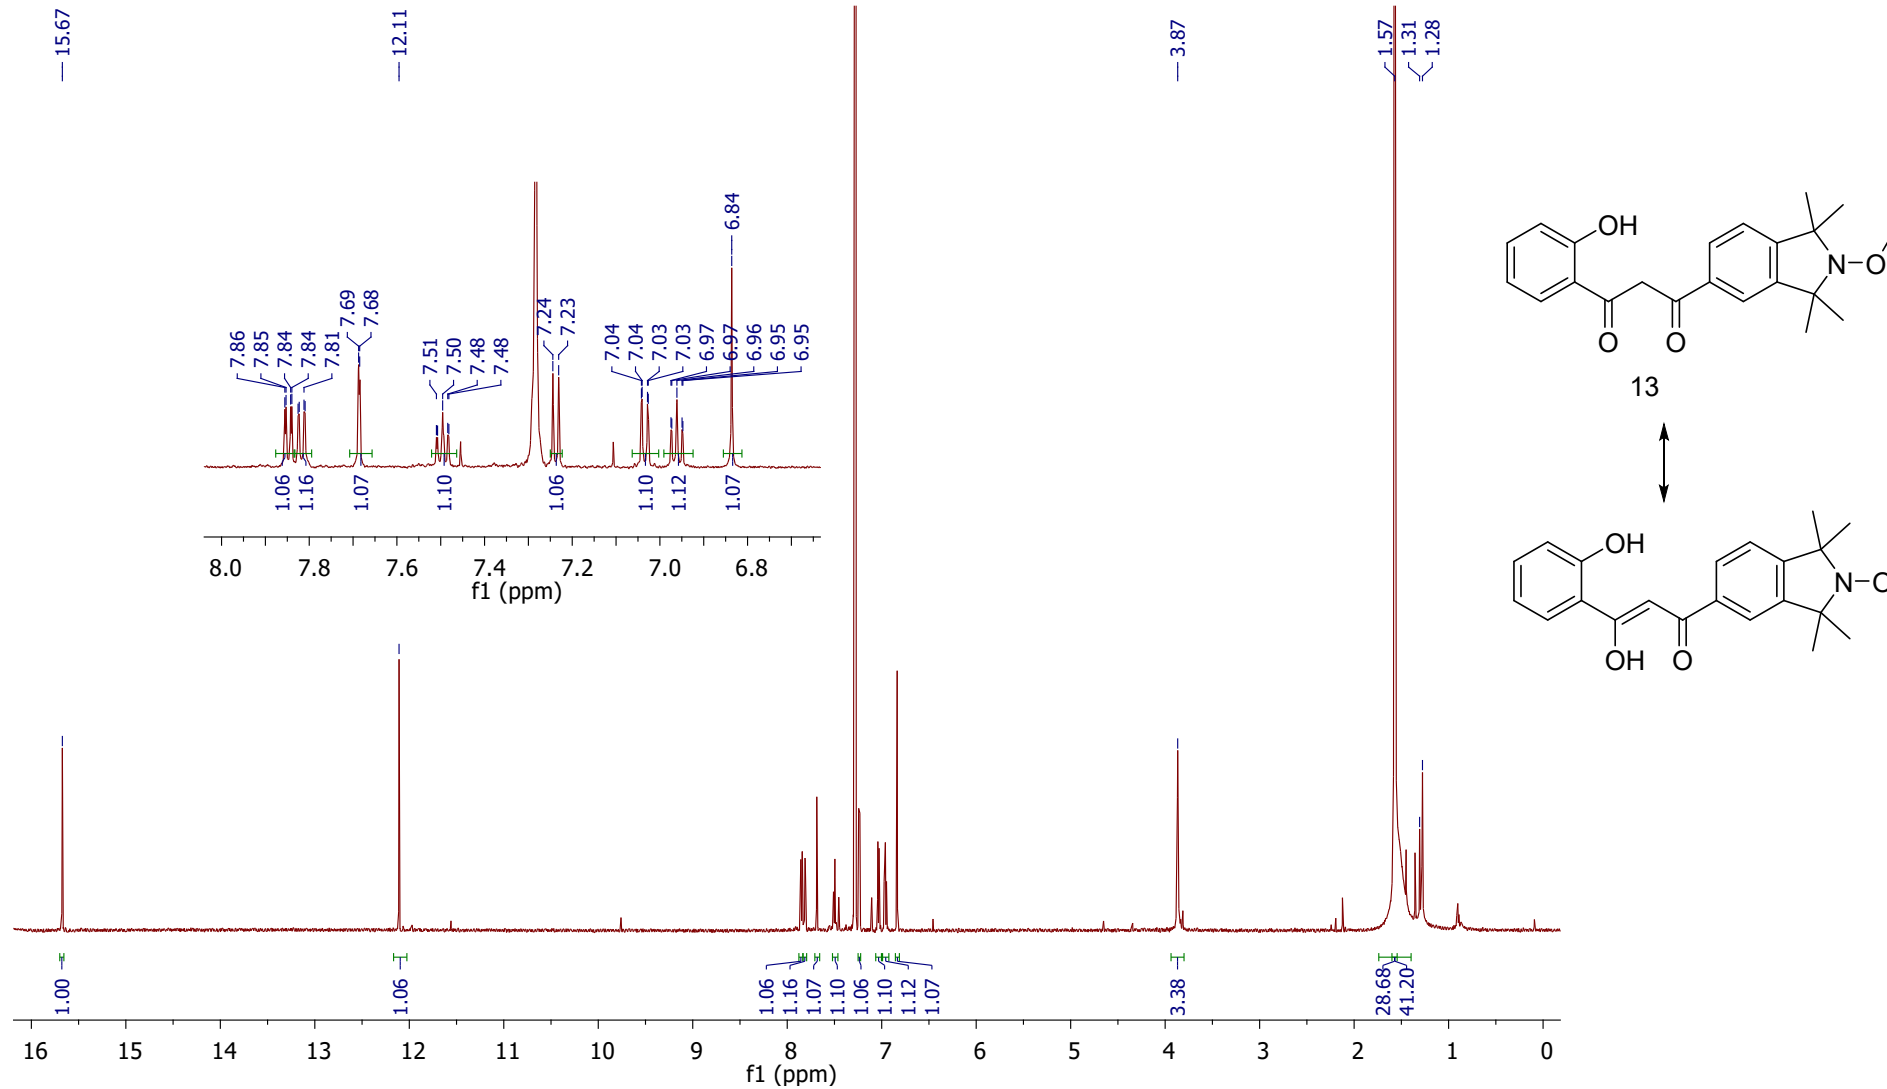

Figure S5: <sup>1</sup>H NMR spectrum of **13** (CDCl<sub>3</sub>, 600 MHz).

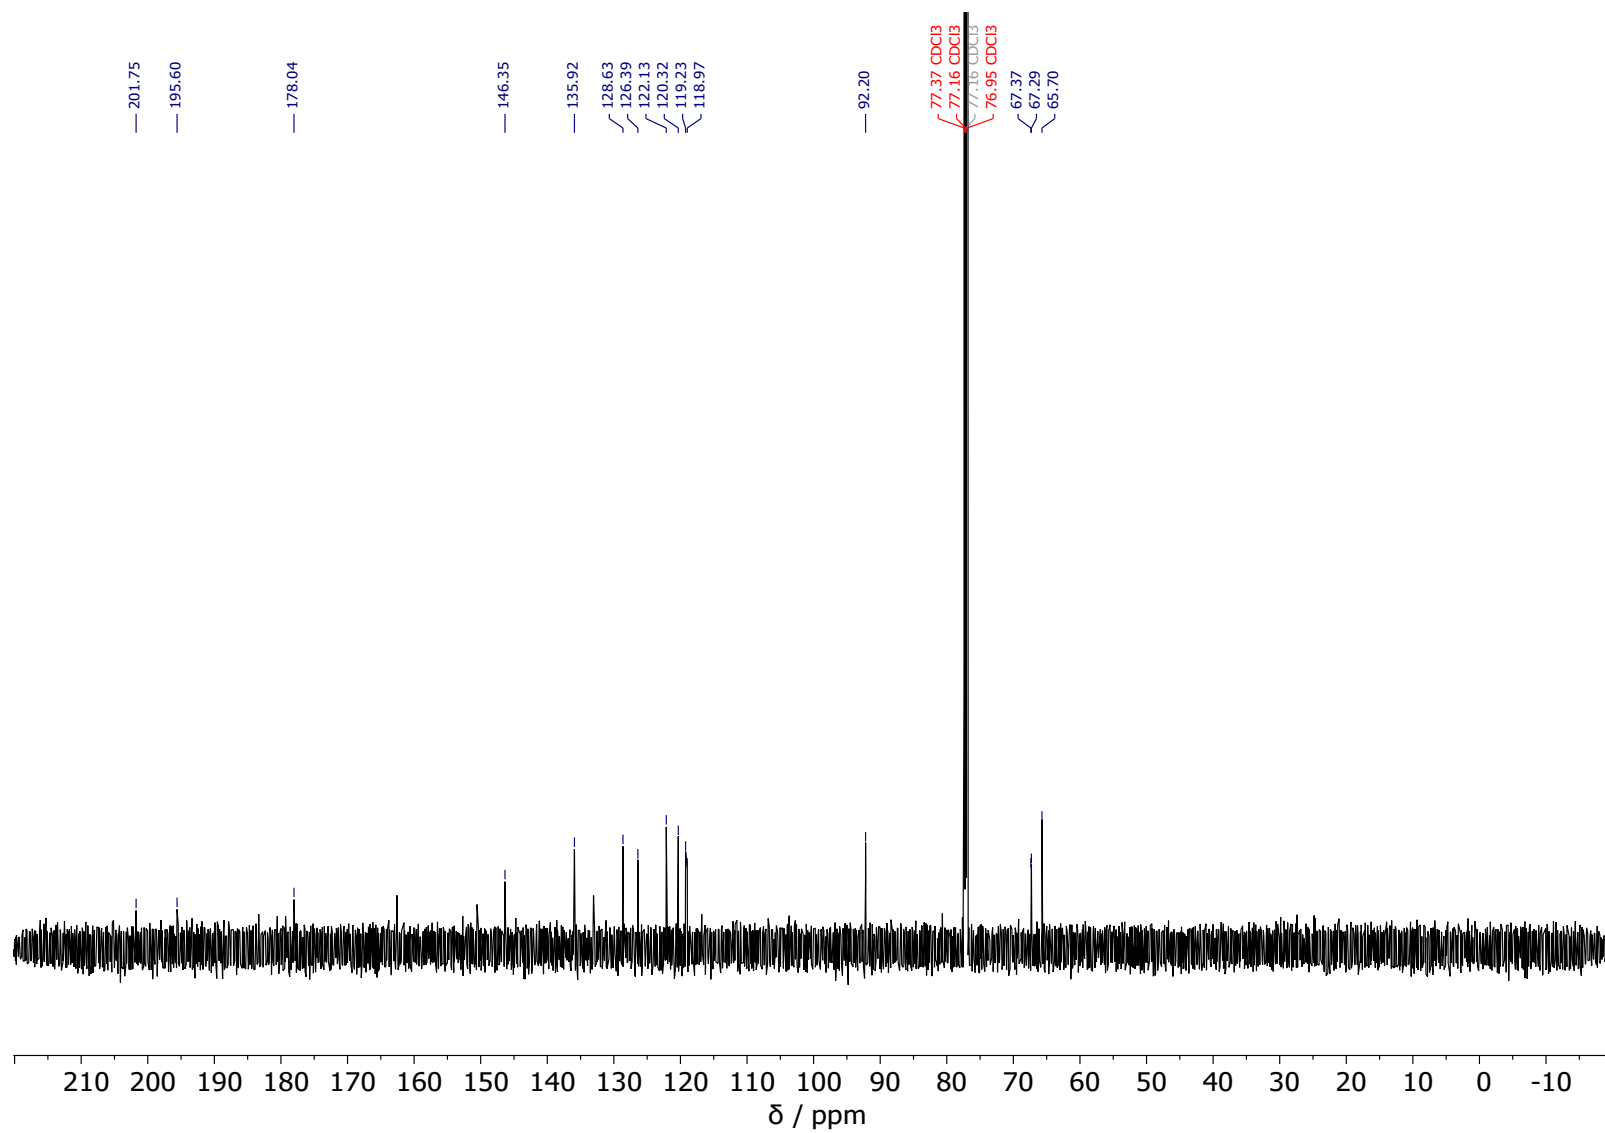

Figure S6:  $^{13}\text{C}$  NMR spectrum of **13** ( $\text{CDCl}_3$ , 151 MHz).

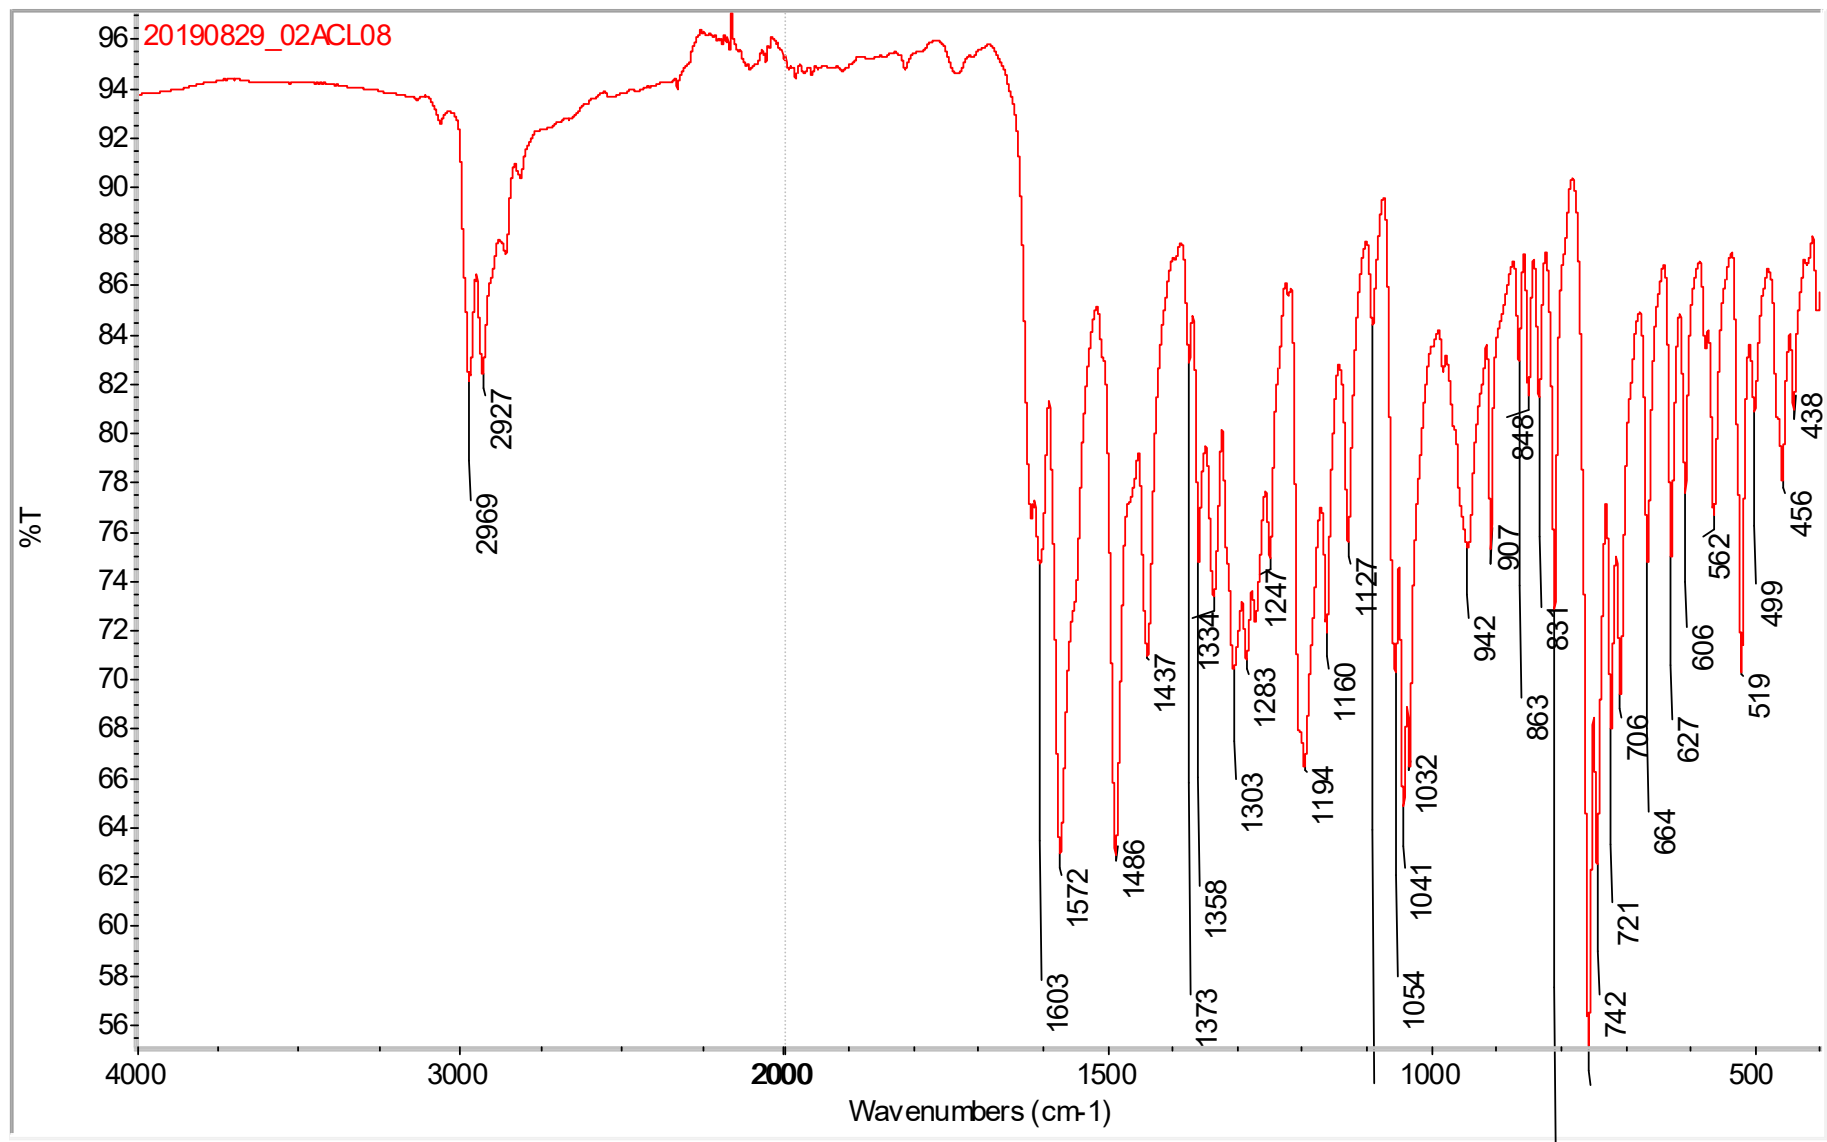

Figure S7: FT-IR Spectrum of **13**



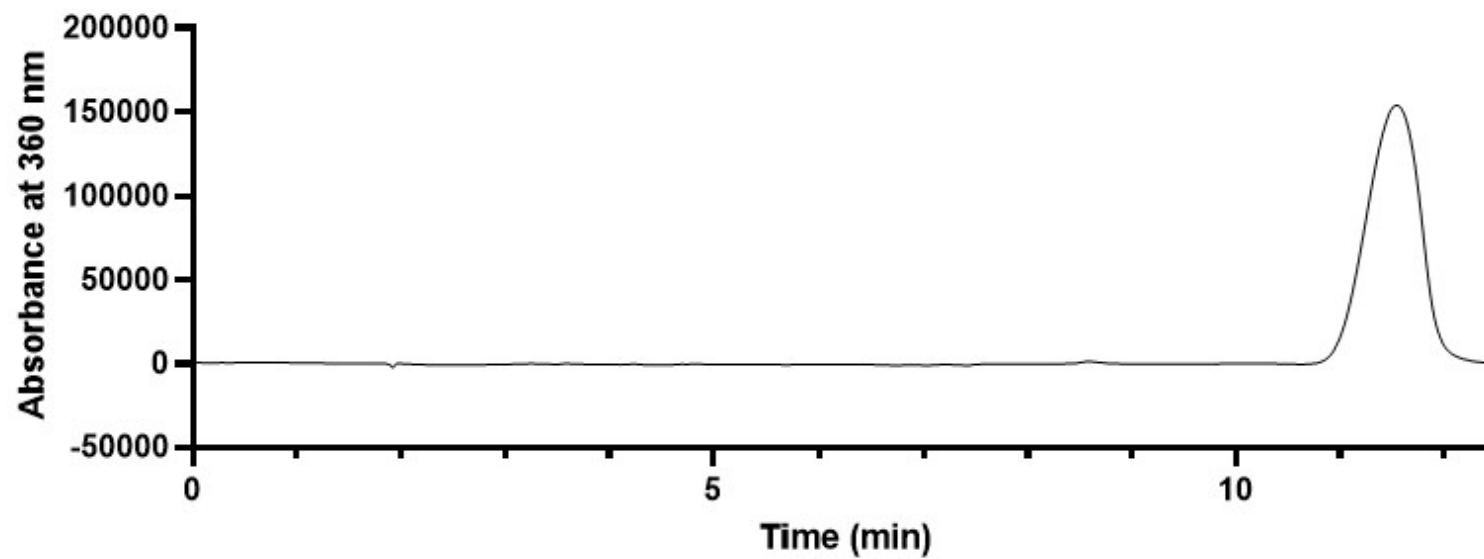

Figure S8: LC trace (360 nm detector wavelength) of **13**. The gradient was altered for this compound to ACN:H<sub>2</sub>O (0.1% formic acid) 10:90 – 80:20.

2-(2-Methoxy-1,1,3,3-tetramethylisoindolin-5-yl)-4H-chrome n-4-one (14)

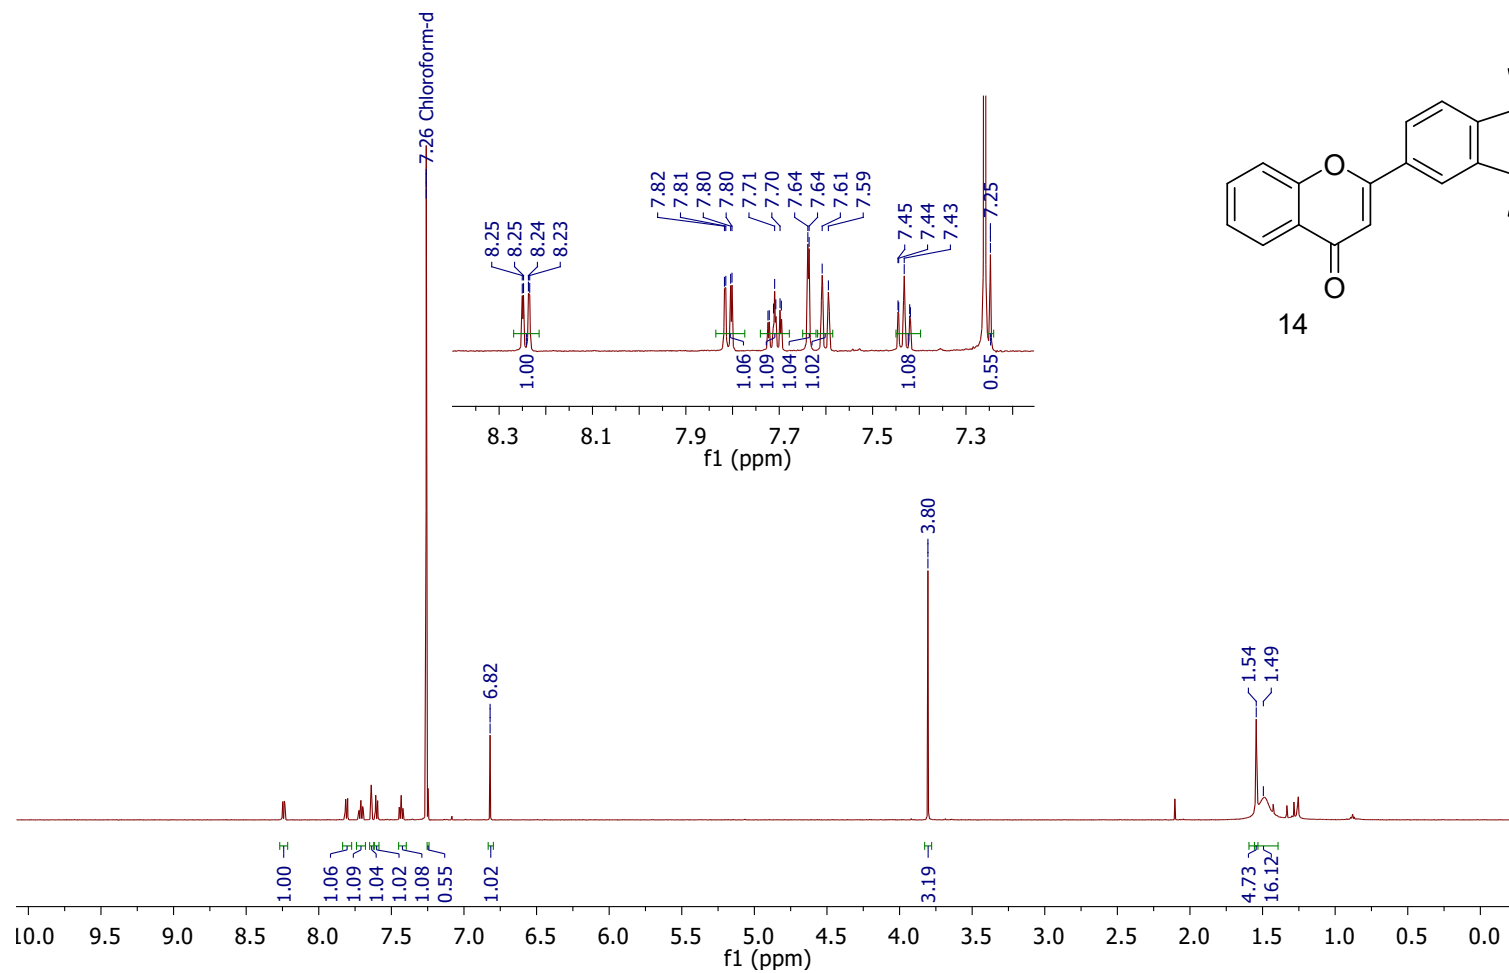

Figure S9: <sup>1</sup>H NMR Spectrum of **14** (CDCl<sub>3</sub>, 600 MHz).

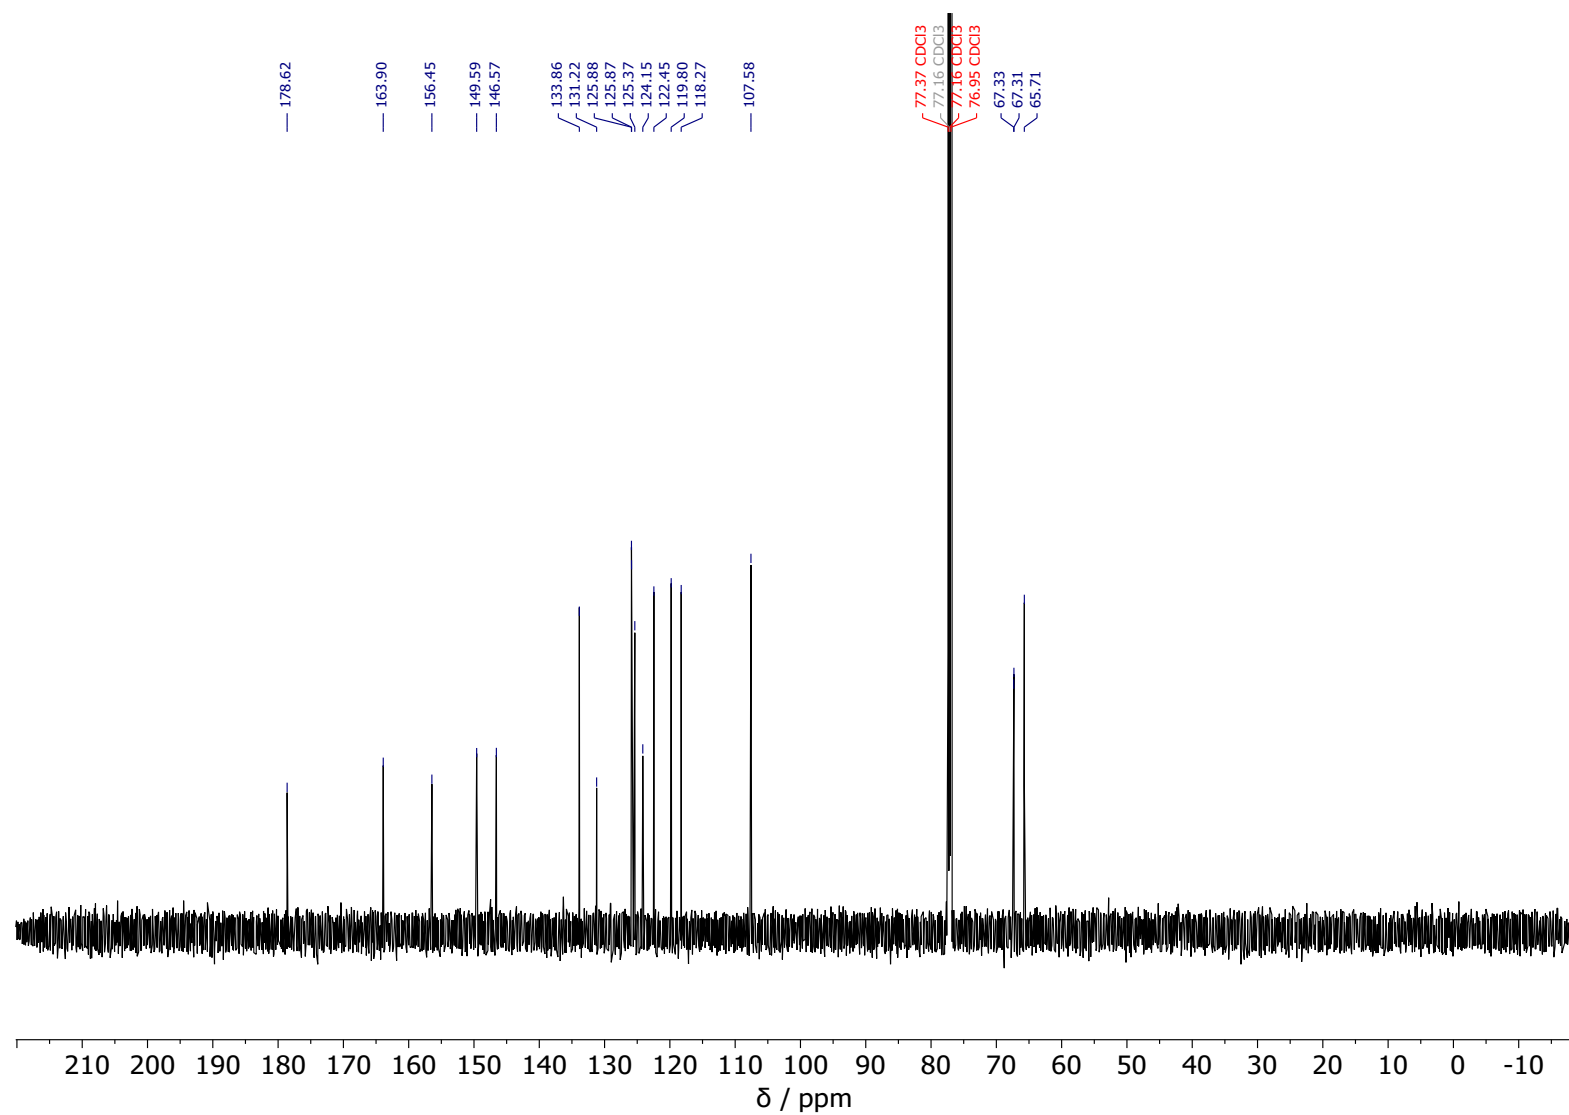

Figure S10:  $^{13}\text{C}$  NMR spectrum of **14** ( $\text{CDCl}_3$ , 151 MHz).

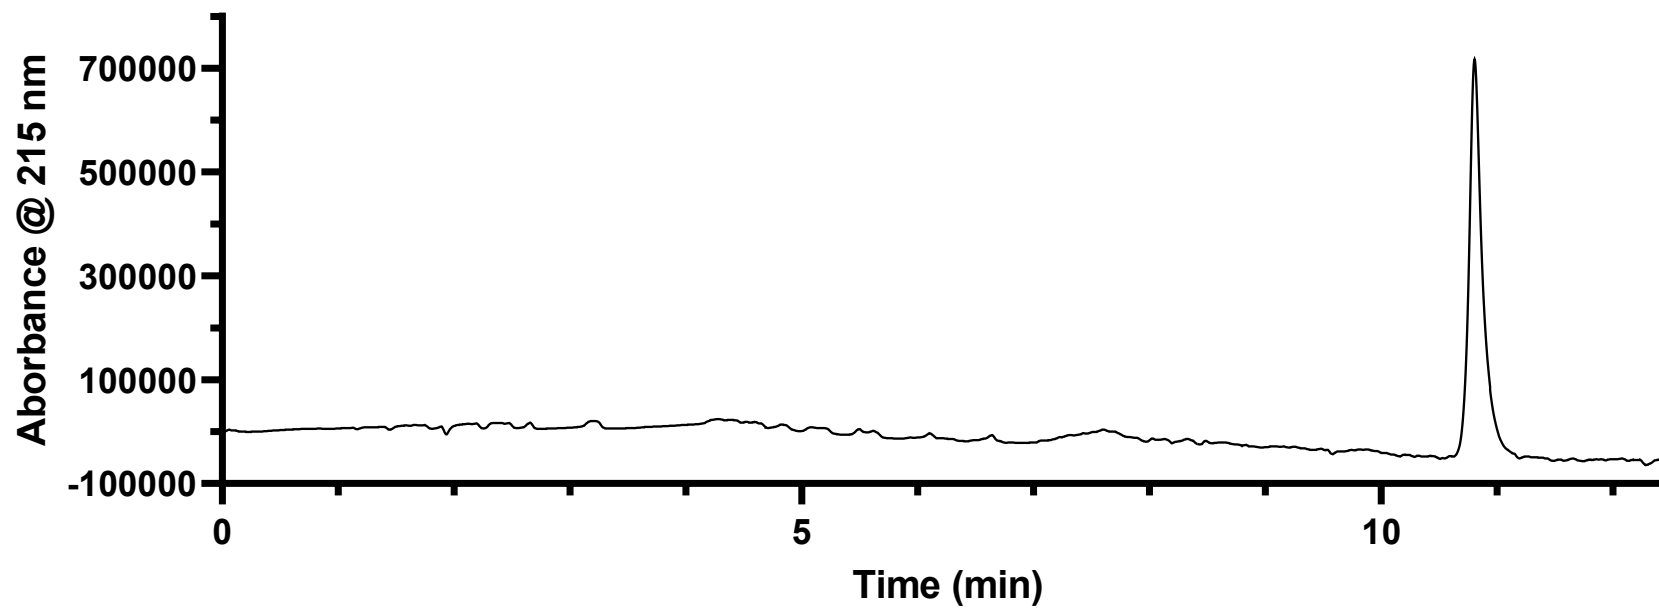

Figure S11: LC trace (215 nm detector wavelength) of **14**. The gradient was altered for this compound to ACN:H<sub>2</sub>O (0.1% formic acid) 10:90 – 80:20.

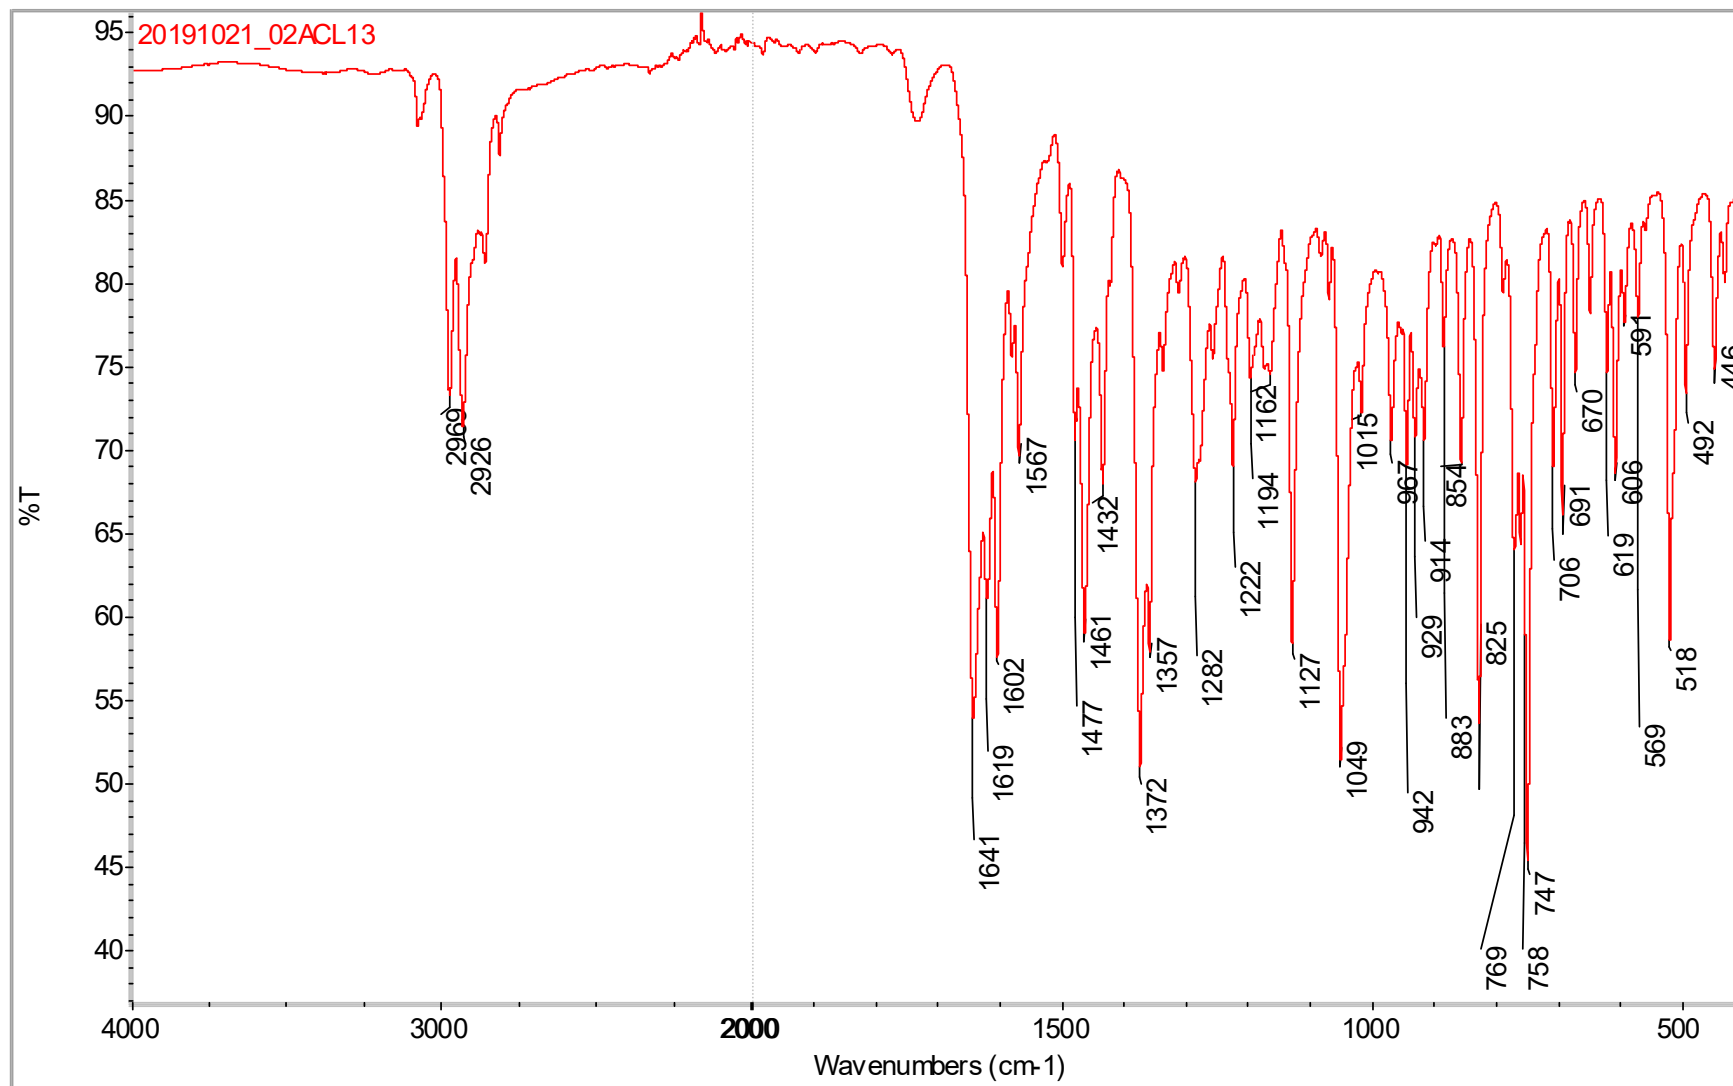

Figure S12: FT-IR spectrum of **14**

2-(2-Methoxy-1,1,3,3-tetramethylisoindolin-5-yl)-3-(2-methoxy-1,1,3,3-tetramethylisoindoline-5-carbonyl)-4H-chromen-4-one (15).

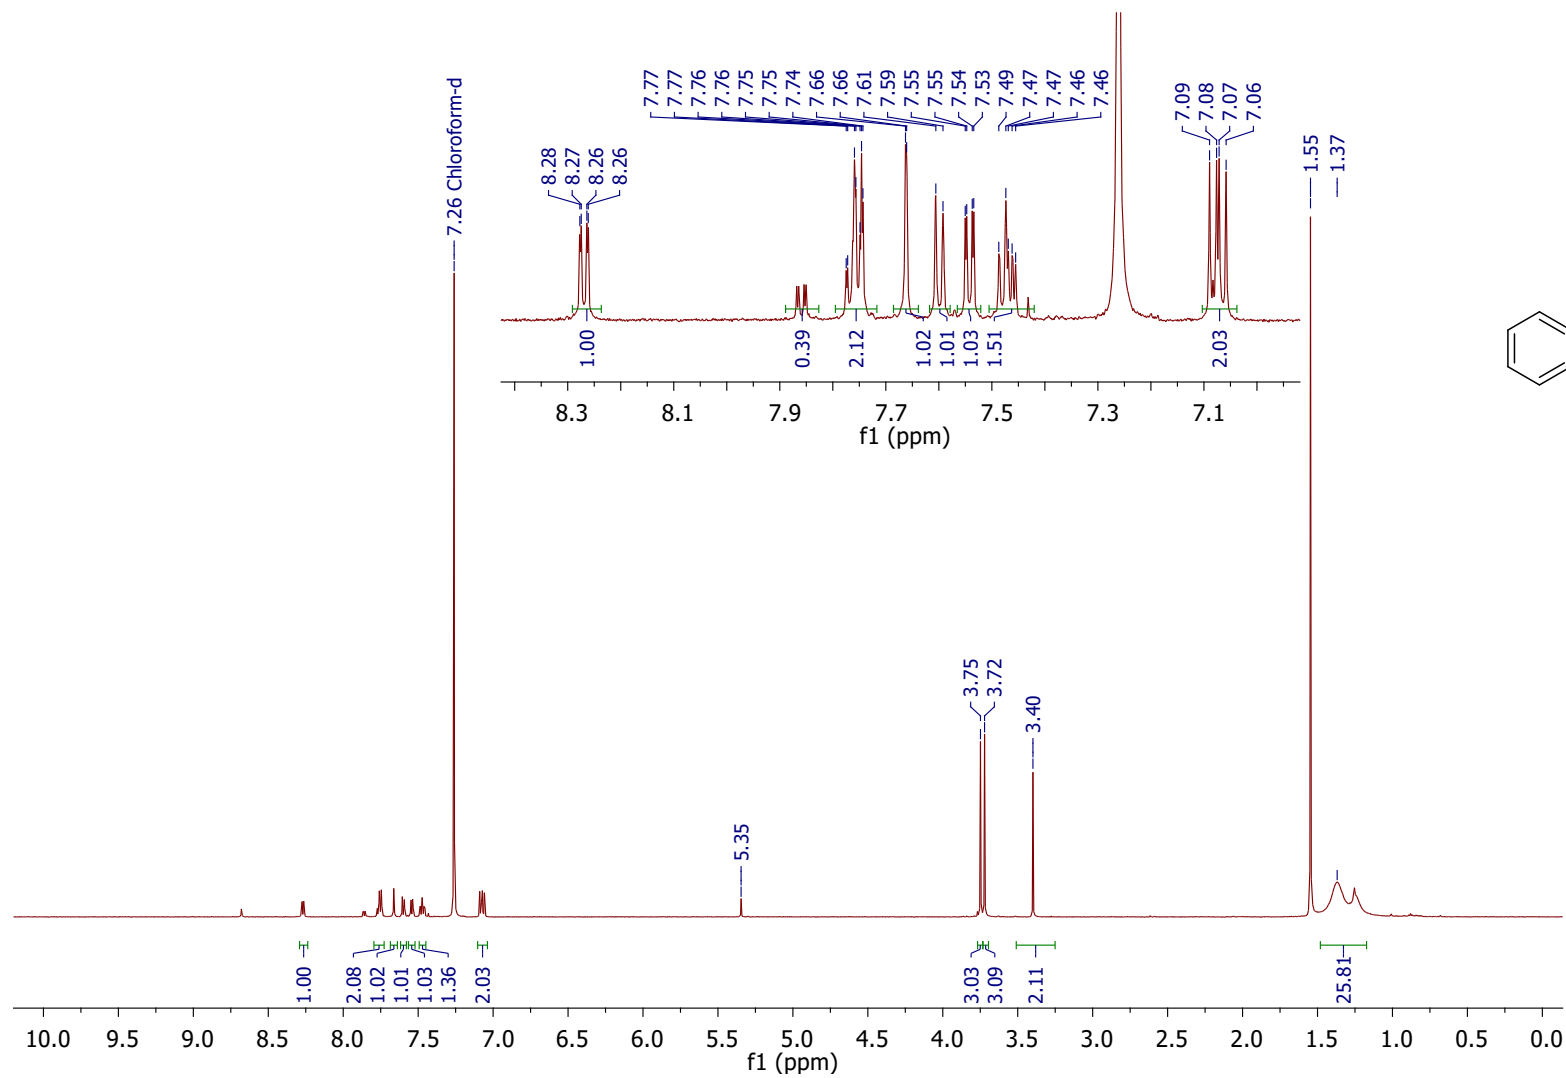

Figure S13: <sup>1</sup>H NMR spectrum of **15** (CDCl<sub>3</sub>, 600 MHz).

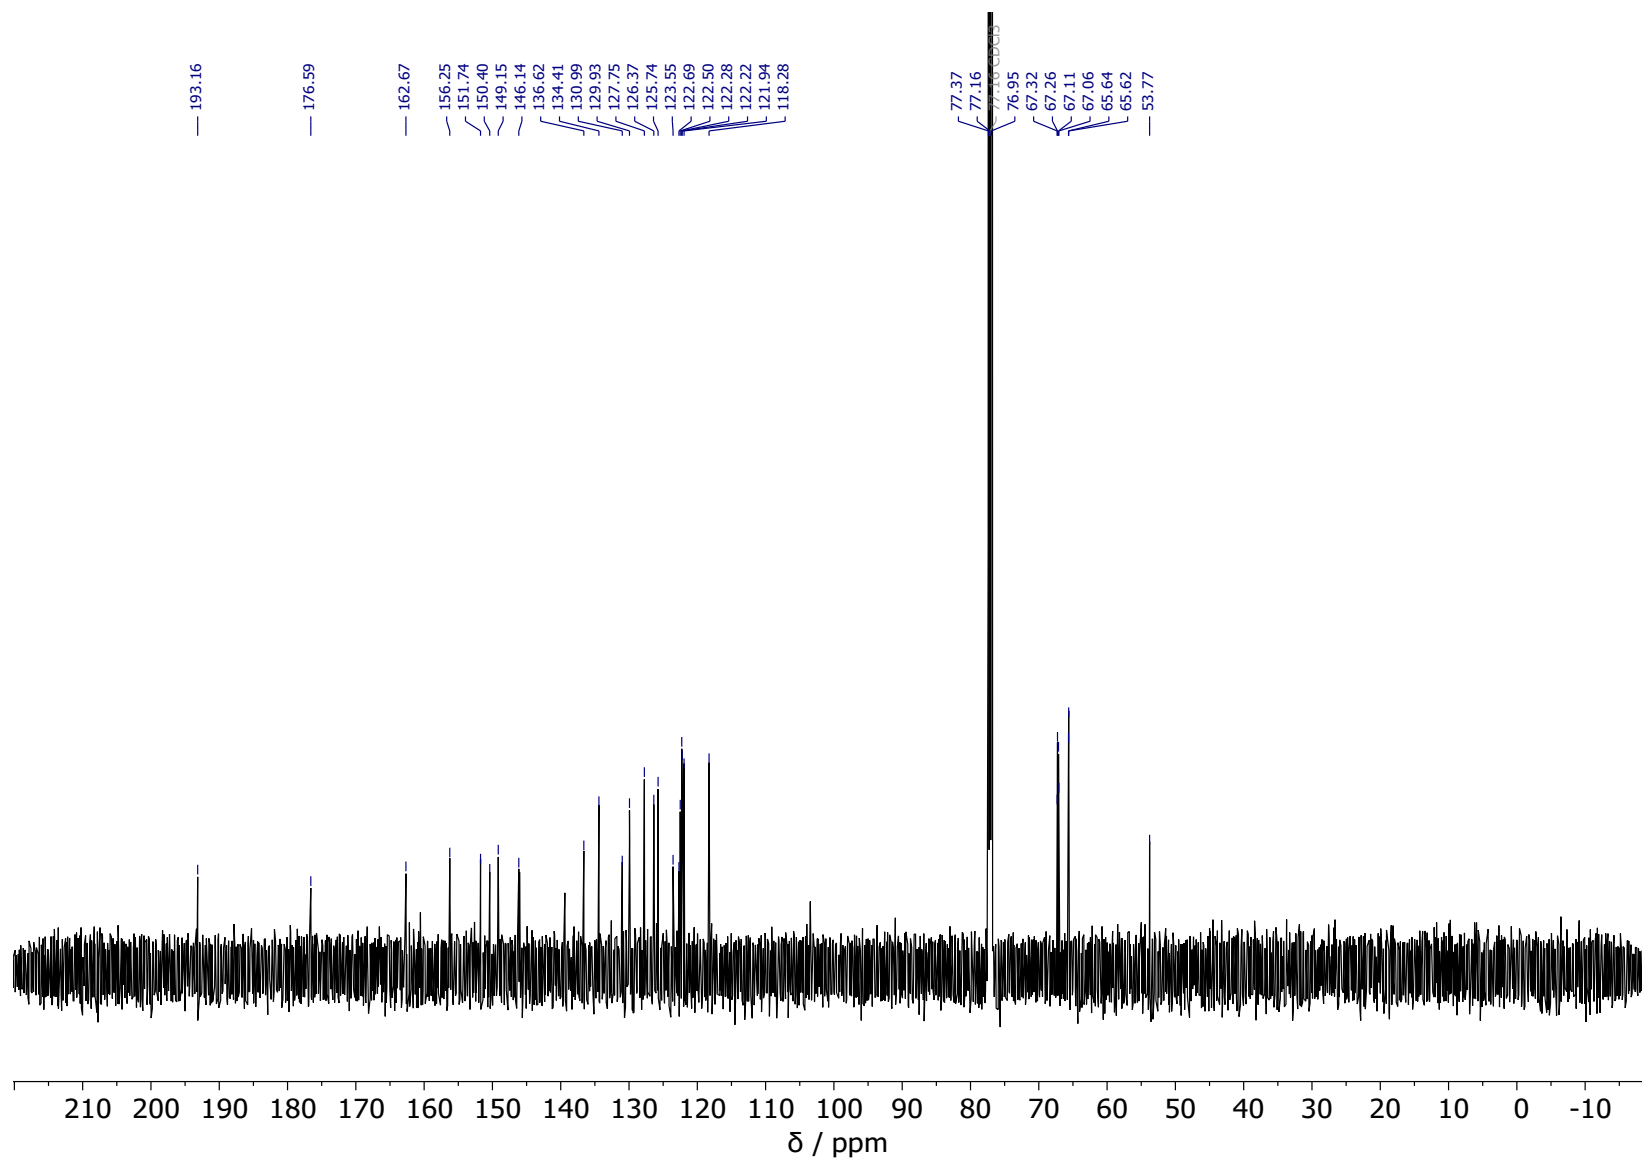

Figure S14:  $^{13}\text{C}$  NMR spectrum of **15** ( $\text{CDCl}_3$ , 151 MHz).

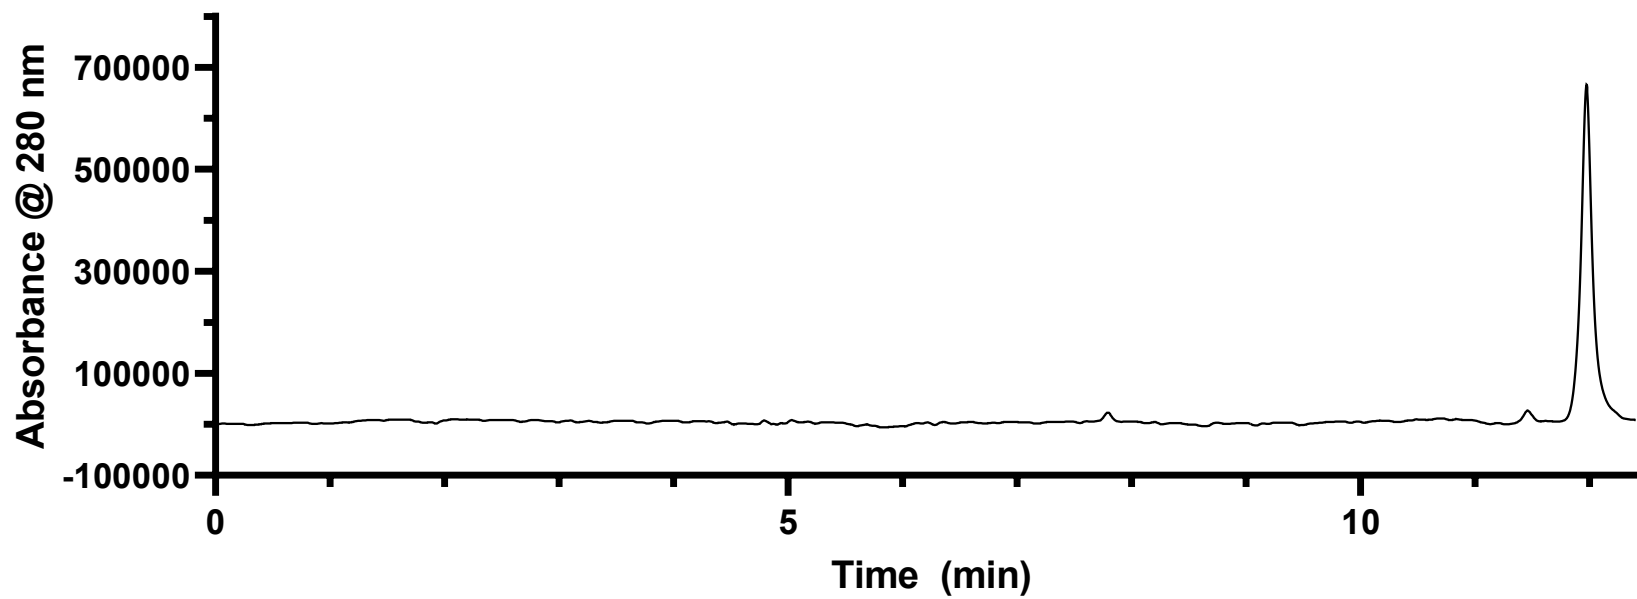

Figure S15: LC trace (280 nm detector wavelength) of **15**. The gradient was altered for this compound to ACN:H<sub>2</sub>O (0.1% formic acid) 10:90 – 80:20.



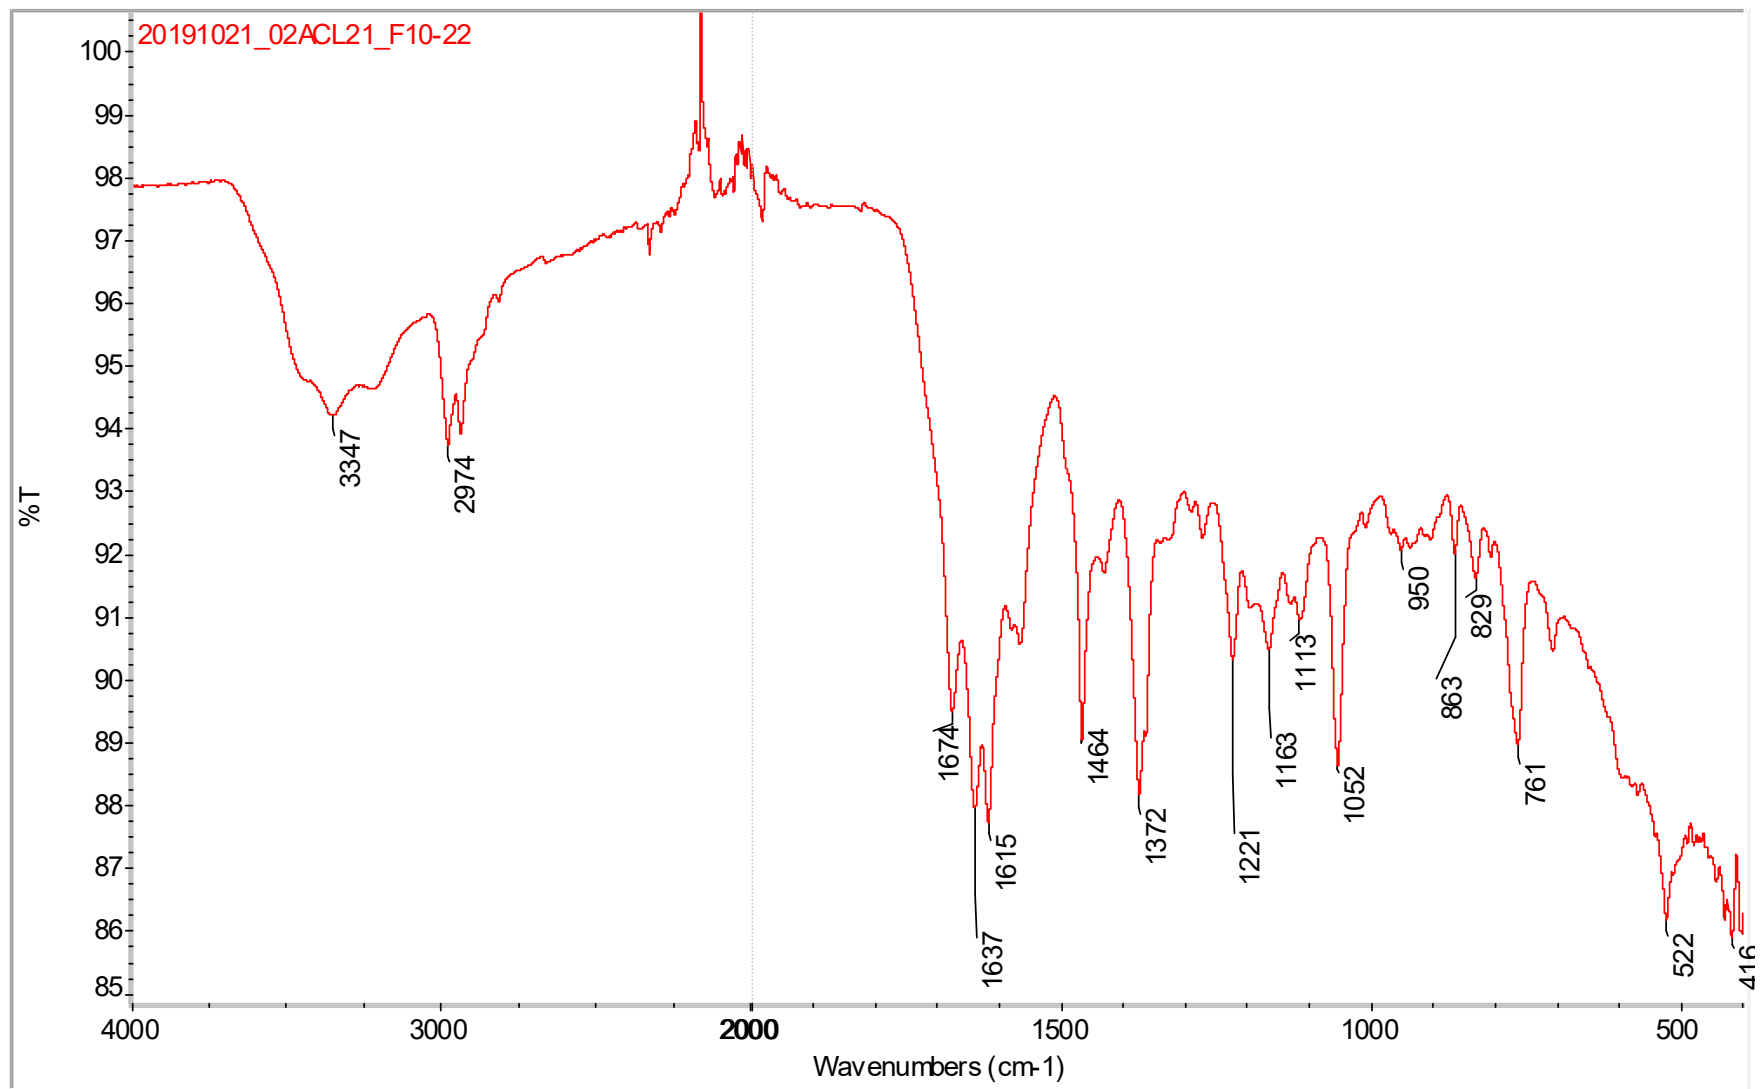

Figure S16: FT-IR spectrum of 15

2-(1,1,3,3-Tetramethylisoindolin-2-oxyl)-4H-chromen-4-one (6)

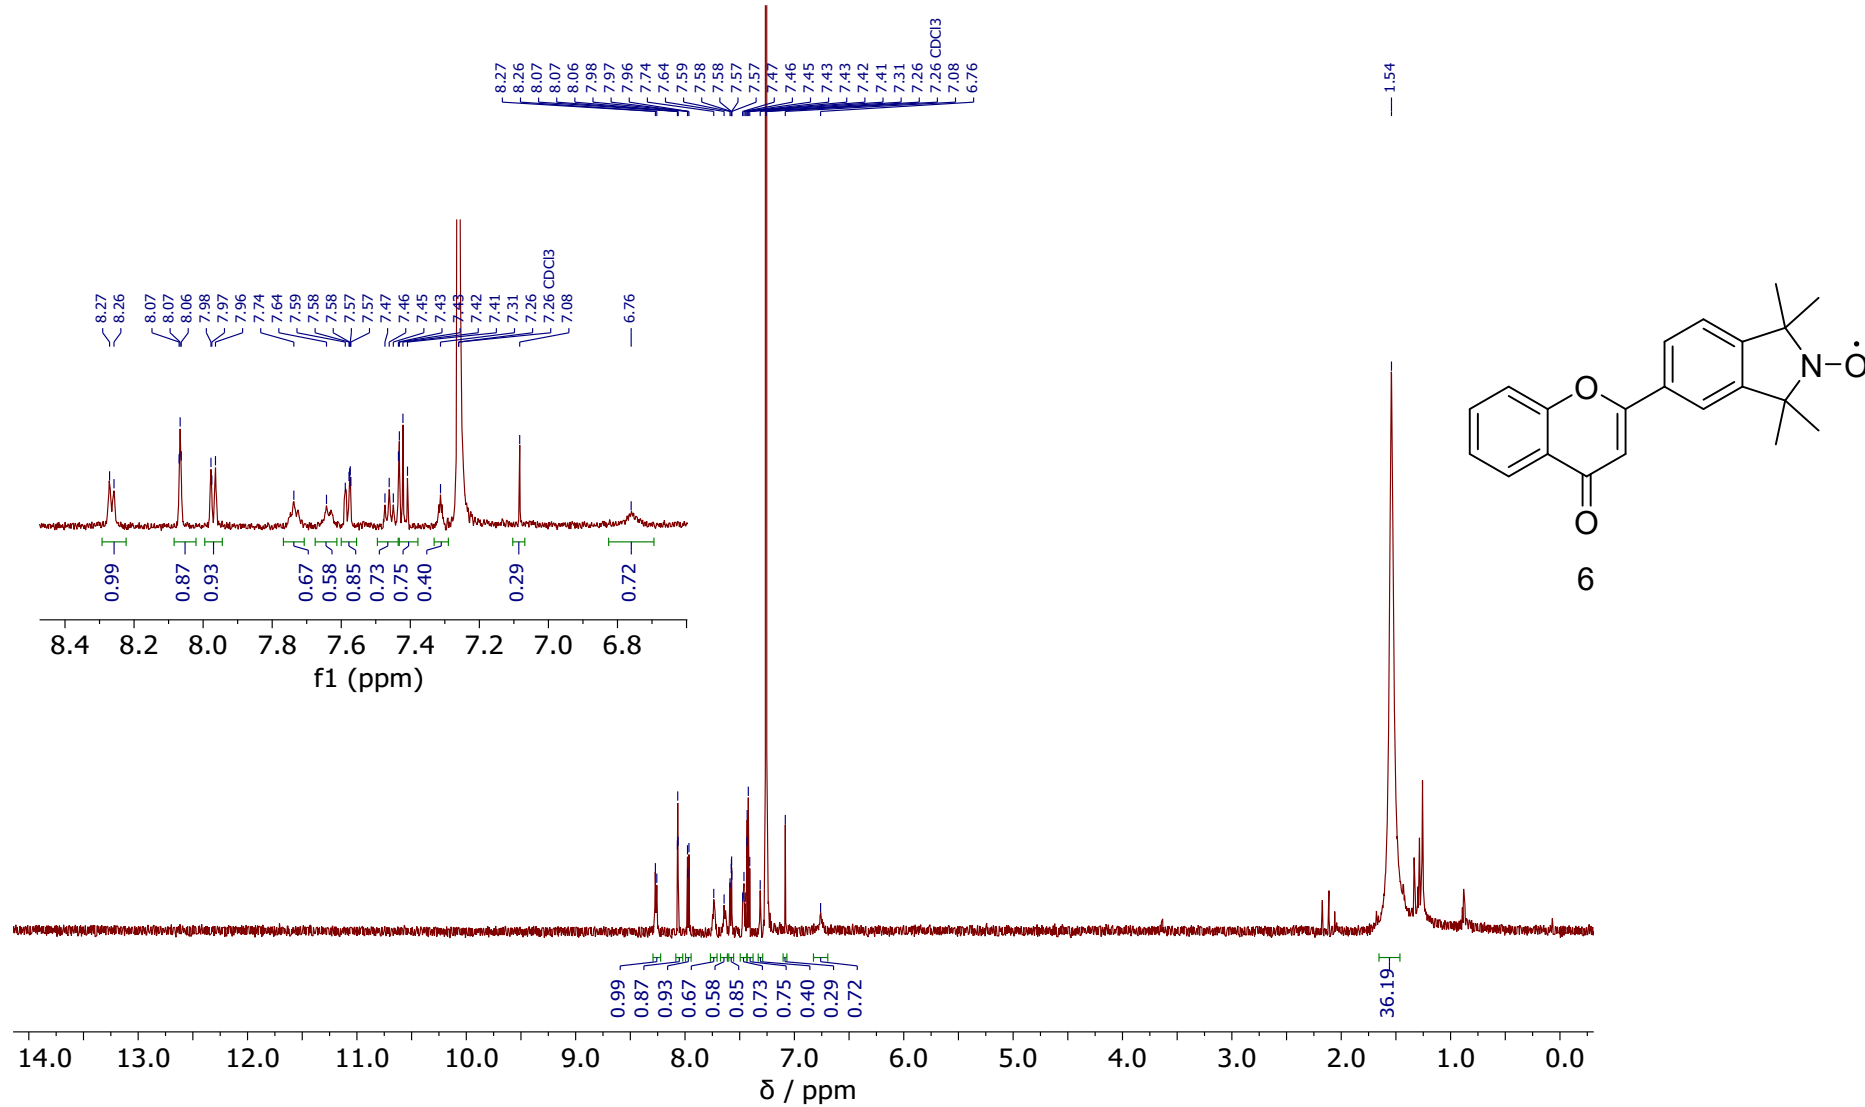

Figure S17: <sup>1</sup>H NMR spectrum of 6 (CDCl<sub>3</sub>, 600 MHz). Note: Nitroxide radicals often cause broad NMR signals, inaccurate integration, and missing integrals.

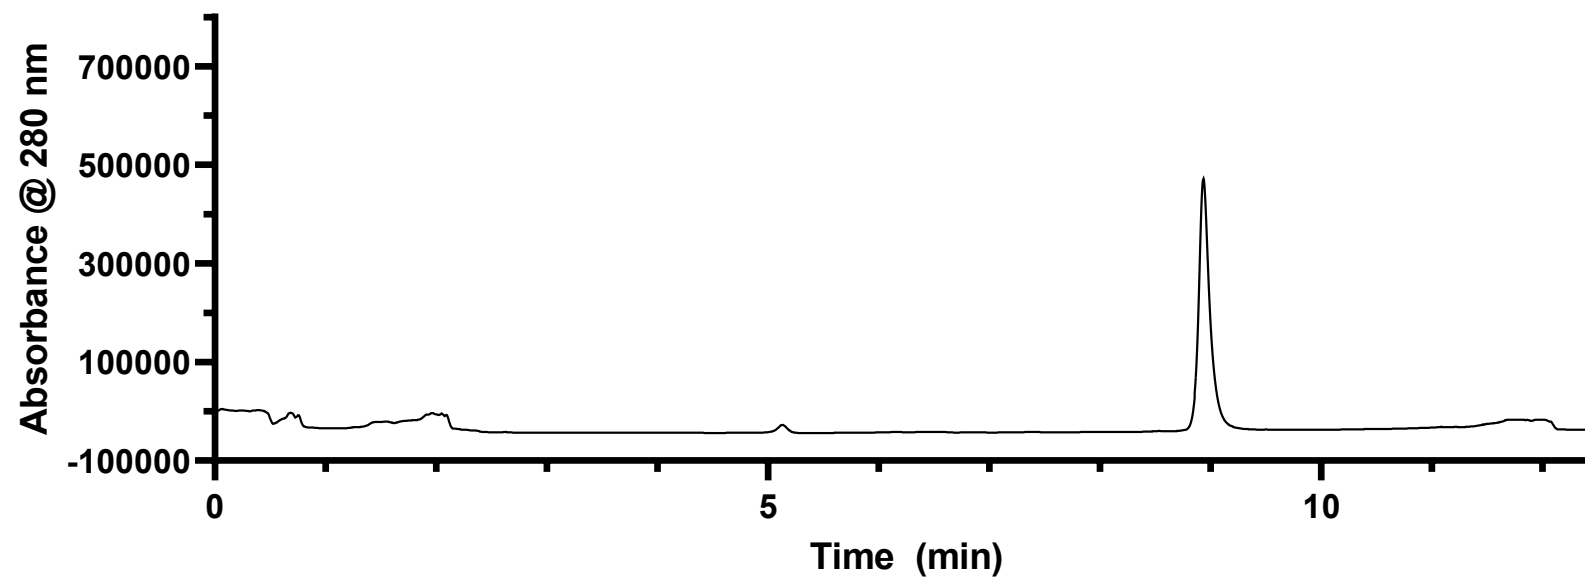

Figure S18: LC trace (280 nm detector wavelength) of **6**. The gradient was altered for this compound to ACN:H<sub>2</sub>O (0.1% formic acid) 10:90 – 80:20.

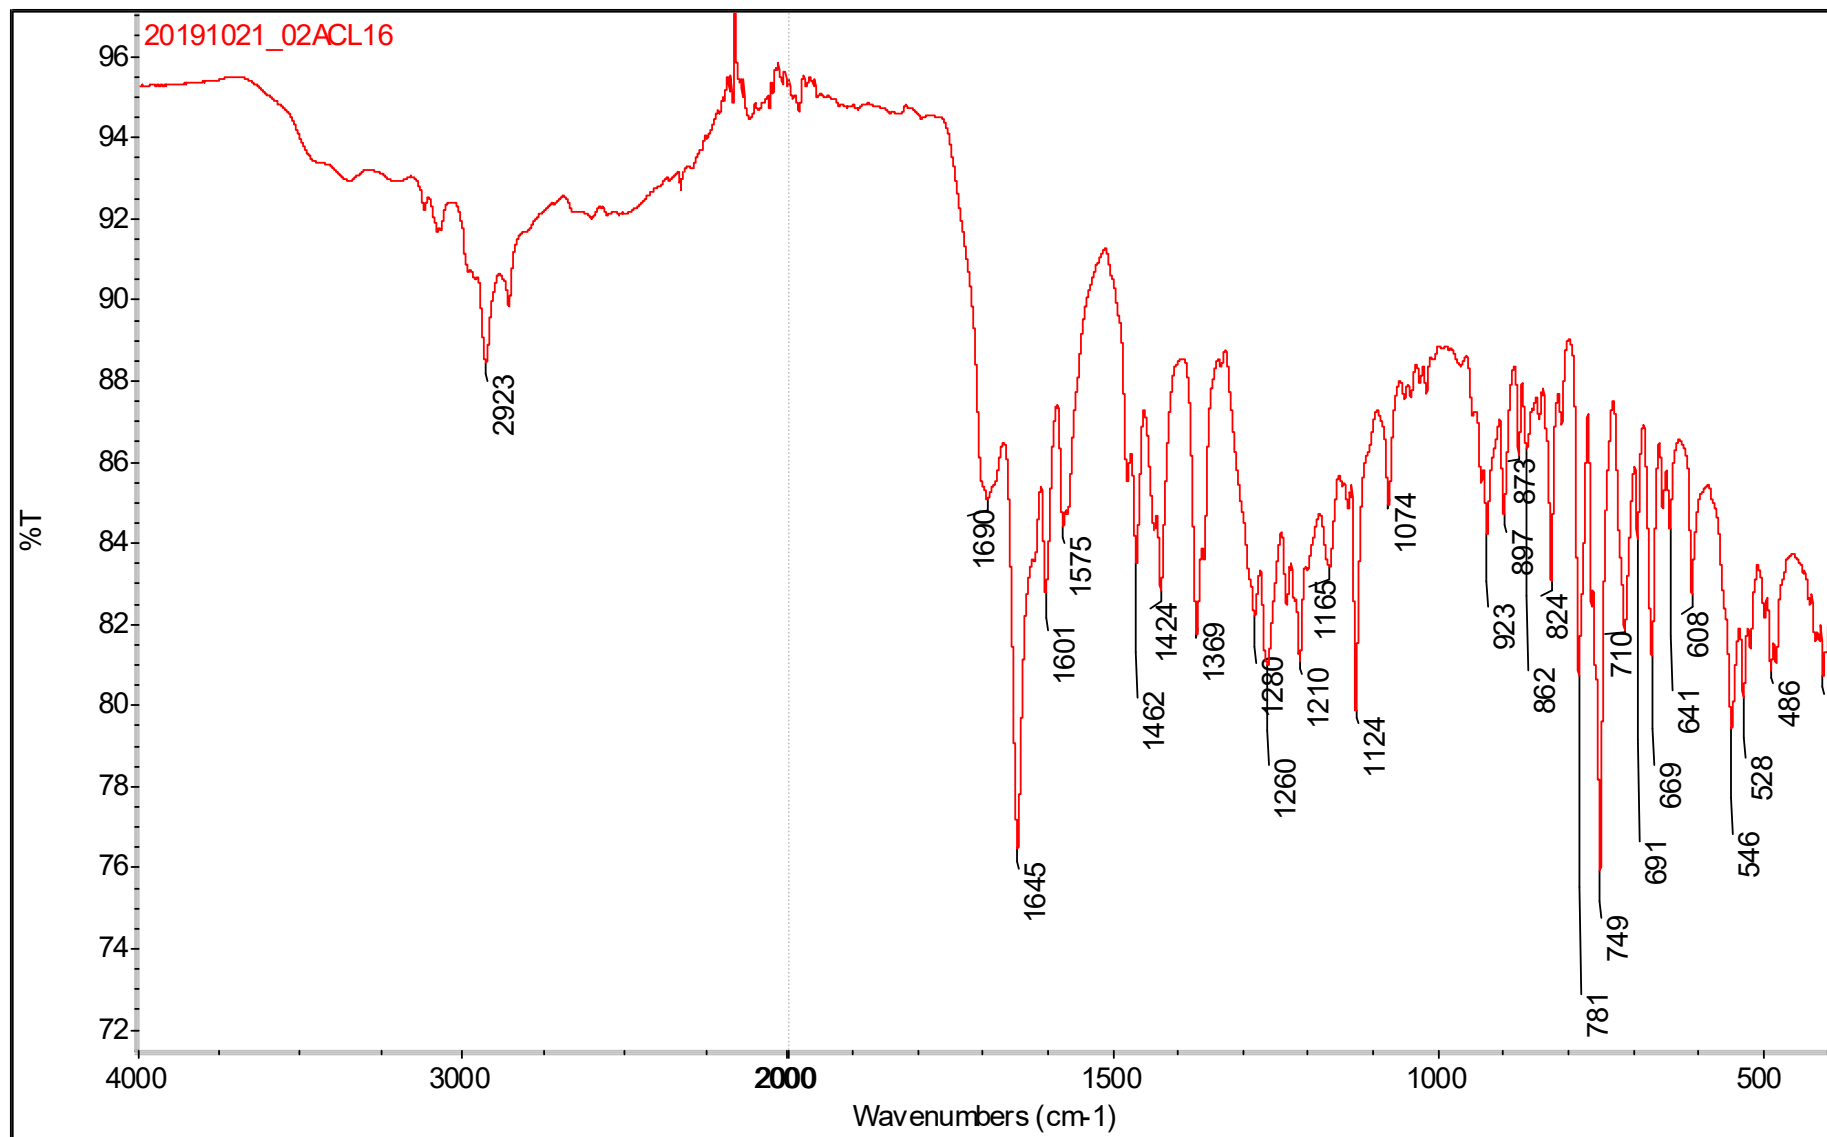

Figure S19: FT-IR spectra of 6.

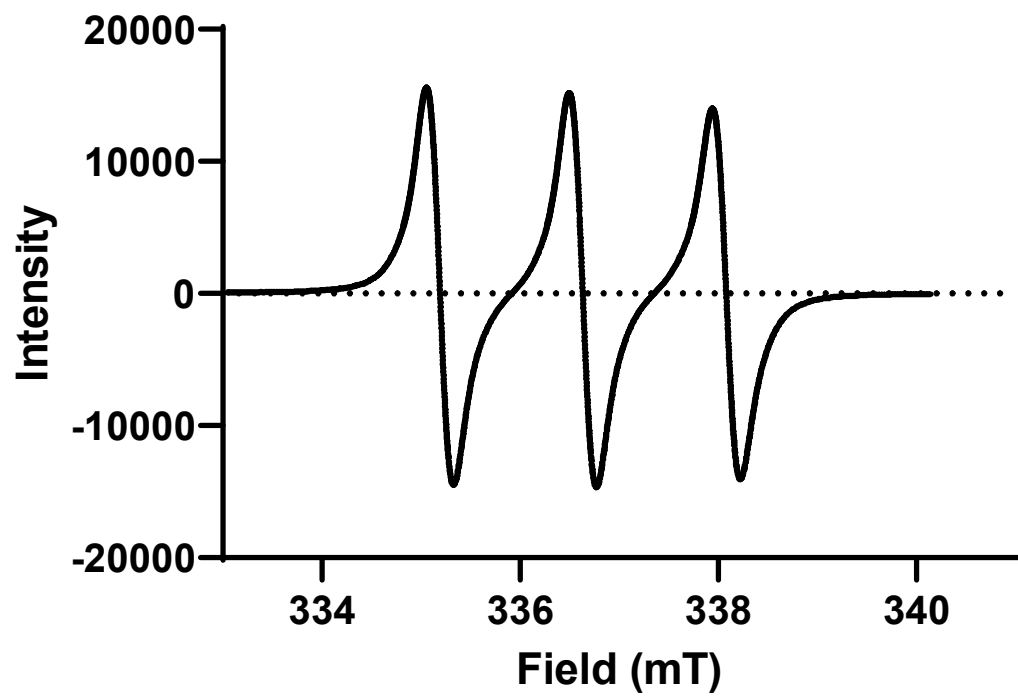

Figure S20: EPR spectrum of **6** in  $\text{CDCl}_3$  ( $a_n = 1.44$  mT,  $T = 298$  K)

2-(1,1,3,3-Tetramethylisindolin-2-oxyl)-3-(1,1,3,3-tetramethylisindolin-2-oxyl-5-carbonyl)-4H-chromen-4-one (8)

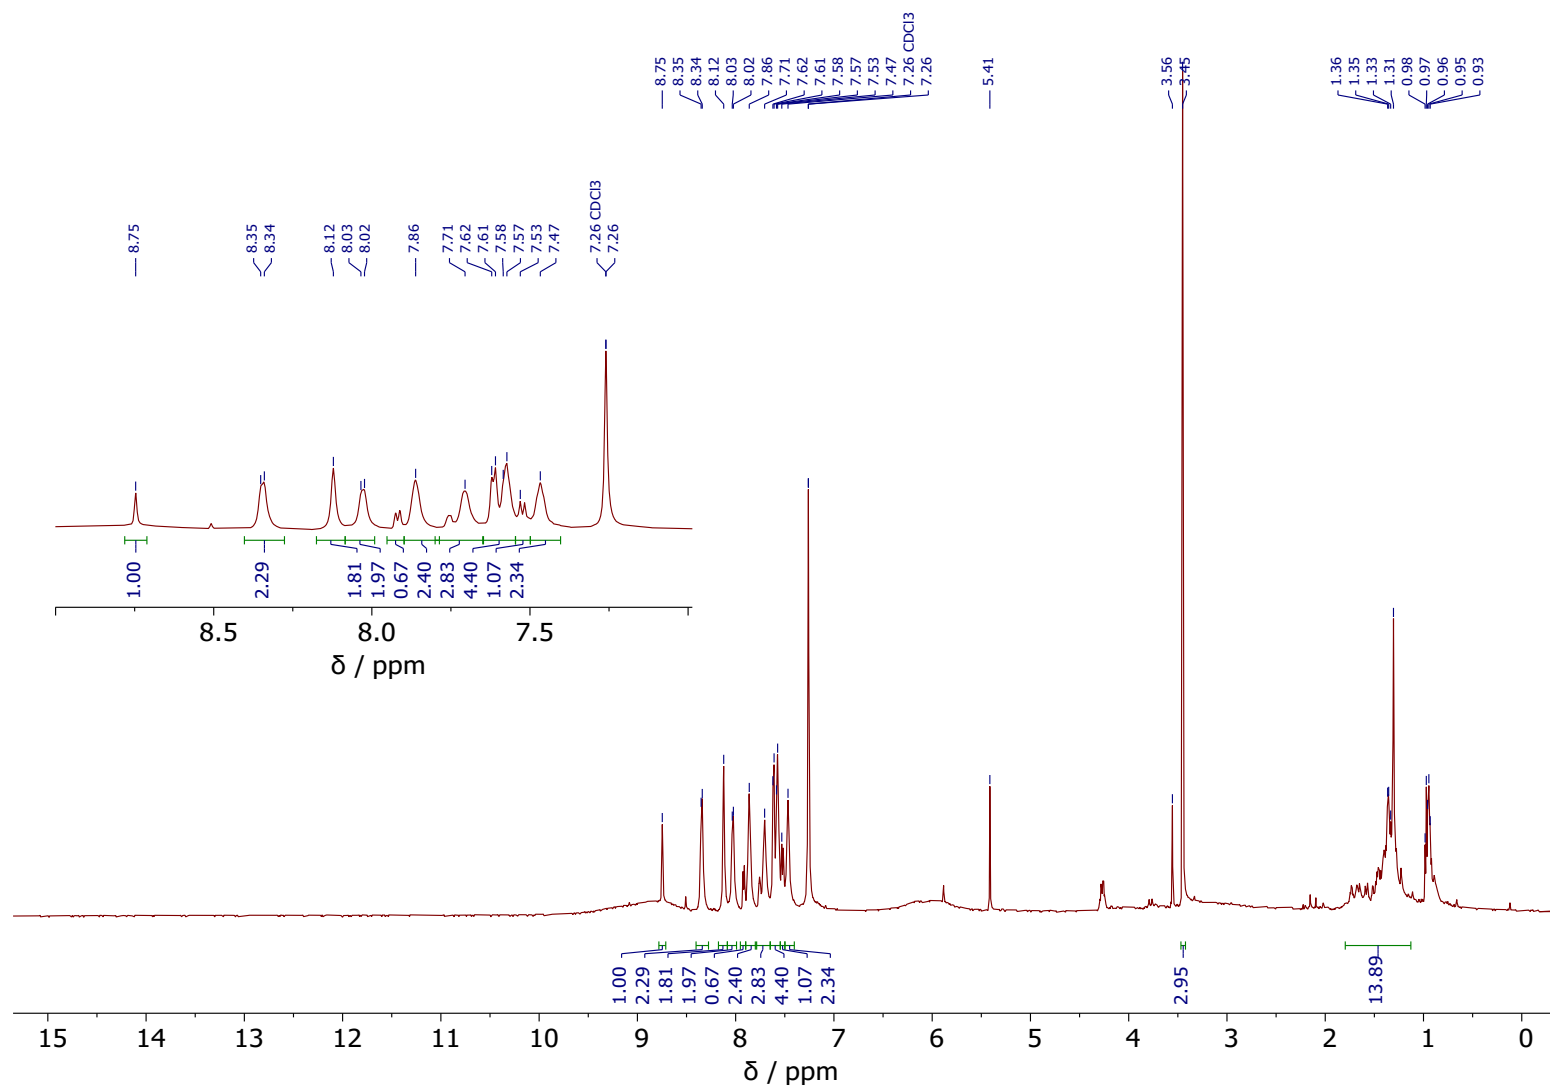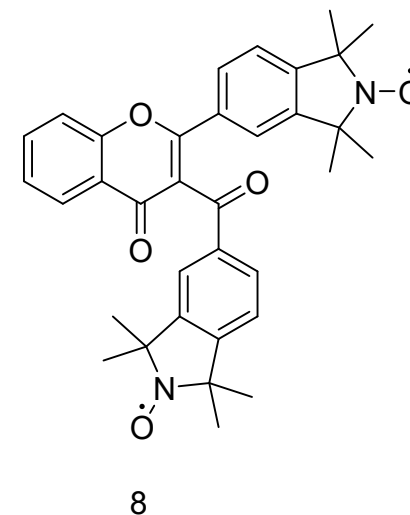

Figure S21:  $^1\text{H}$  NMR Spectrum of **8** ( $\text{CDCl}_3$ , 600 MHz). *Note:* Nitroxide radicals often cause broad NMR signals, inaccurate integration, and missing integrals.

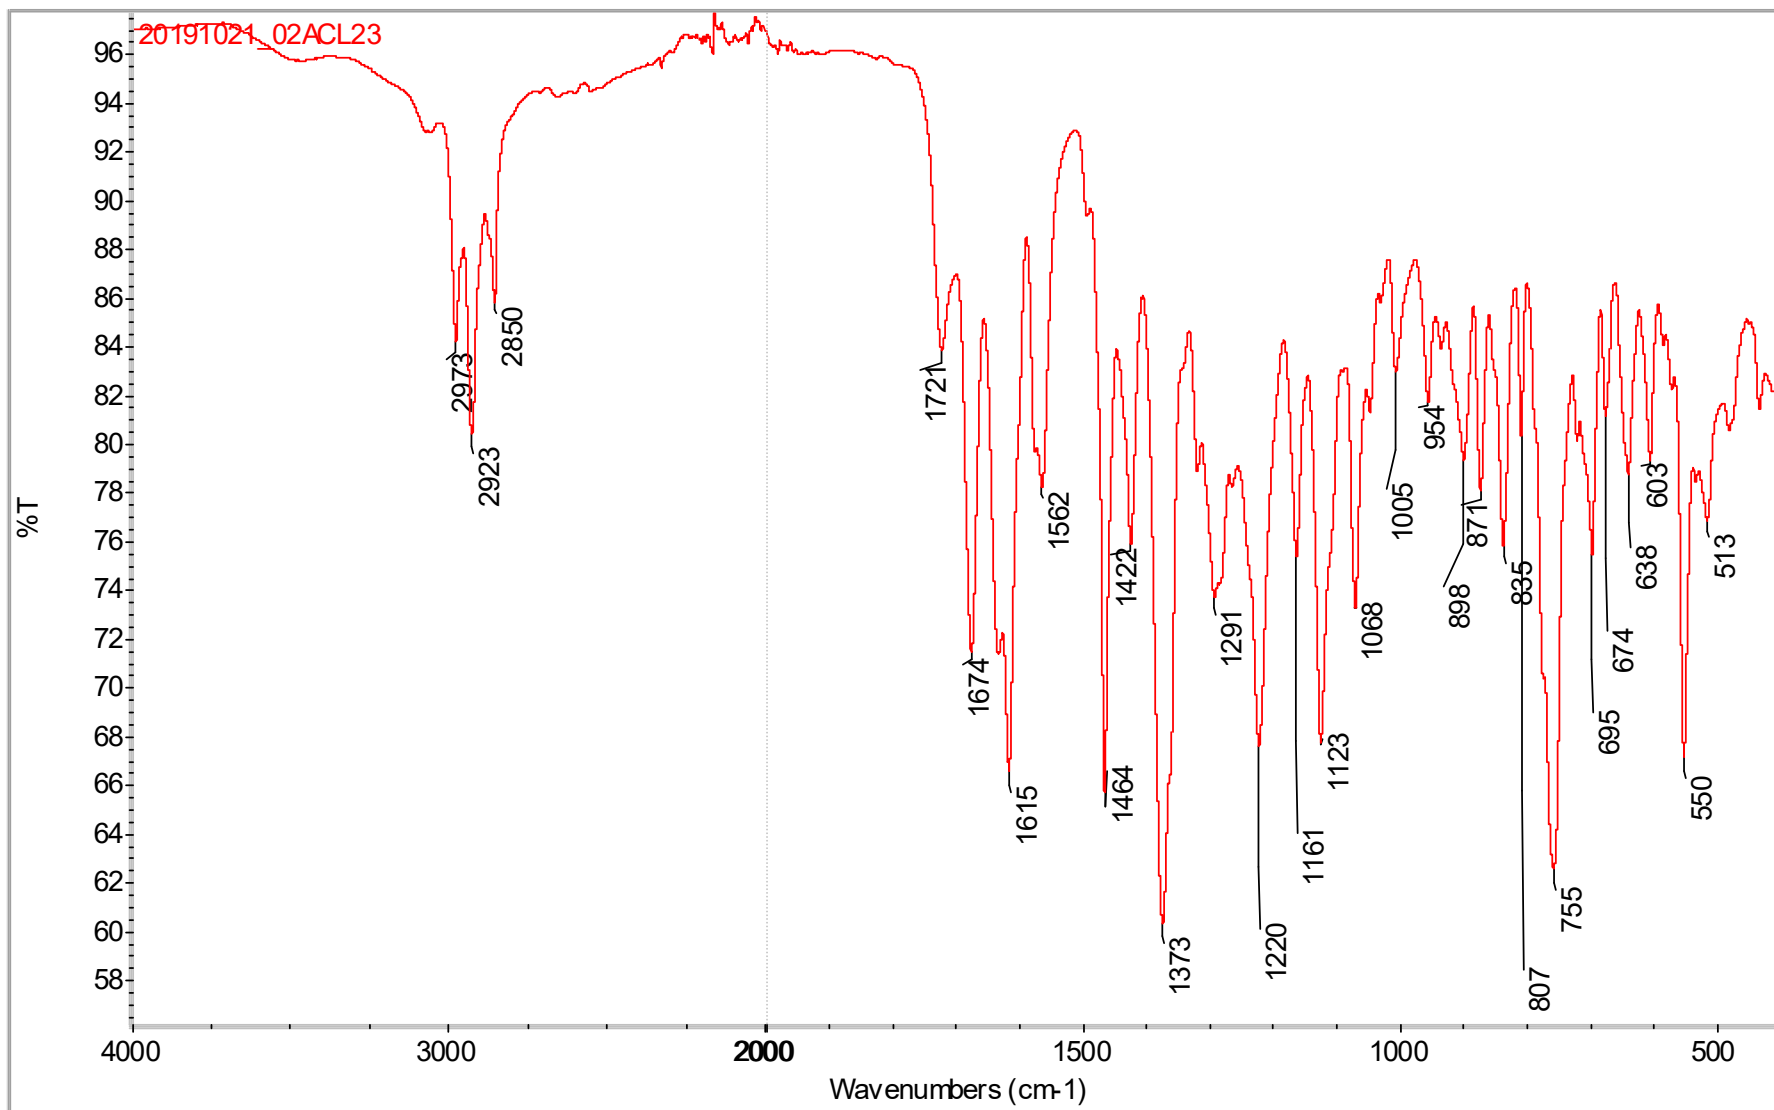

Figure S22: FT-IR spectrum of **8**.

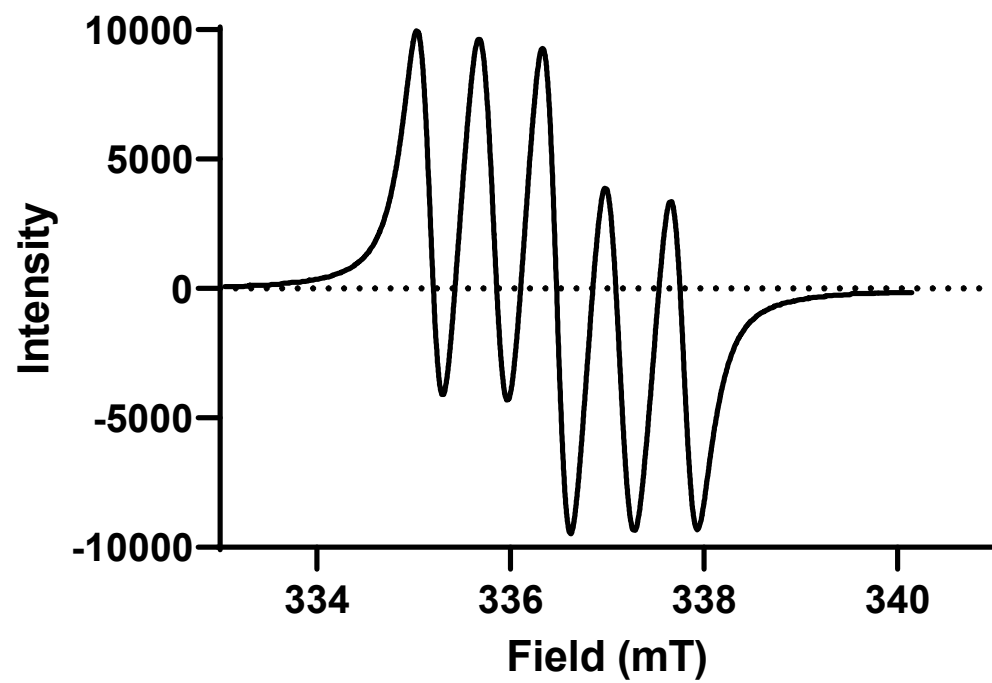

Figure S23: EPR Spectrum of **8** in CDCl<sub>3</sub> ( $a_N = 1.294$  mT,  $T = 298$  K).



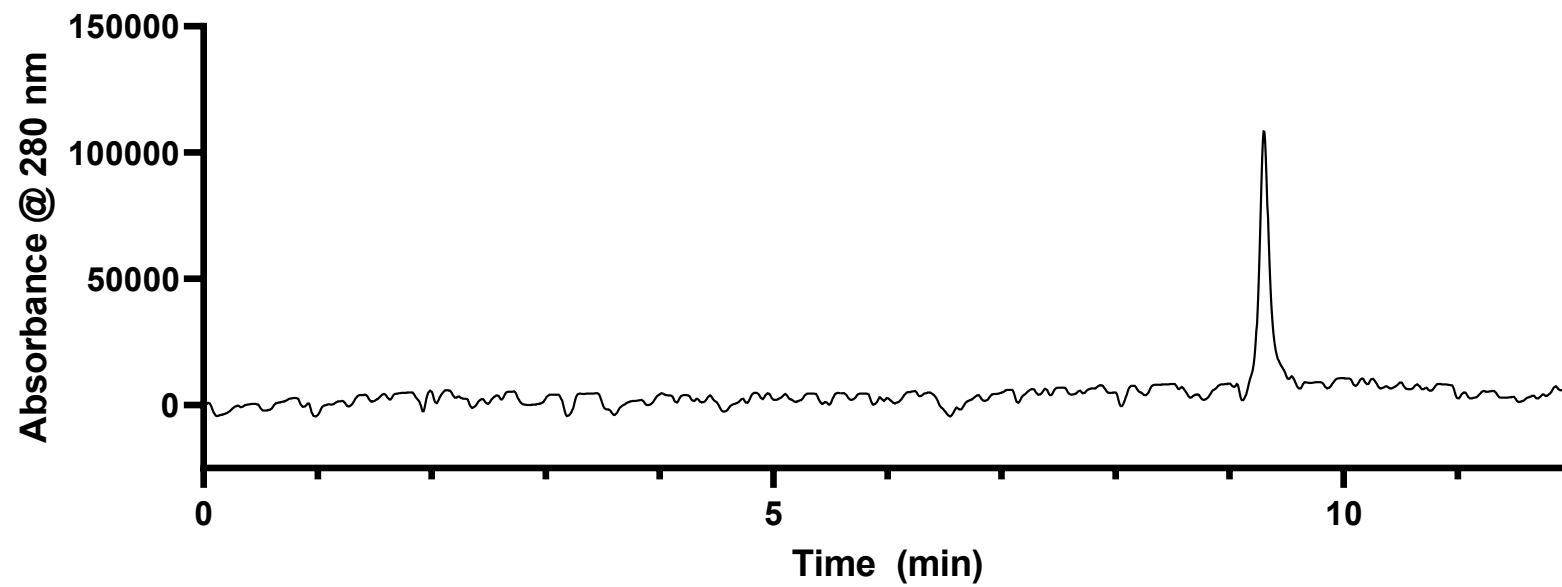

Figure S24: LC trace (280 nm detector wavelength) of **8**. The gradient was altered for this compound to ACN:H<sub>2</sub>O (0.1% formic acid) 10:90 – 80:20.

2-Acetyl-3-hydroxyphenyl 2-methoxy-1,1,3,3-tetramethylisoindoline-5-carboxylate (17)

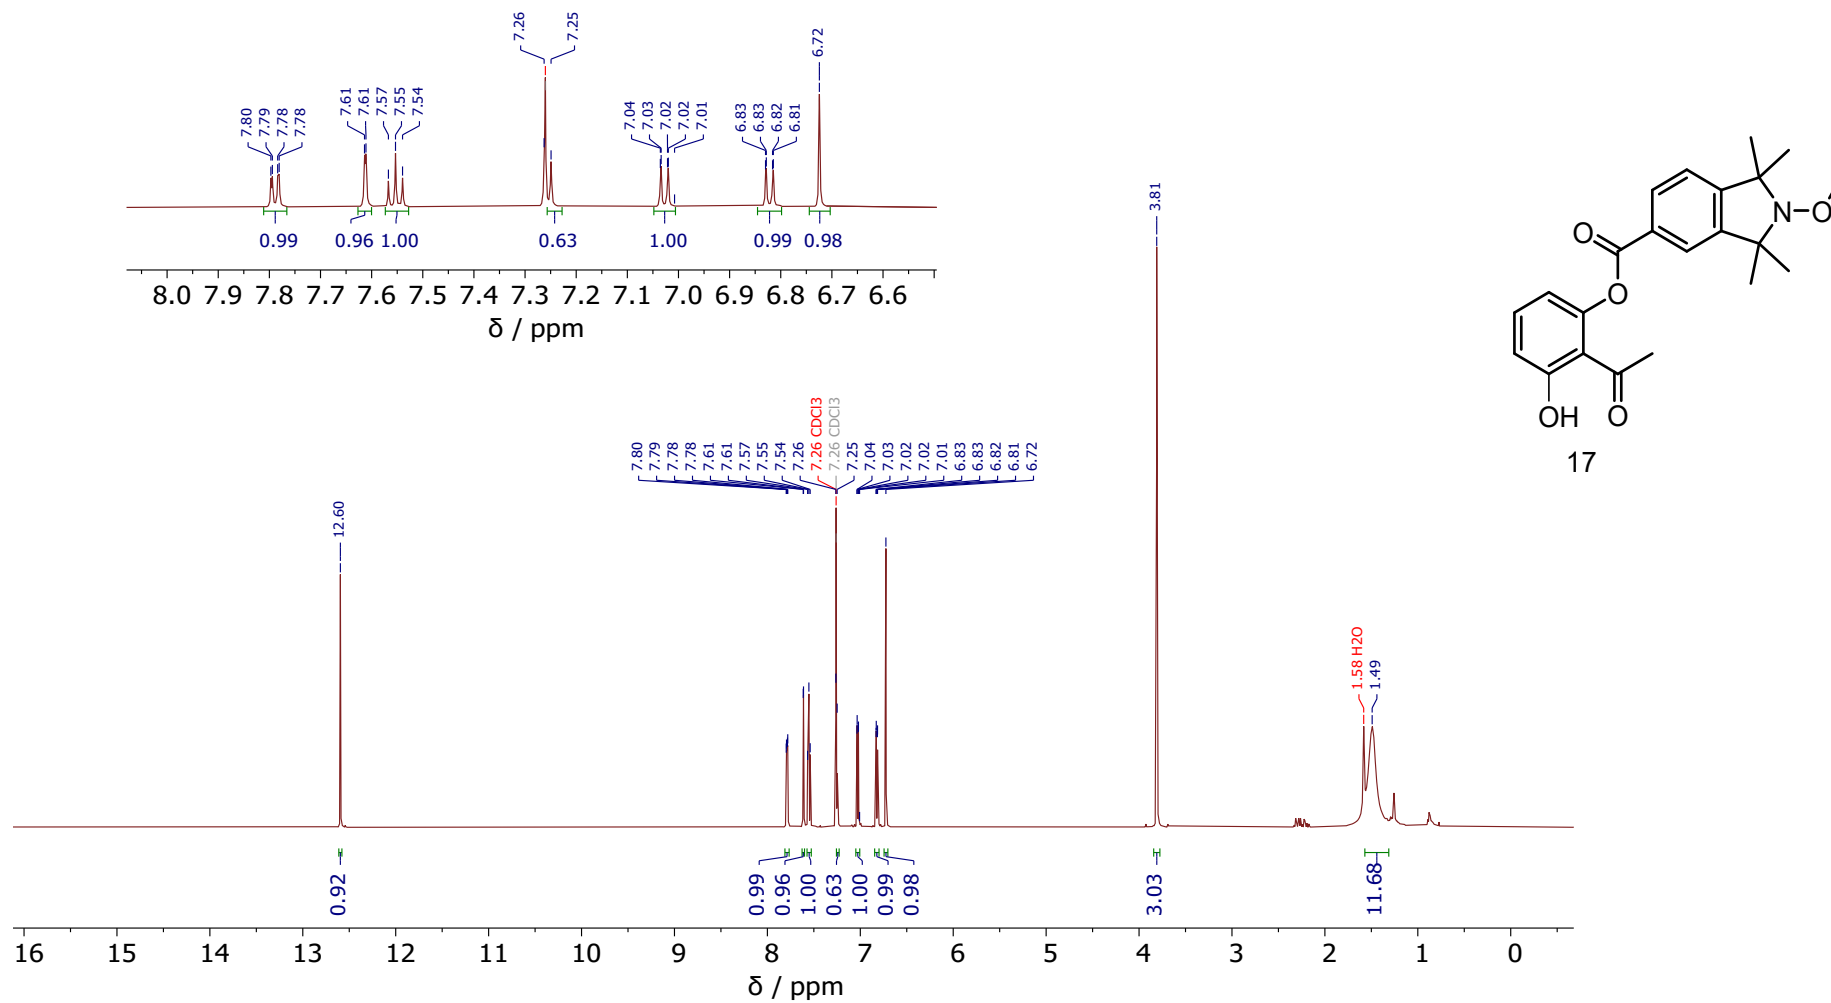

Figure S25: <sup>1</sup>H NMR spectrum of 17 (CDCl<sub>3</sub>, 600 MHz).

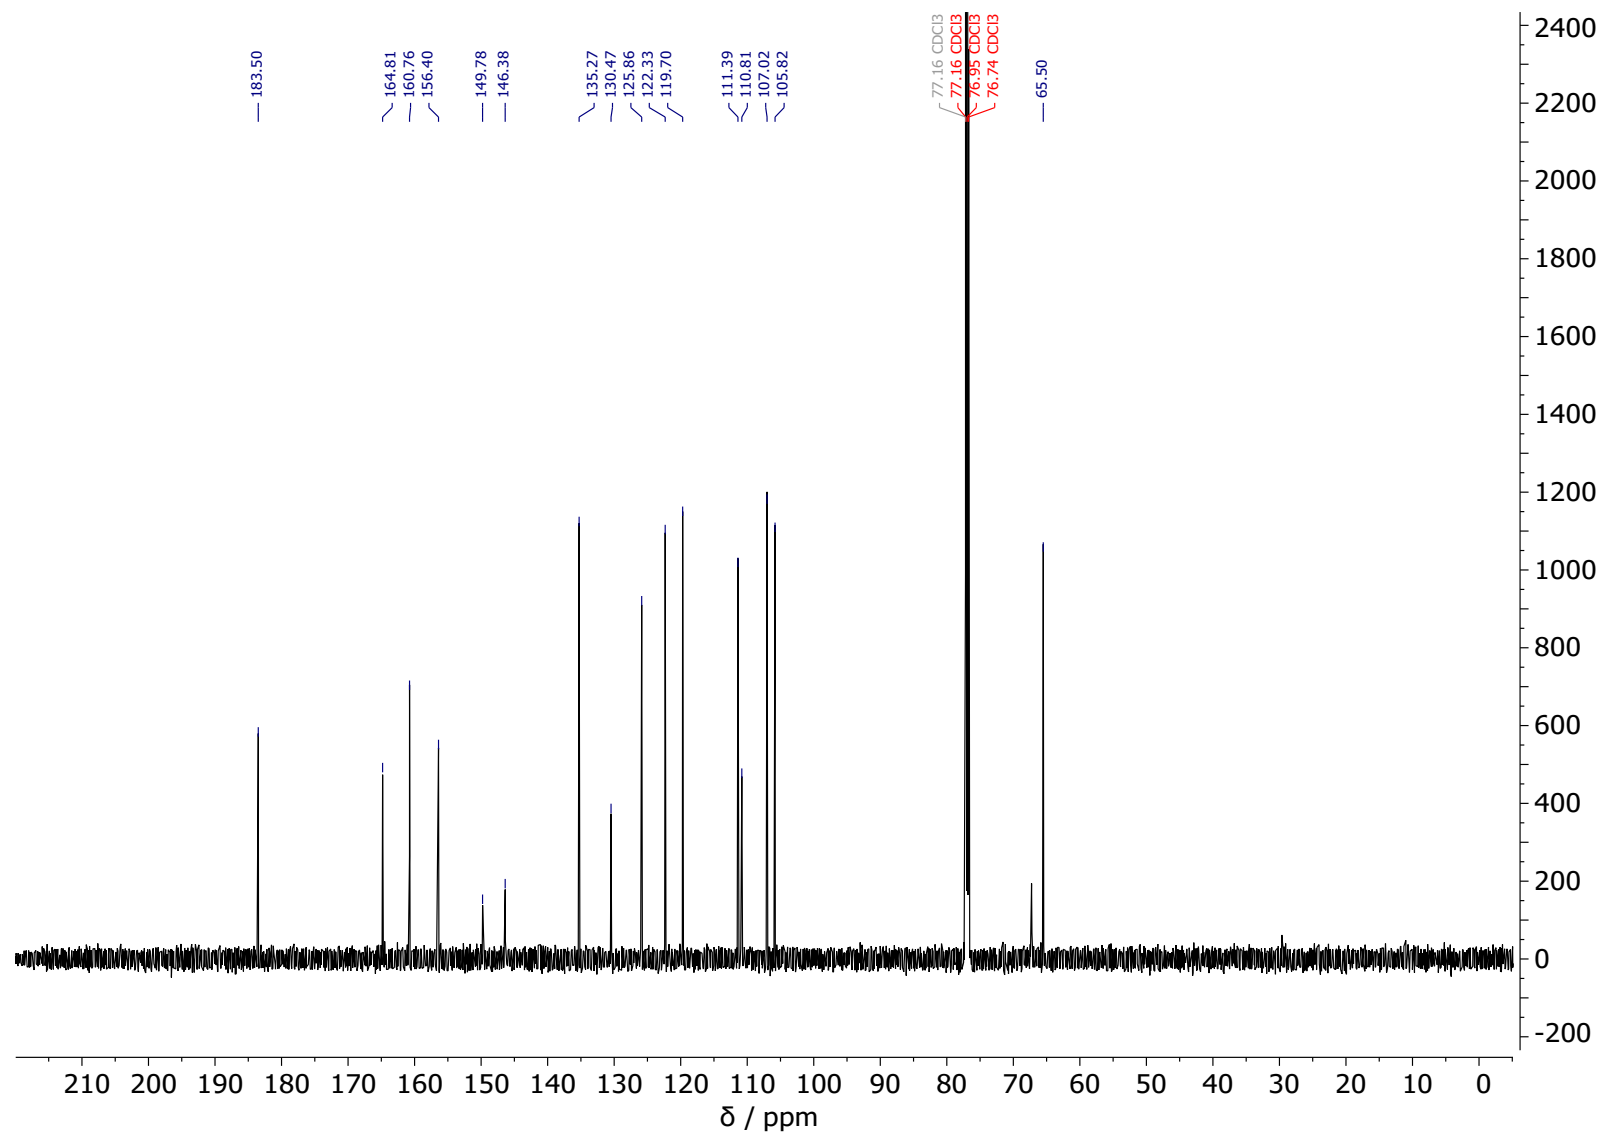

Figure S26:  $^{13}\text{C}$  NMR spectrum of **17** ( $\text{CDCl}_3$ , 151 MHz).

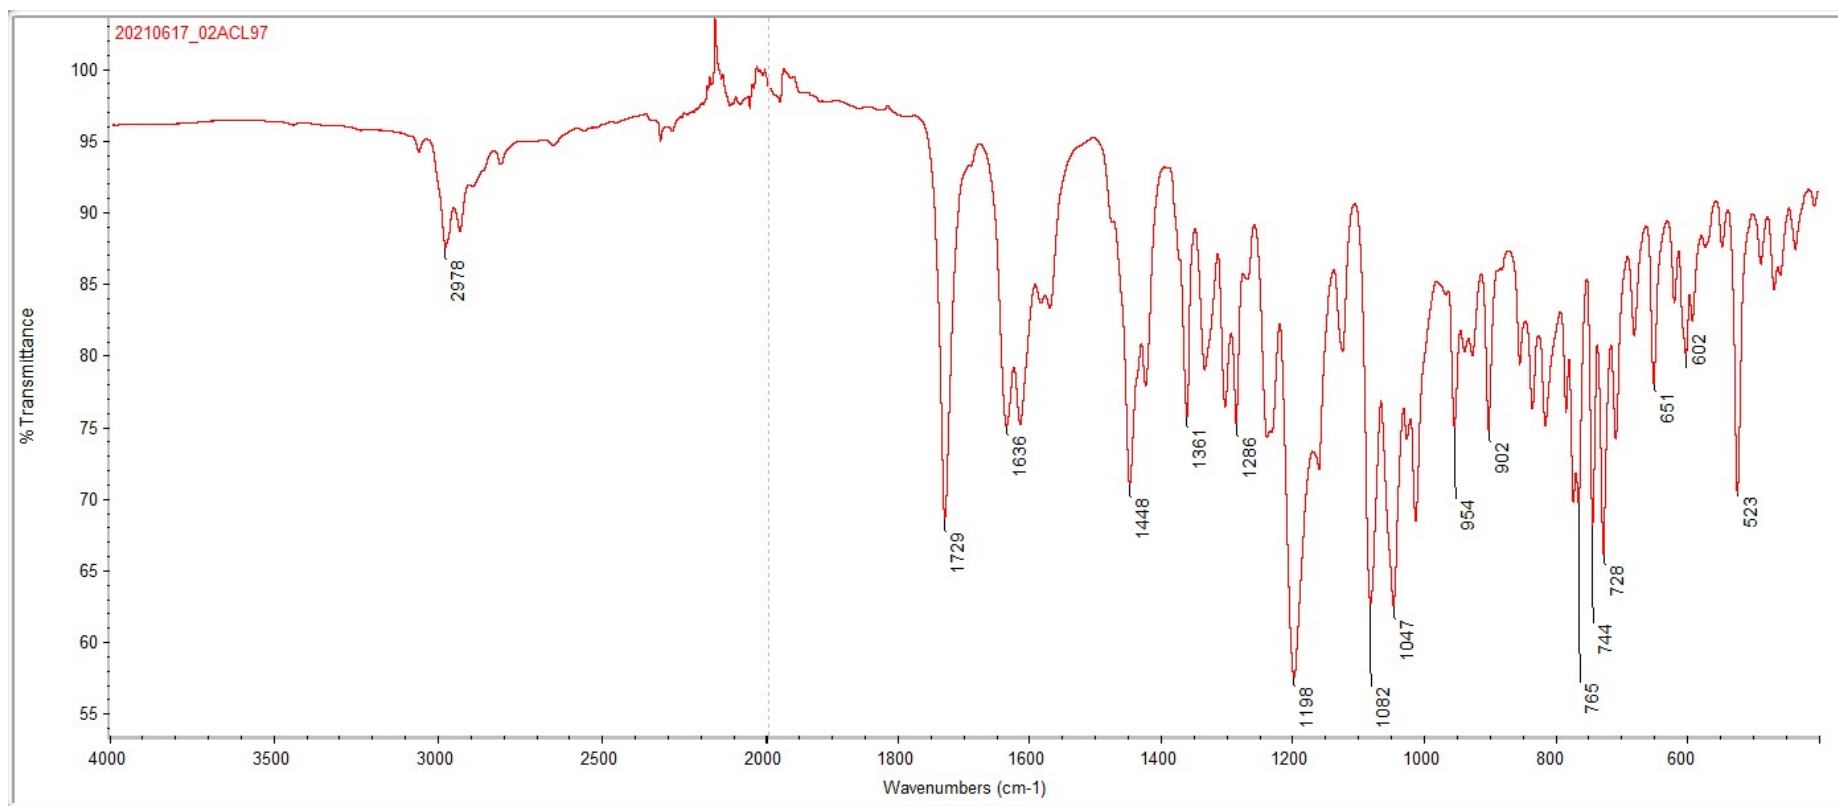

Figure S27: FT-IR spectrum of **17**

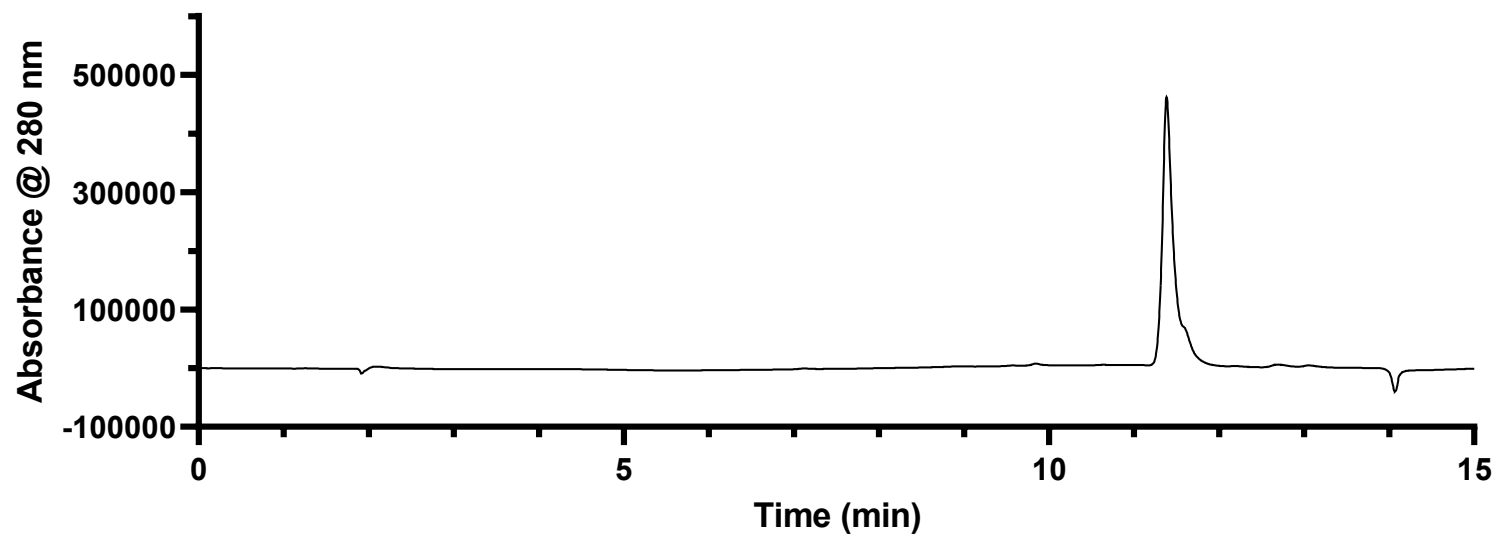

Figure S28: LC trace (280 nm detector wavelength) of **17**. The gradient was altered for this compound to ACN:H<sub>2</sub>O (0.1% formic acid) 10:90 – 80:20.

5-Hydroxy-2-(2-methoxy-1,1,3,3-tetramethylisoindolin-5-yl)-4H-chromen-4-one (18)

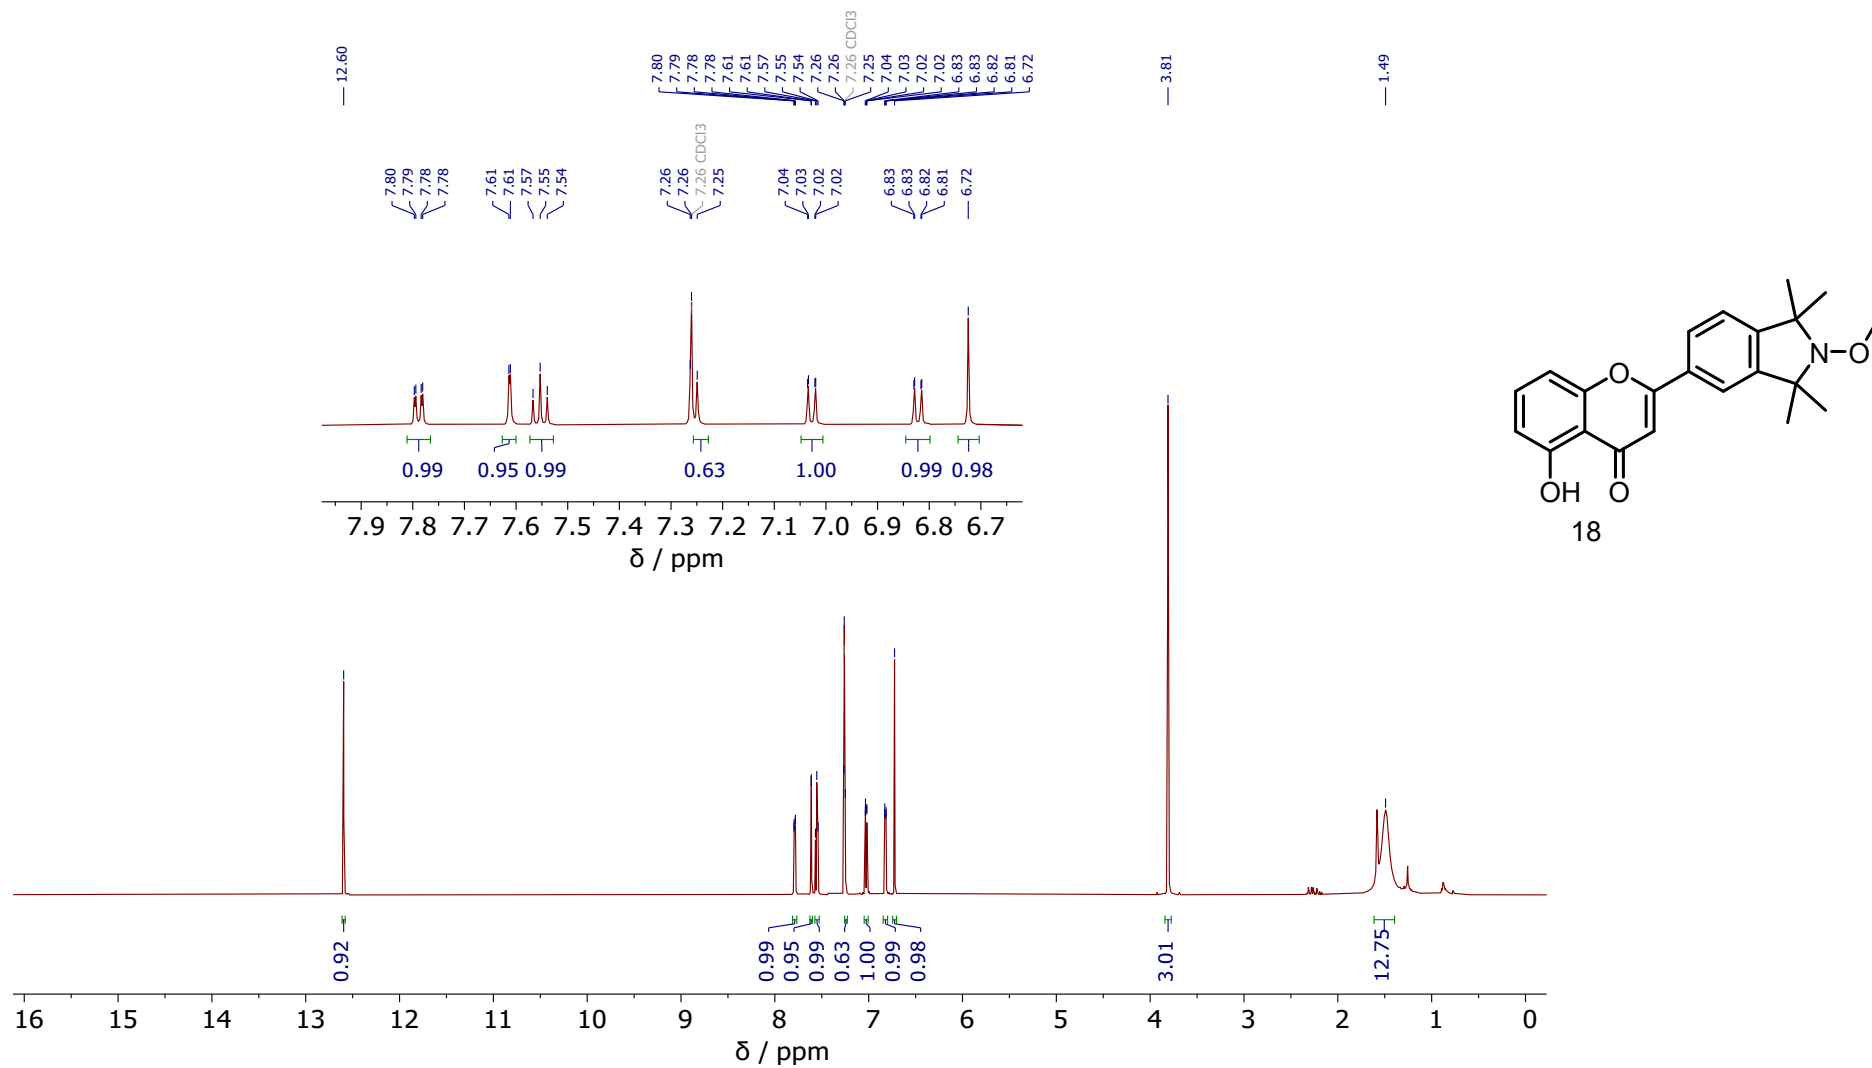

Figure S33:  $^1\text{H}$  NMR spectrum of **18** ( $\text{CDCl}_3$ , 600 MHz).

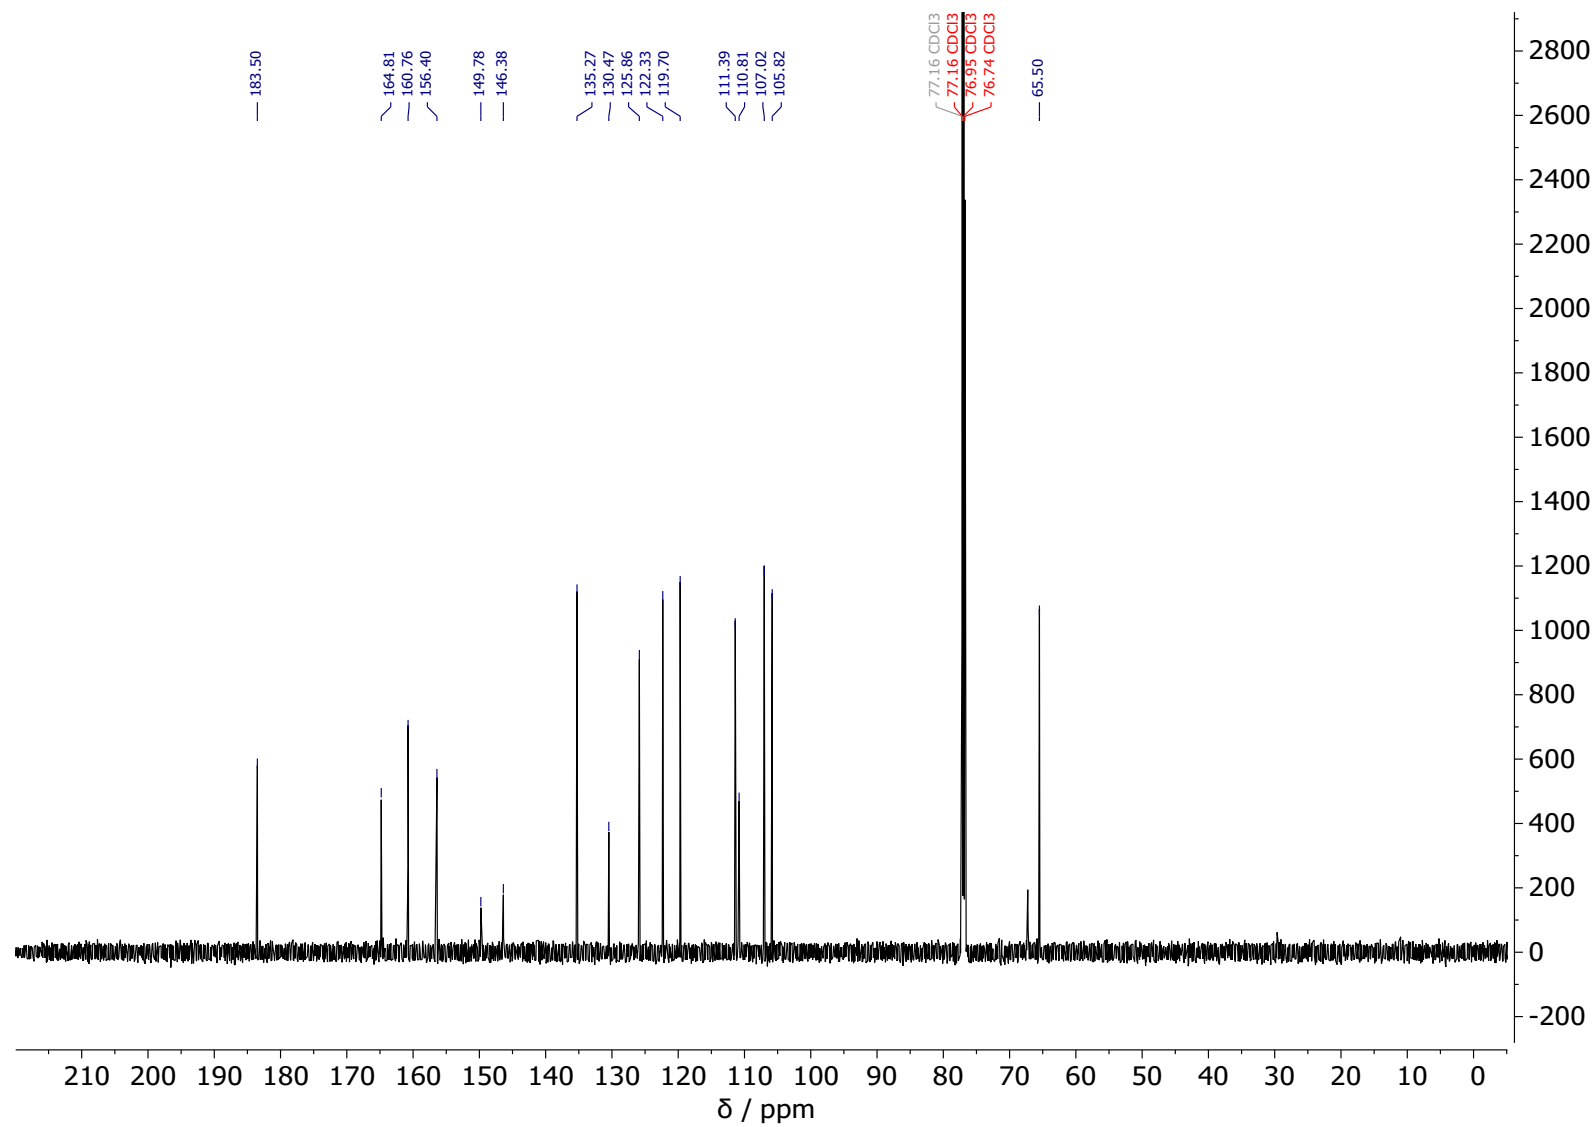

Figure S34: <sup>13</sup>C NMR spectrum of **18** (CDCl<sub>3</sub>, 151 MHz).

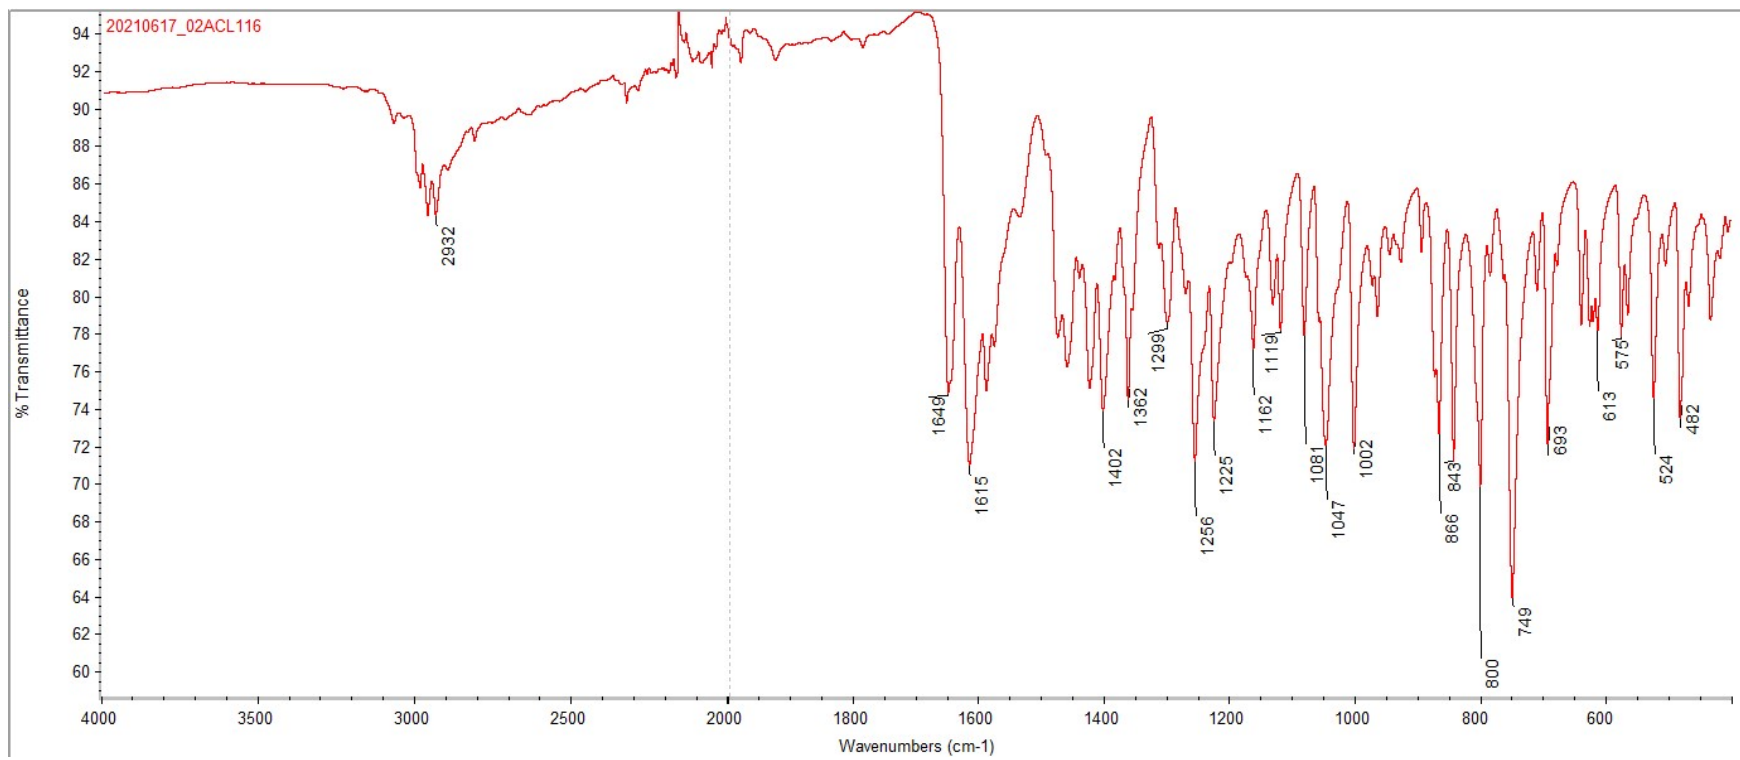

Figure S35: FT-IR Spectrum of **18**



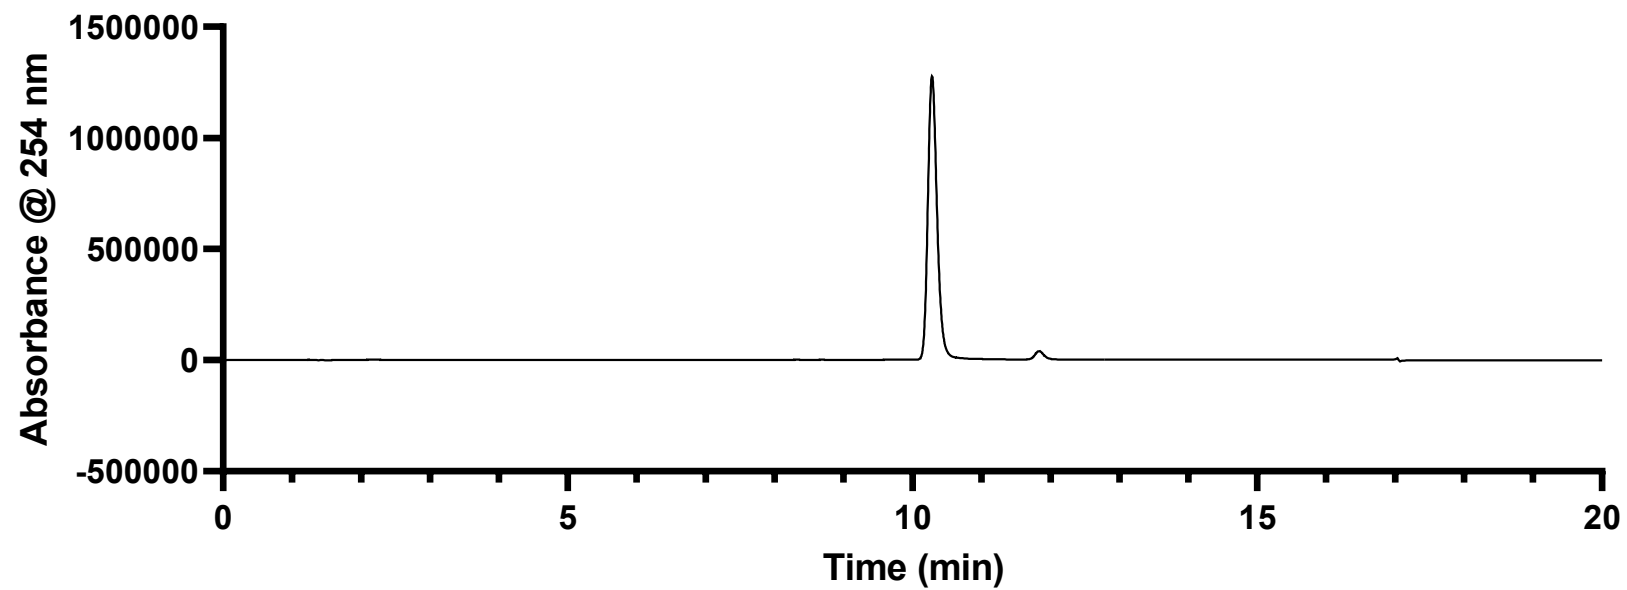

Figure S36: LC trace (254 nm detector wavelength) of **18**. The gradient was altered for this compound to ACN:H<sub>2</sub>O (0.1% formic acid) 10:90 – 80:20.

2-Acetyl-1,3-phenylene bis(2-methoxy-1,1,3,3-tetramethylisoindoline-5-carboxylate) (**19**)

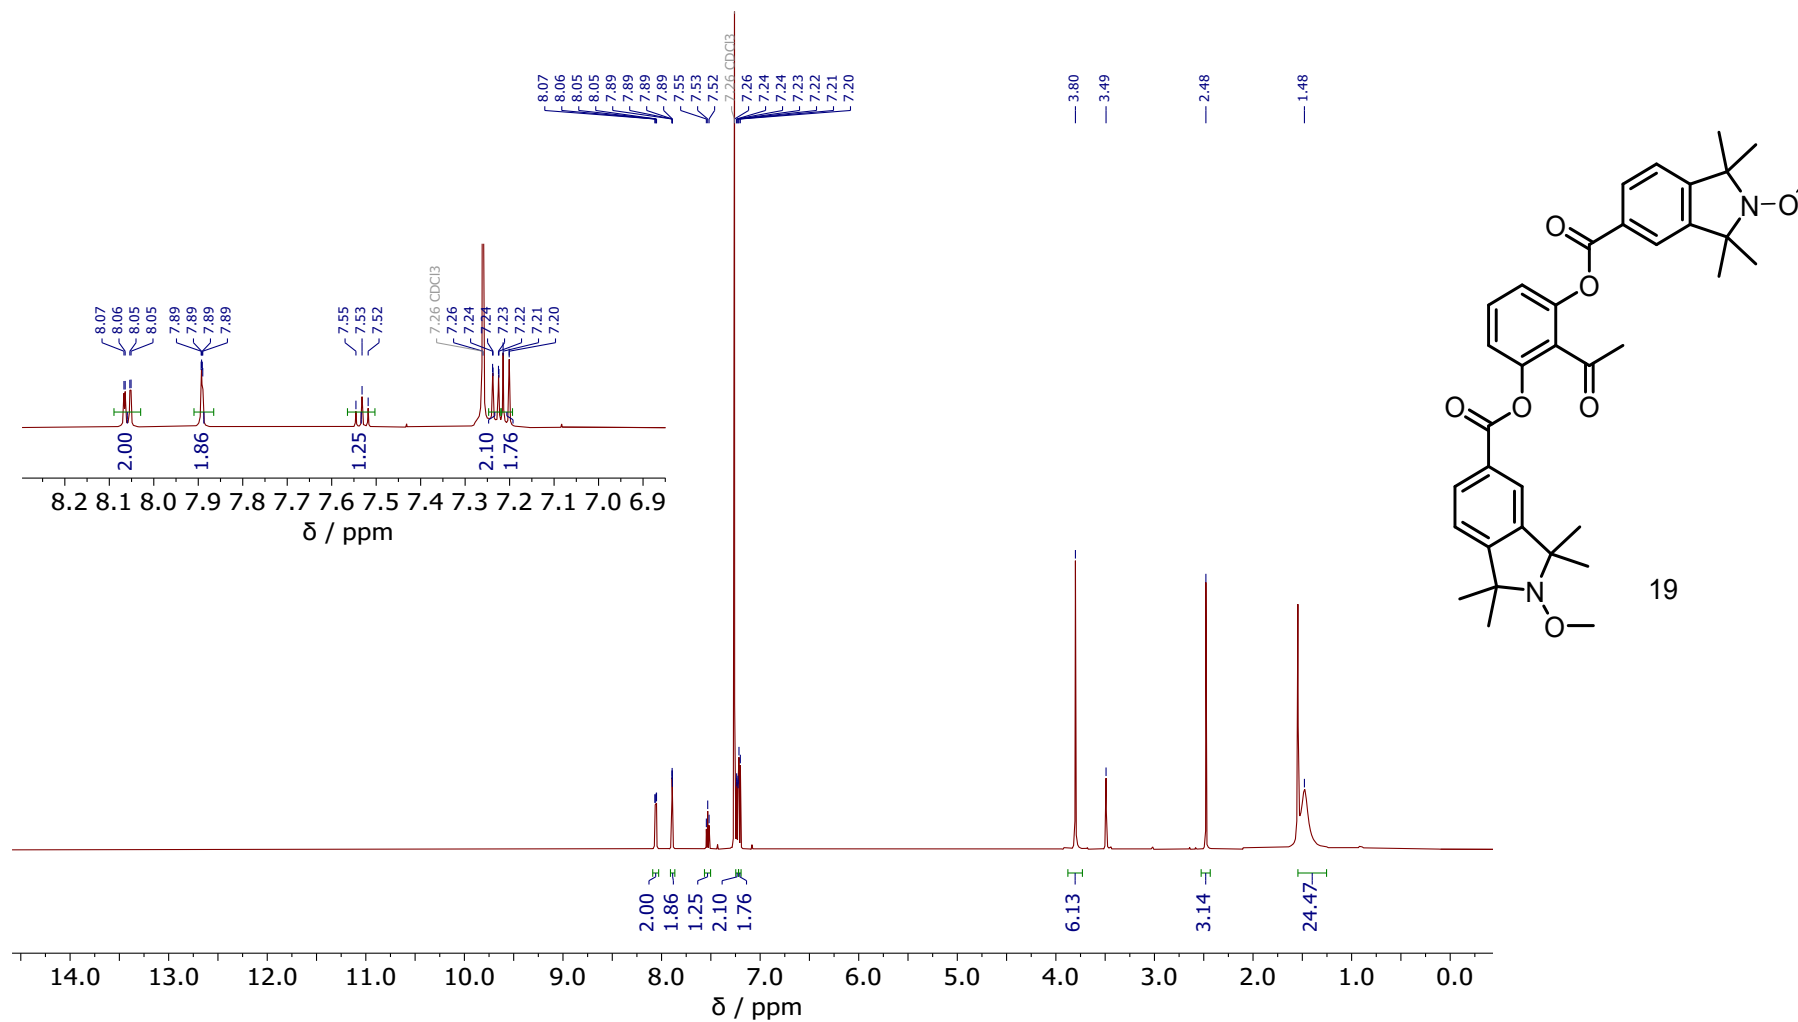

Figure S29: <sup>1</sup>H NMR spectrum of **19** (CDCl<sub>3</sub>, 600 MHz).

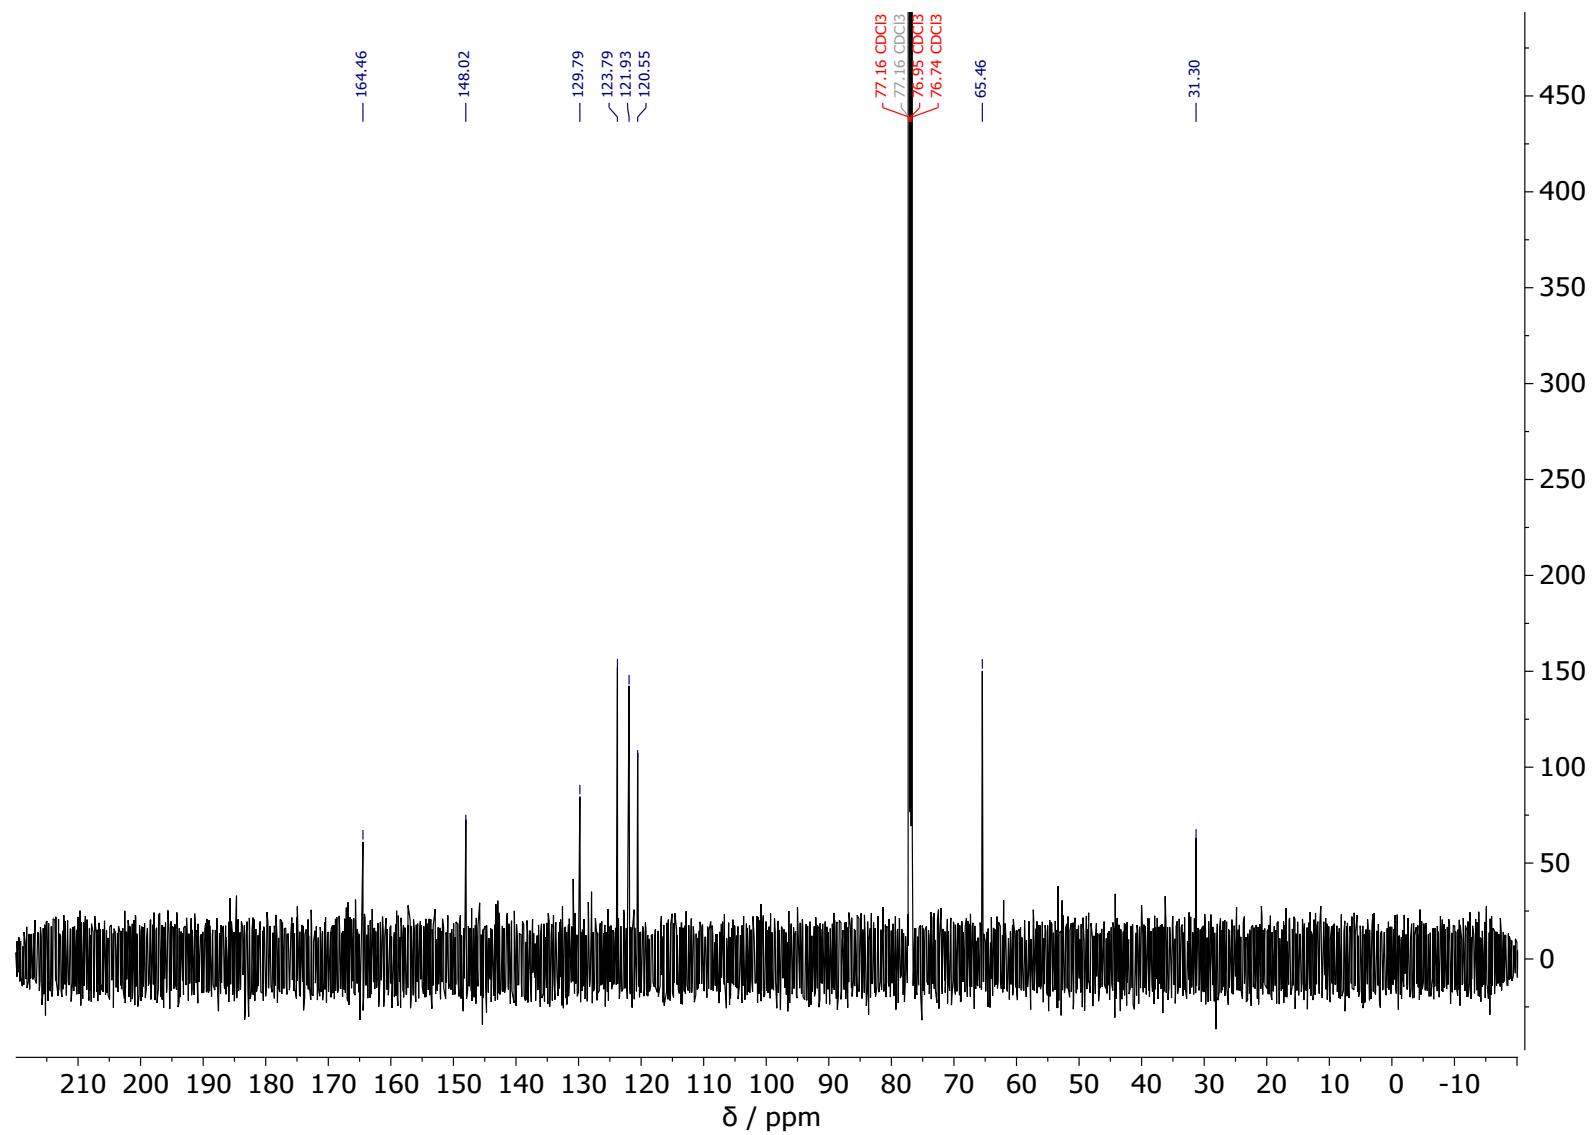

Figure S30:  $^{13}\text{C}$  NMR spectrum of **19** ( $\text{CDCl}_3$ , 151 MHz).

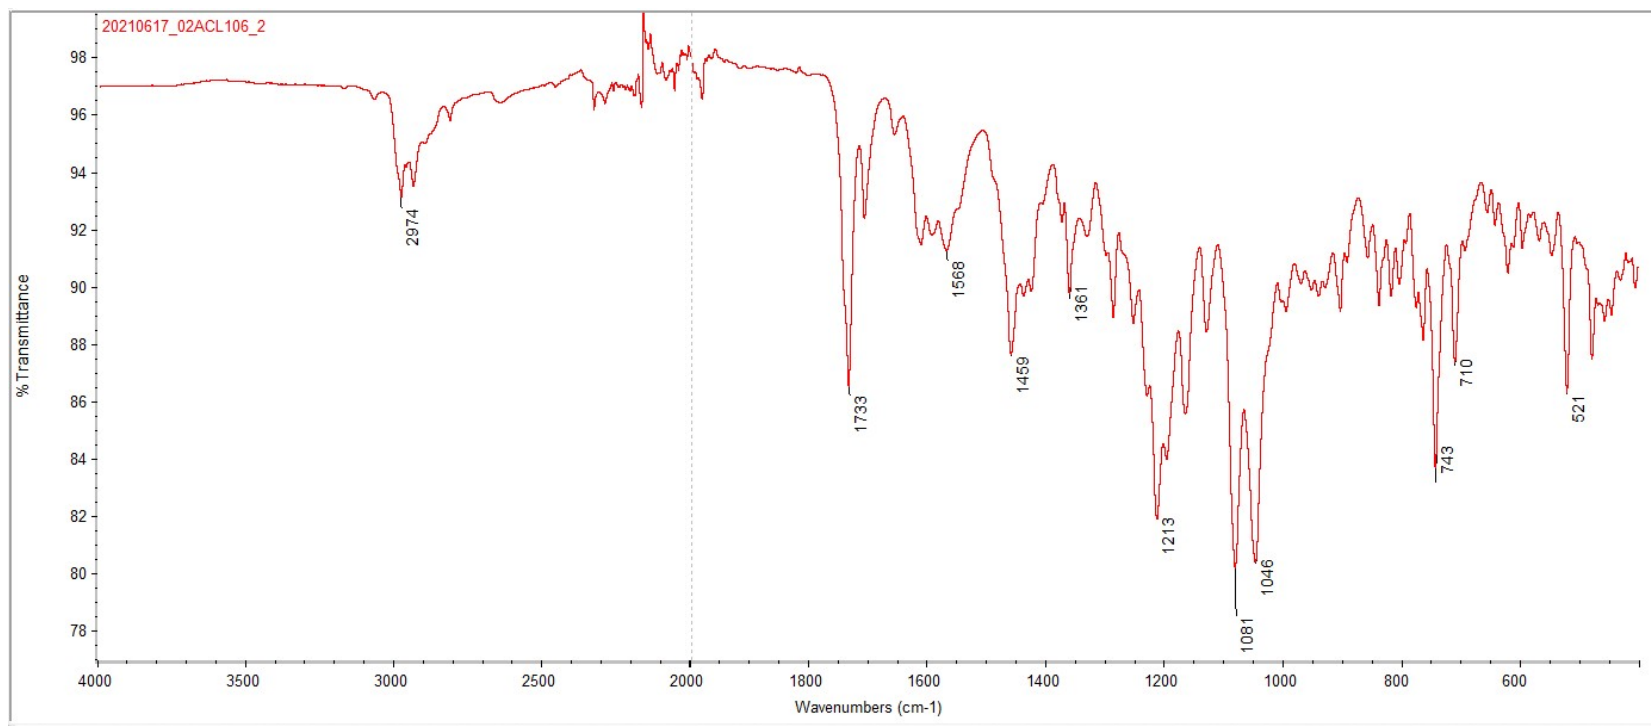

Figure S31: FT-IR spectrum of **19**.

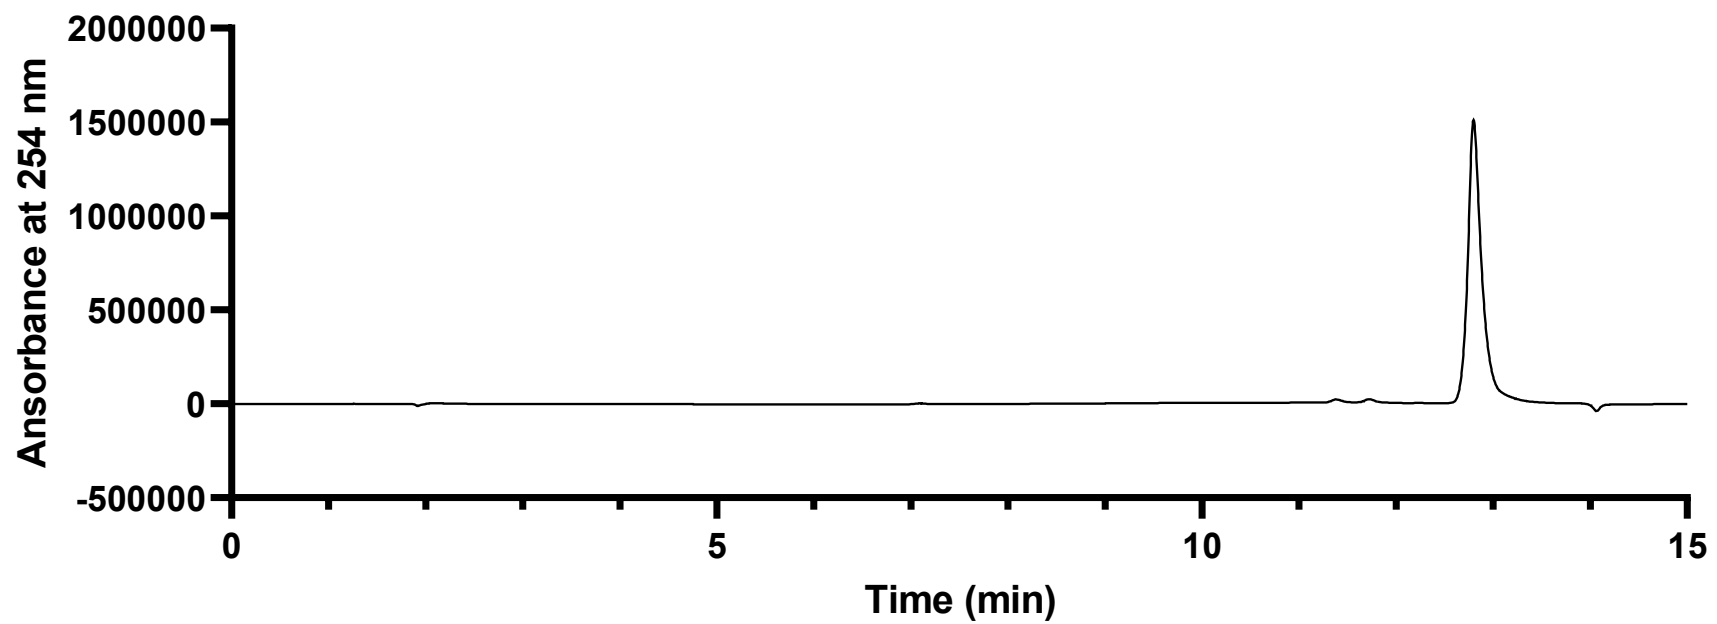

Figure S32: LC trace (254 nm detector wavelength) of **19**. The gradient was altered for this compound to ACN:H<sub>2</sub>O (0.1% formic acid) 10:90 – 80:20.

5-Hydroxy-2-(2-methoxy-1,1,3,3-tetramethylisoindolin-5-yl)-3-(2-methoxy-1,1,3,3-tetramethylisoindoline-5-carbonyl)-4H-chromen-4-one (20)

20210107\_02ACL108.90.fid  
02ACL108\_F18-25  
PROTONRO CDCl3 {C:\Data\Chemists} AstridL 1

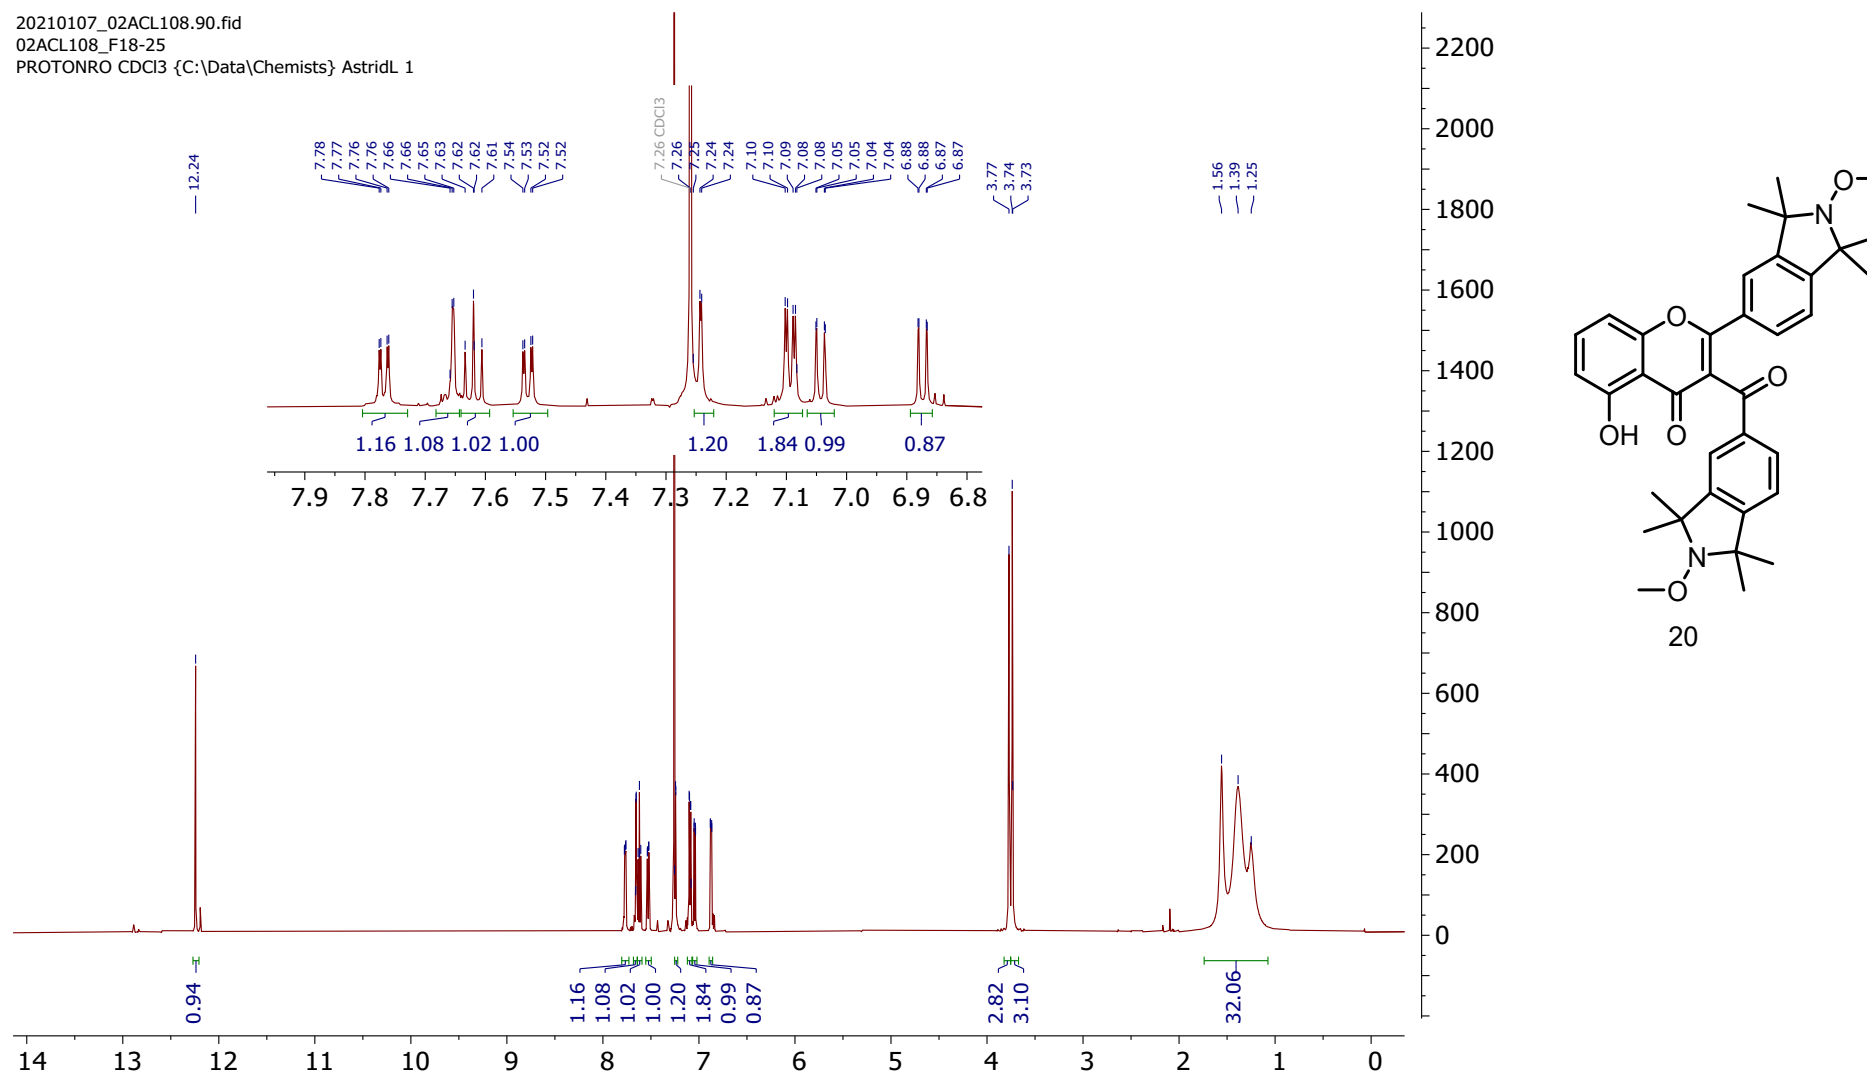

Figure S37: <sup>1</sup>H NMR spectra of **20** (CDCl<sub>3</sub>, 600 MHz).

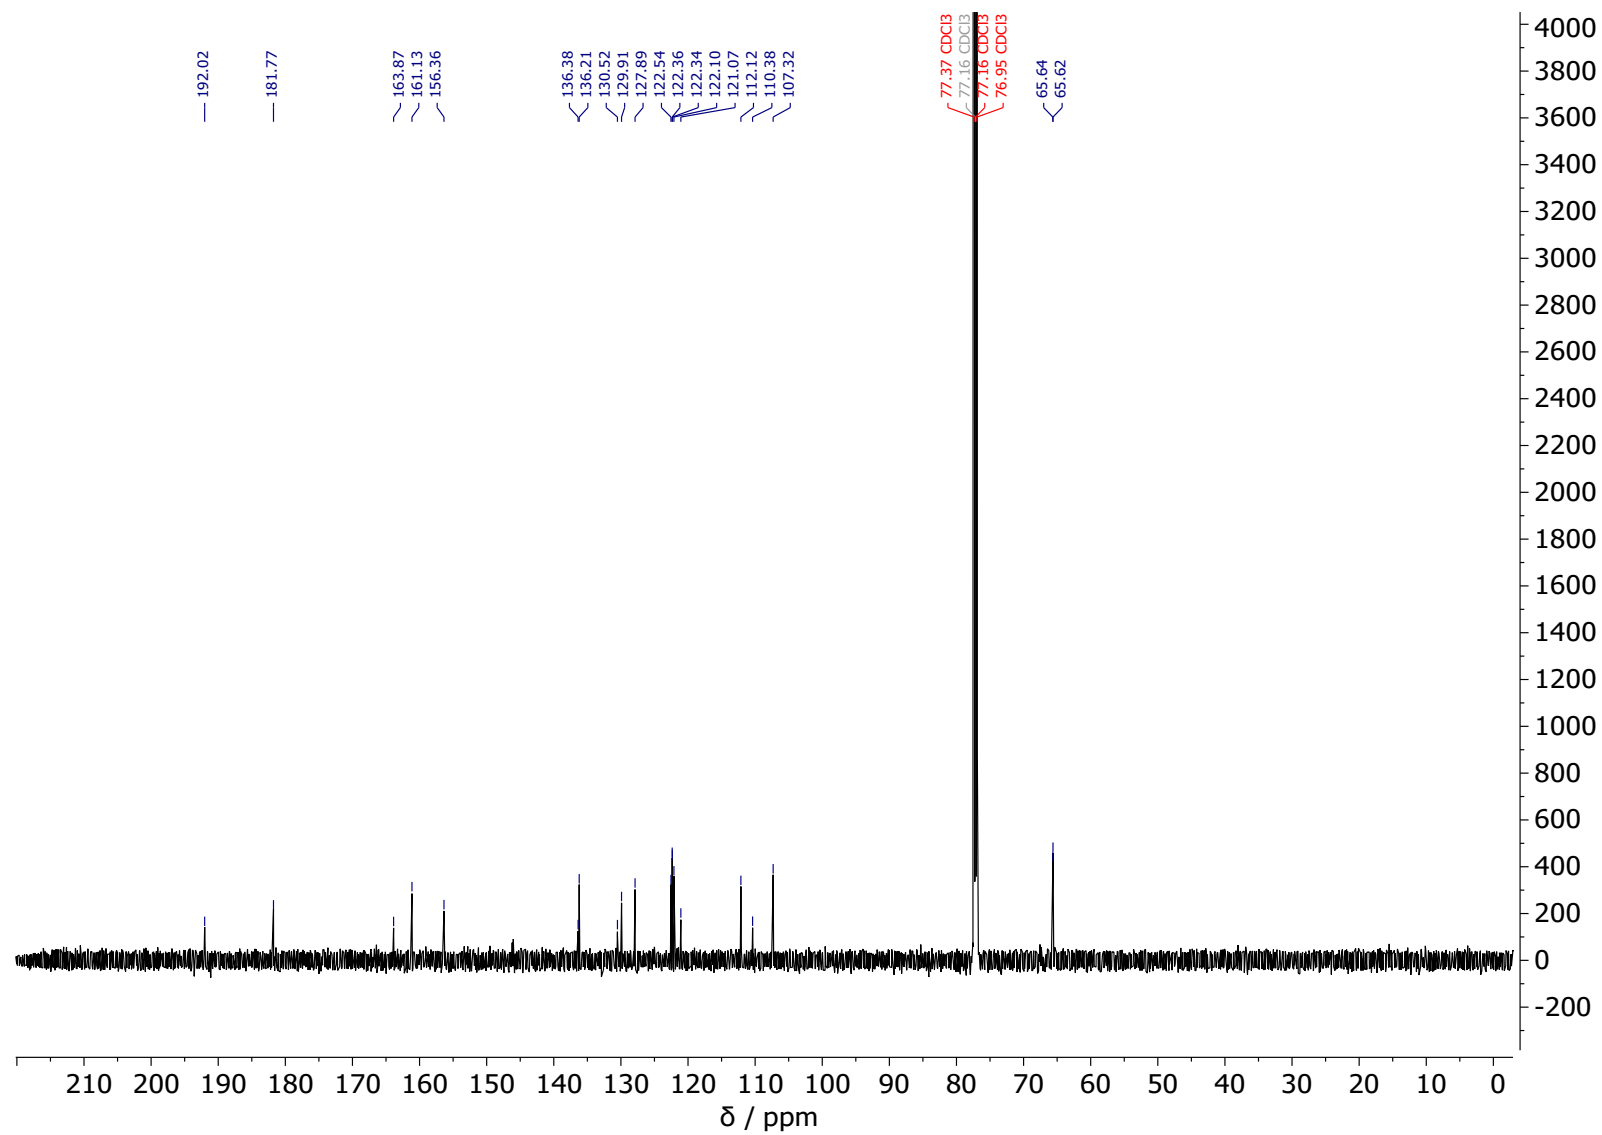

Figure S38:  $^{13}\text{C}$  NMR spectrum of **20** ( $\text{CDCl}_3$ , 151 MHz).

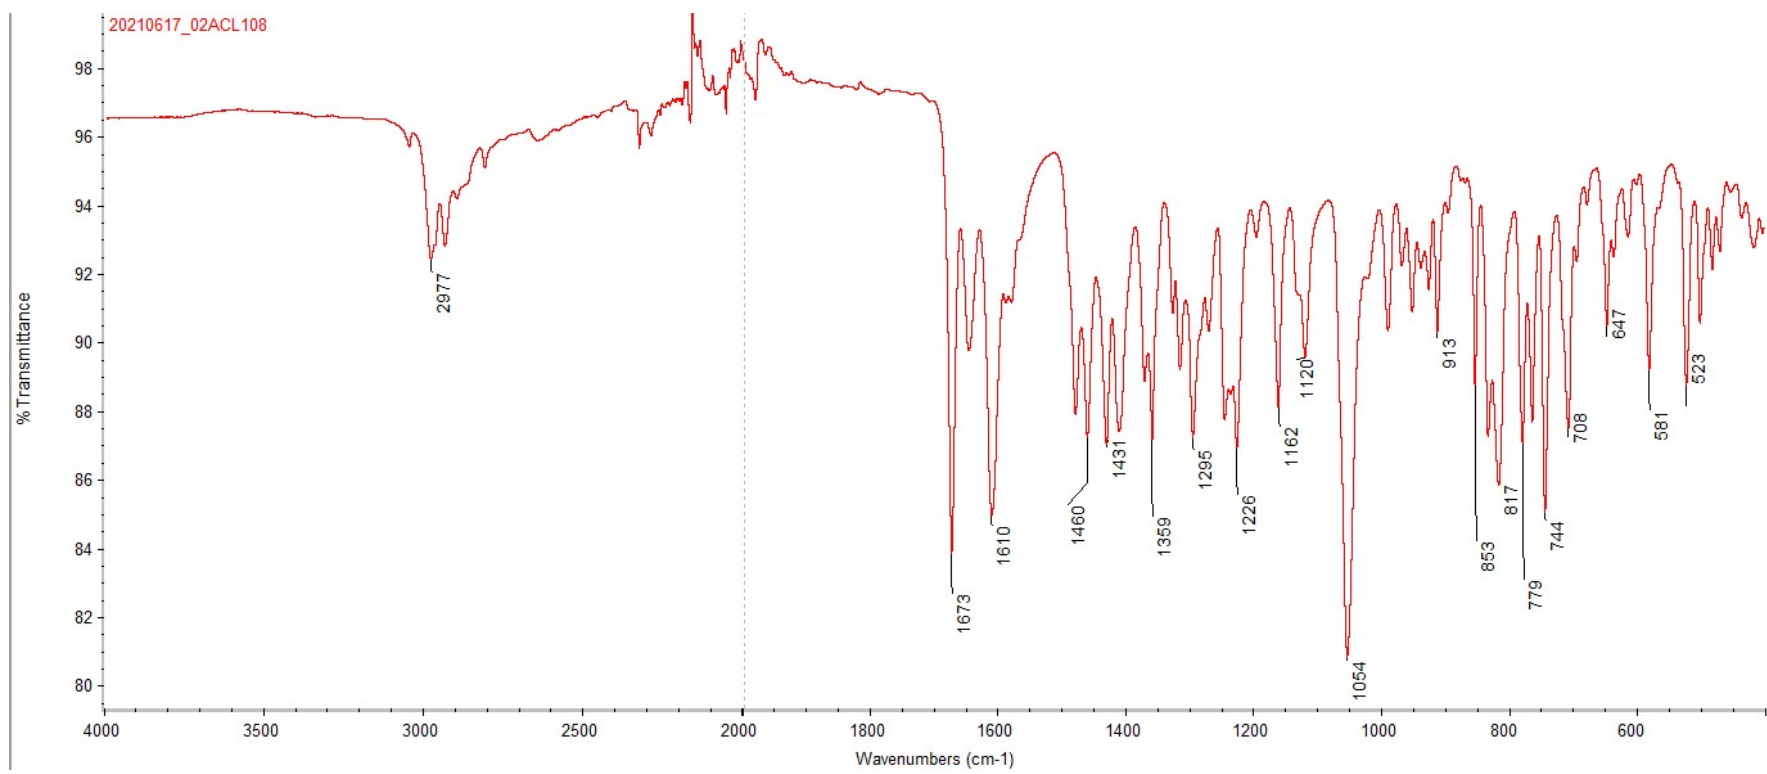

Figure S39: FT-IR spectrum of **20**



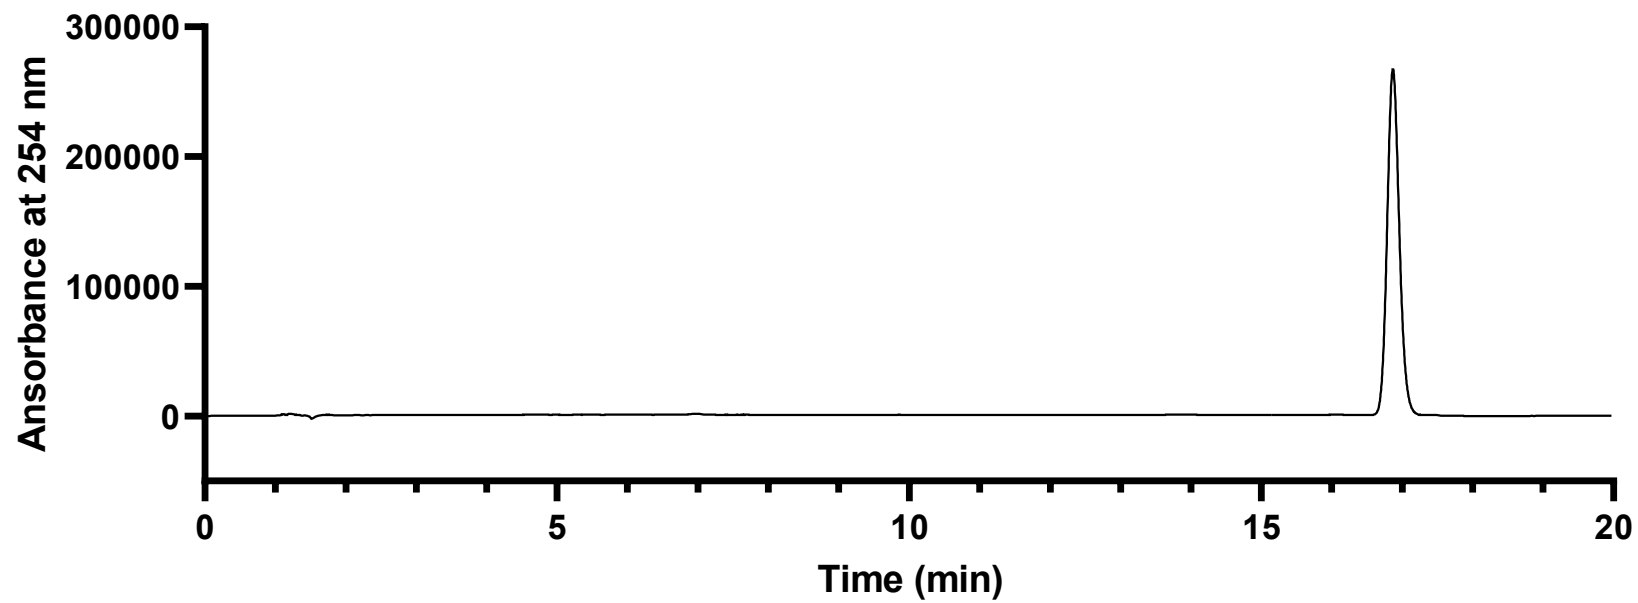

Figure S40: LC trace (254 nm detector wavelength) of **20**. The gradient was altered for this compound to ACN:H<sub>2</sub>O (0.1% formic acid) 10:90 – 80:20.

# 5-Hydroxy-2-(1,1,3,3-tetramethylisoindolin-2-oxyl)-4H-chromen-4-one (7)

20210506\_02ACL125.20.fid  
02ACL125\_F10-15  
PROTONRO CDCl3 {C:\Data\Chemists} AstridL 23

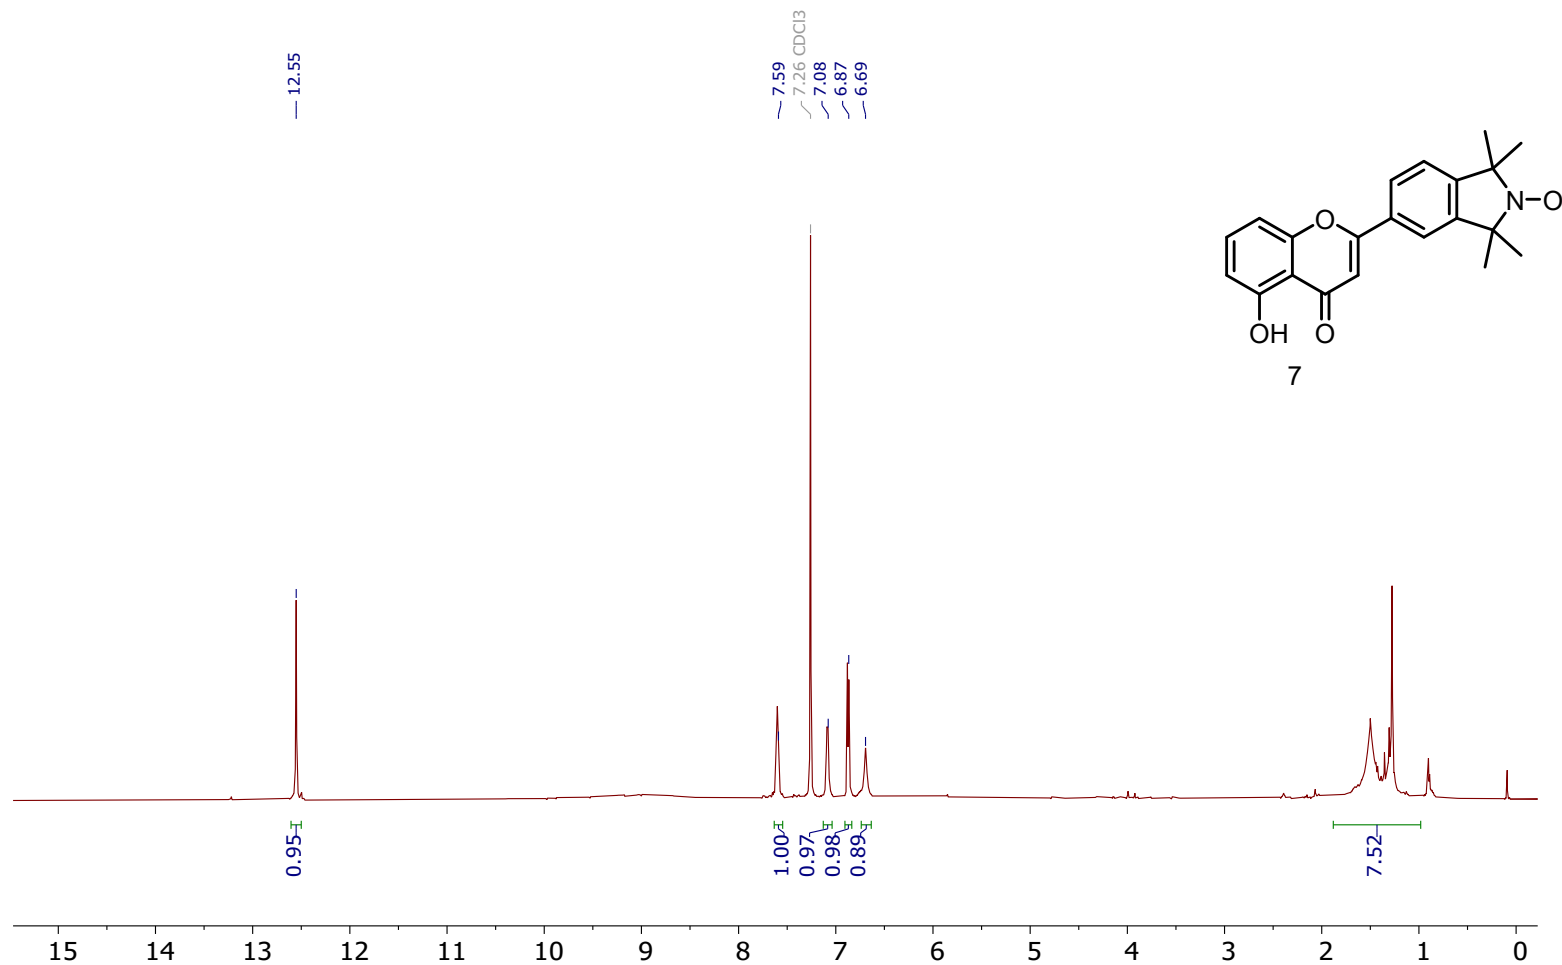

Figure S41:  $^1\text{H}$  NMR spectra of **7** ( $\text{CDCl}_3$ , 600 MHz). *Note:* Nitroxide radicals often cause broad NMR signals, inaccurate integration, and missing integrals.

20210506\_02ACL125.21.fid  
02ACL125\_F10-15  
C13CPD CDCl3 {C:\Data\Chemists} AstridL 23

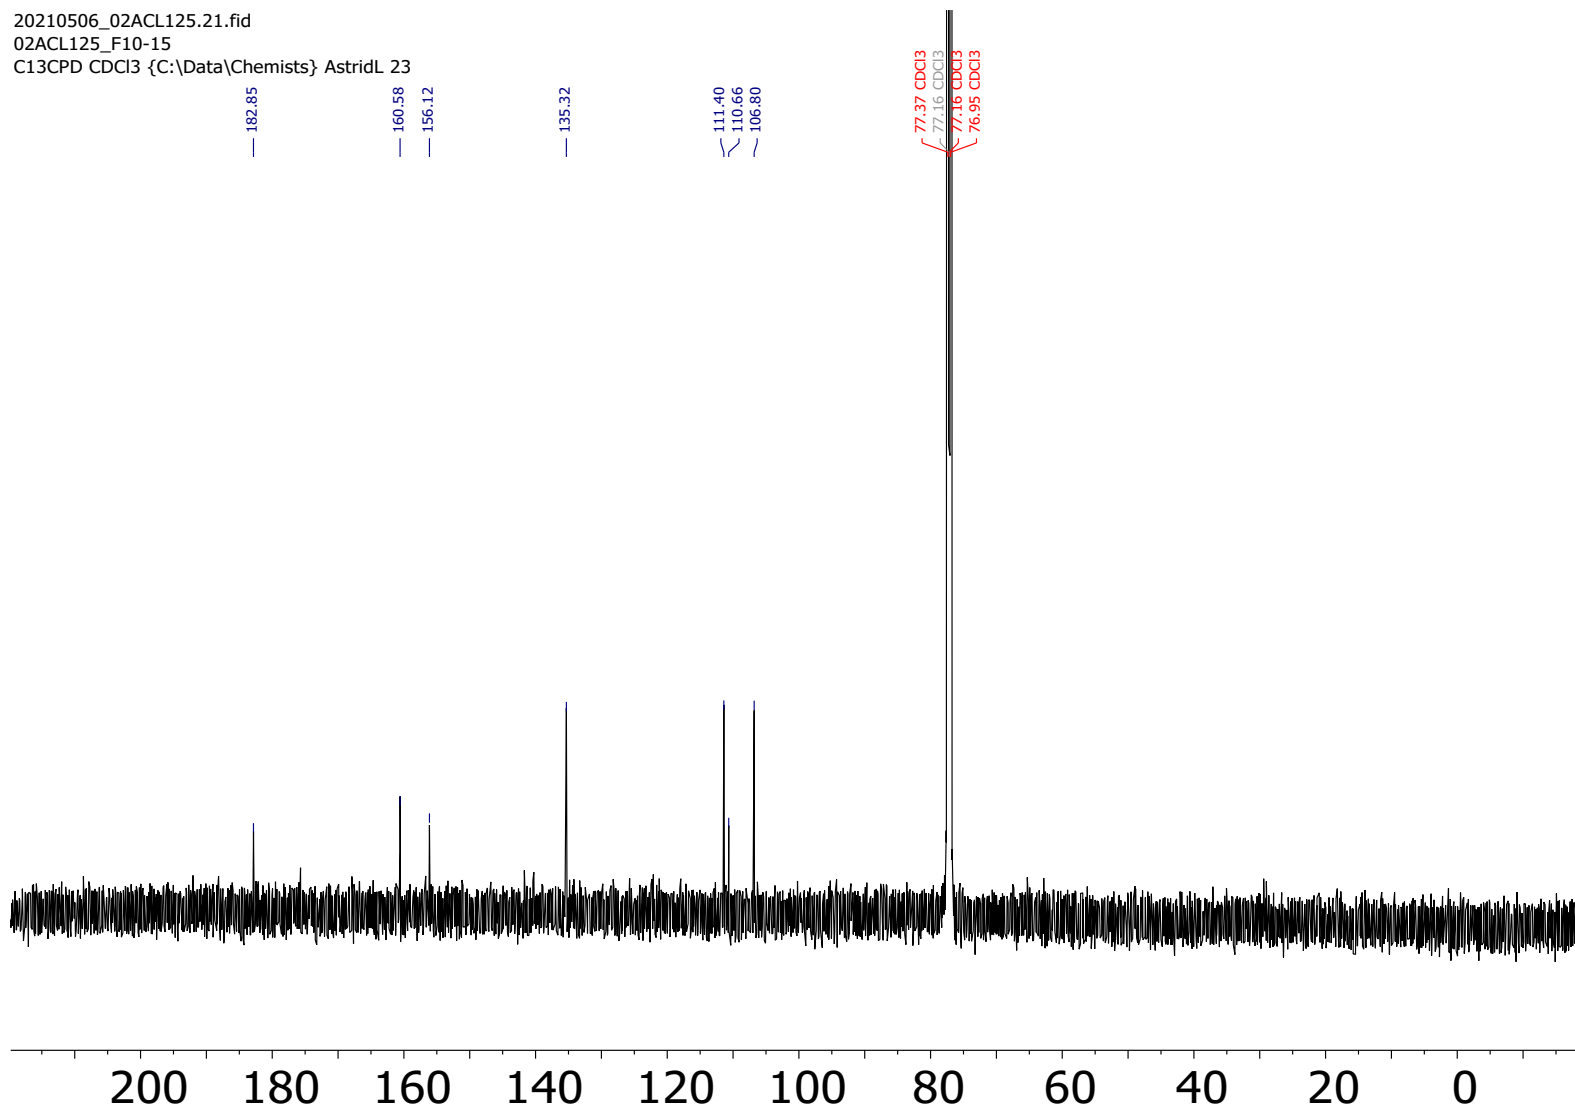

Figure S42:  $^{13}\text{C}$  NMR spectrum of **7** ( $\text{CDCl}_3$ , 151 MHz). *Note:* Nitroxide radicals often cause broad NMR signals, inaccurate integration, and missing integrals.

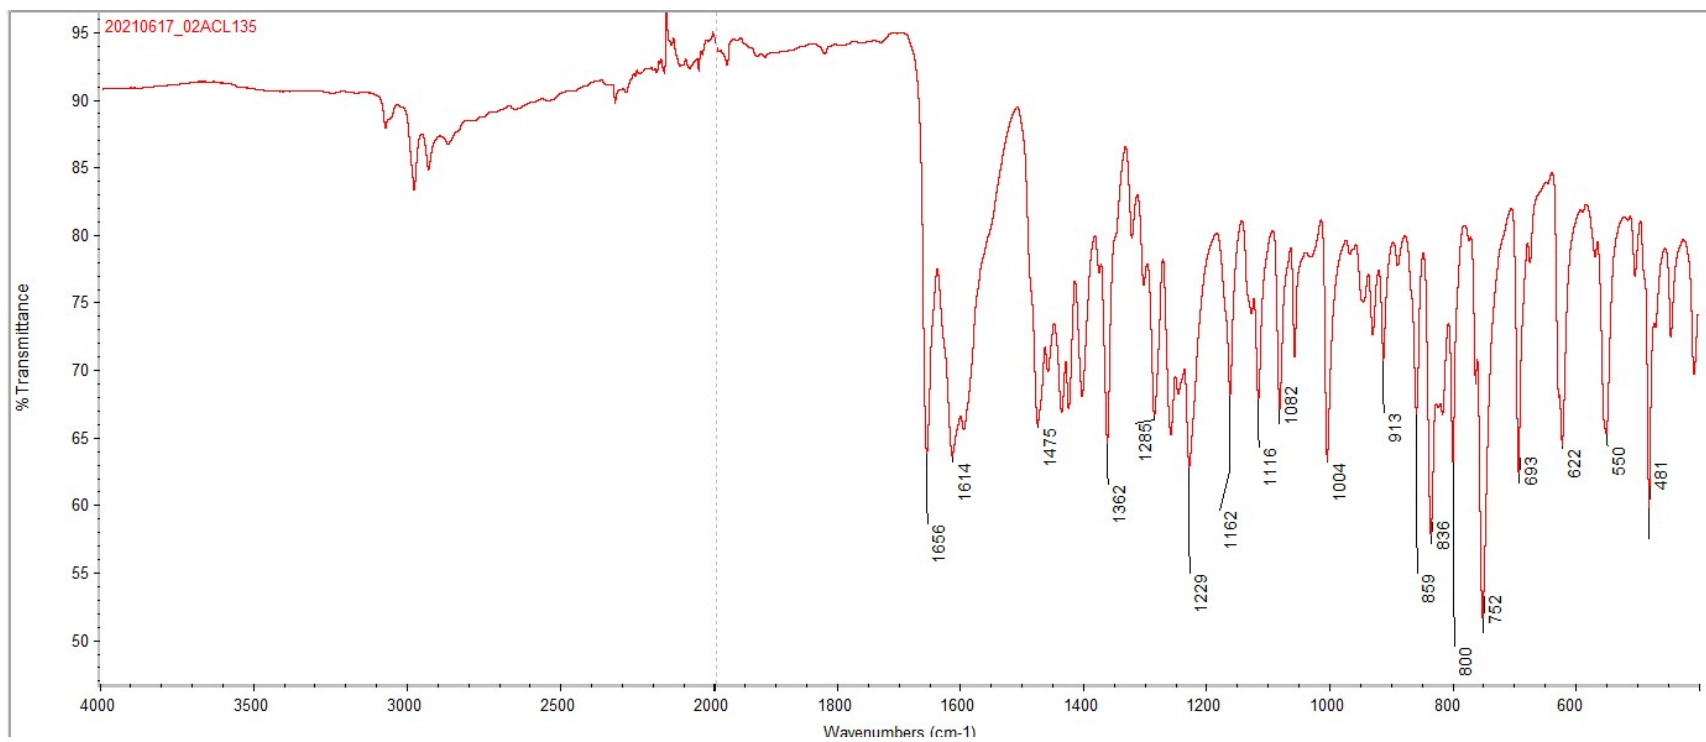

Figure S43: FT-IR spectrum of 7

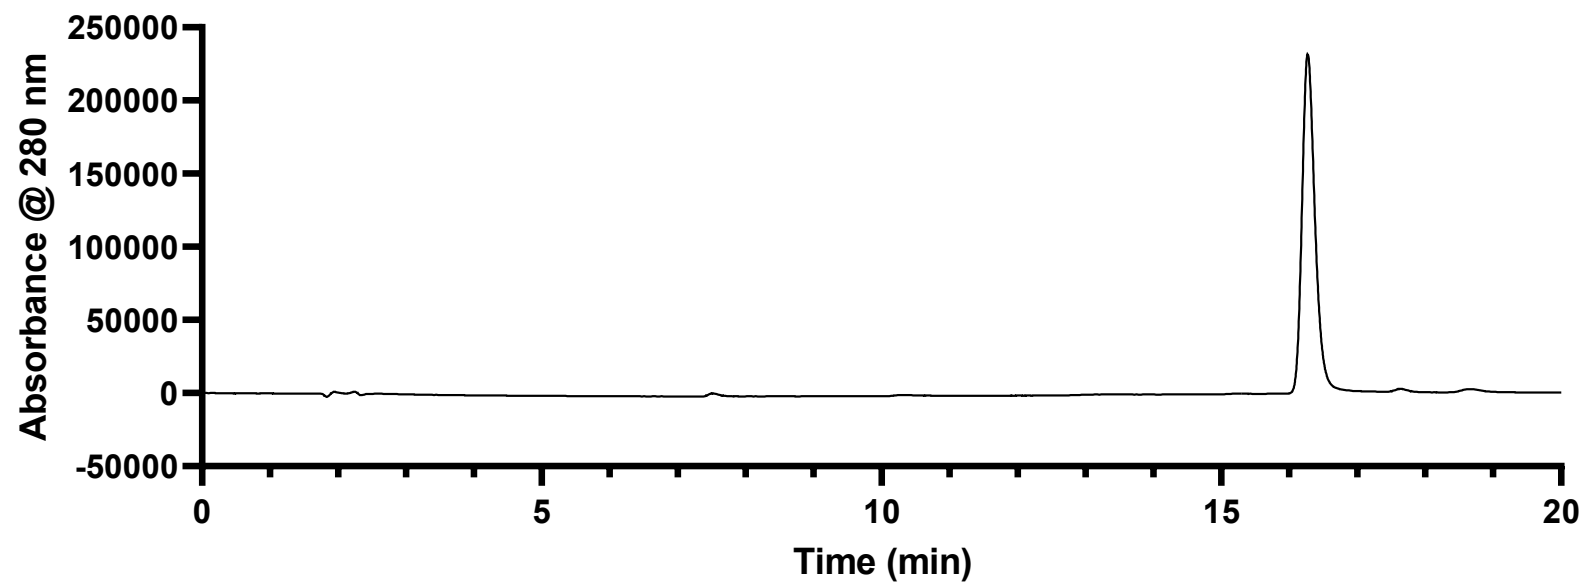

Figure S44: LC trace (280 nm detector wavelength) of 7. The gradient was altered for this compound to ACN:H<sub>2</sub>O (0.1% formic acid) 10:90 – 80:20.

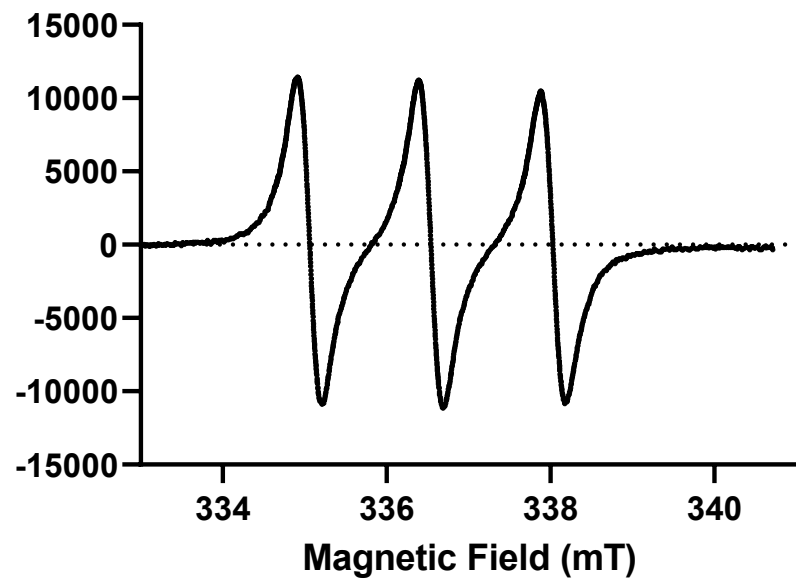

Figure S45: EPR spectrum of **7** in  $\text{CDCl}_3$  ( $a_N = 1.48$  mT,  $T = 298$  K)

5-Hydroxy-2-(1,1,3,3-tetramethylisoinдолin-2-oxyl)-3-(1,1,3,3-tetramethylisoinдолin-2-oxyl-5-carbonyl)-4H-chromen-4-one (9)

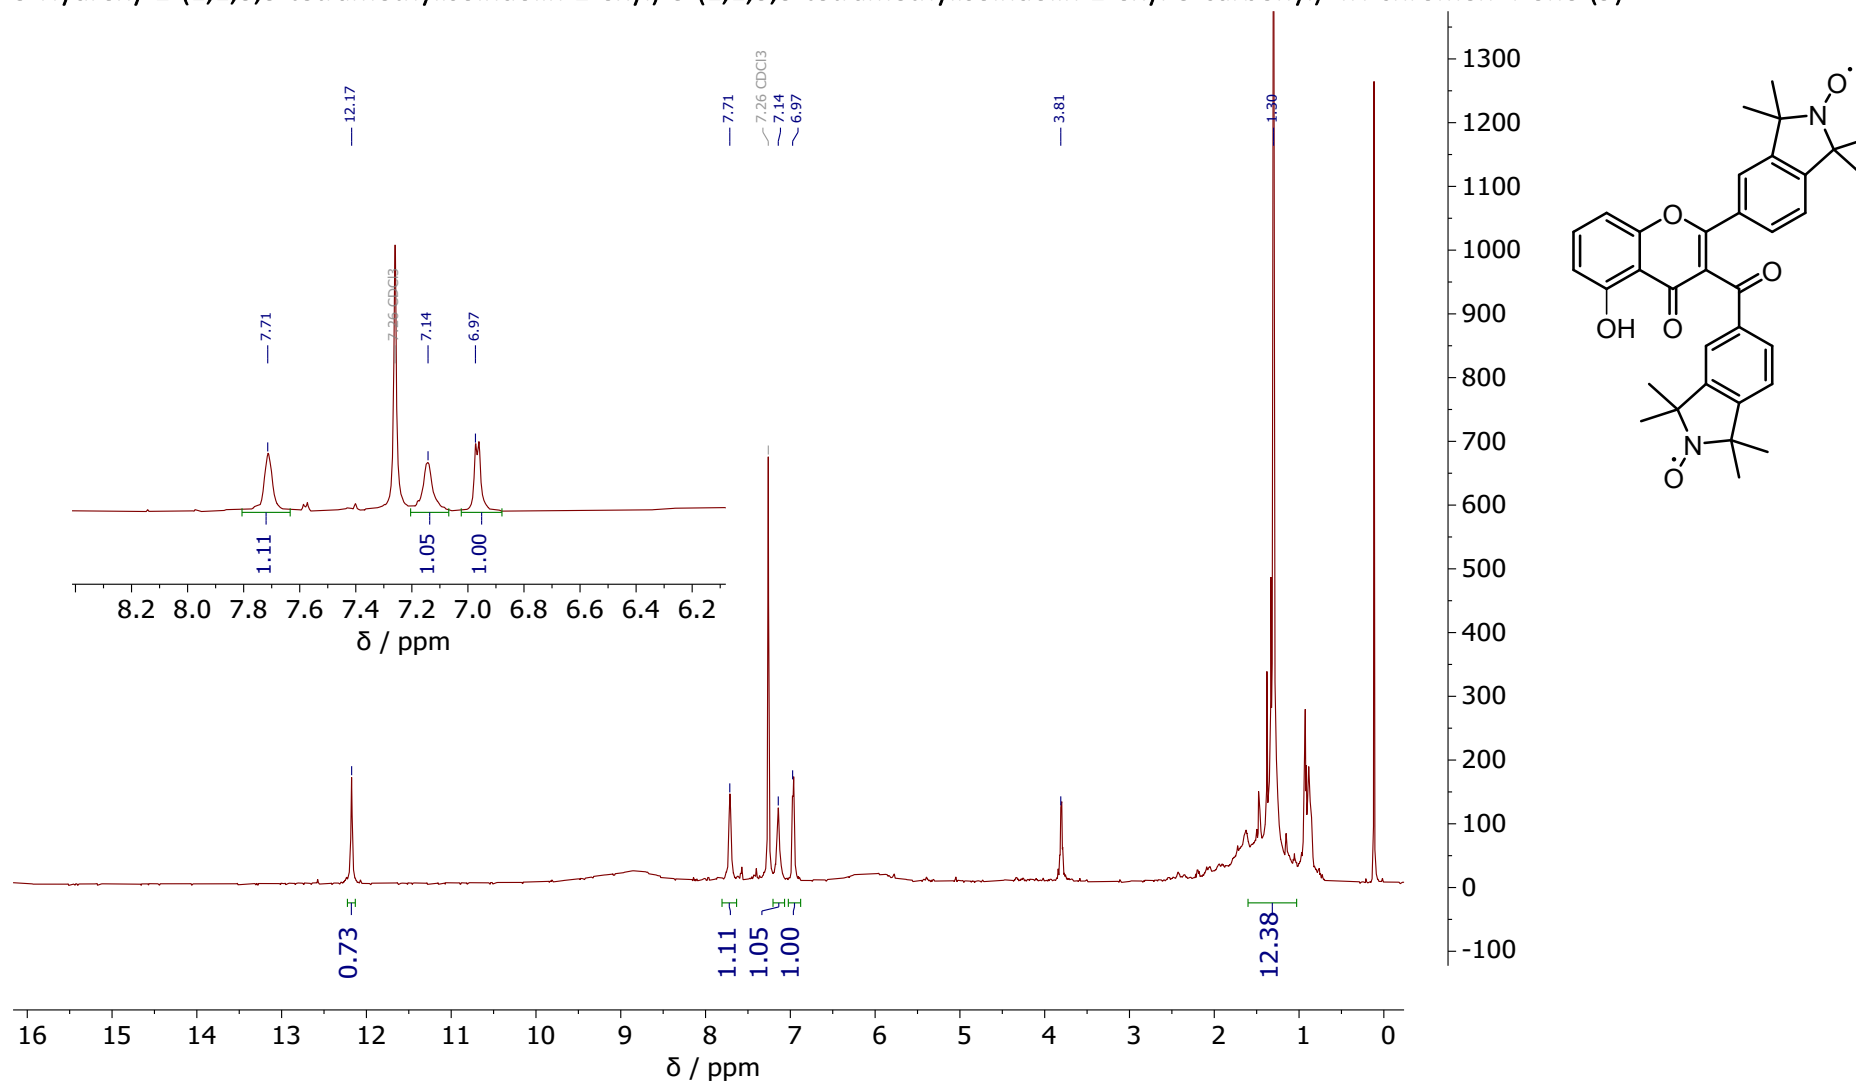

Figure S46: <sup>1</sup>H NMR spectrum of 9 (CDCl<sub>3</sub>, 600 MHz). Note: Nitroxide radicals often cause broad NMR signals, inaccurate integration, and missing integrals.

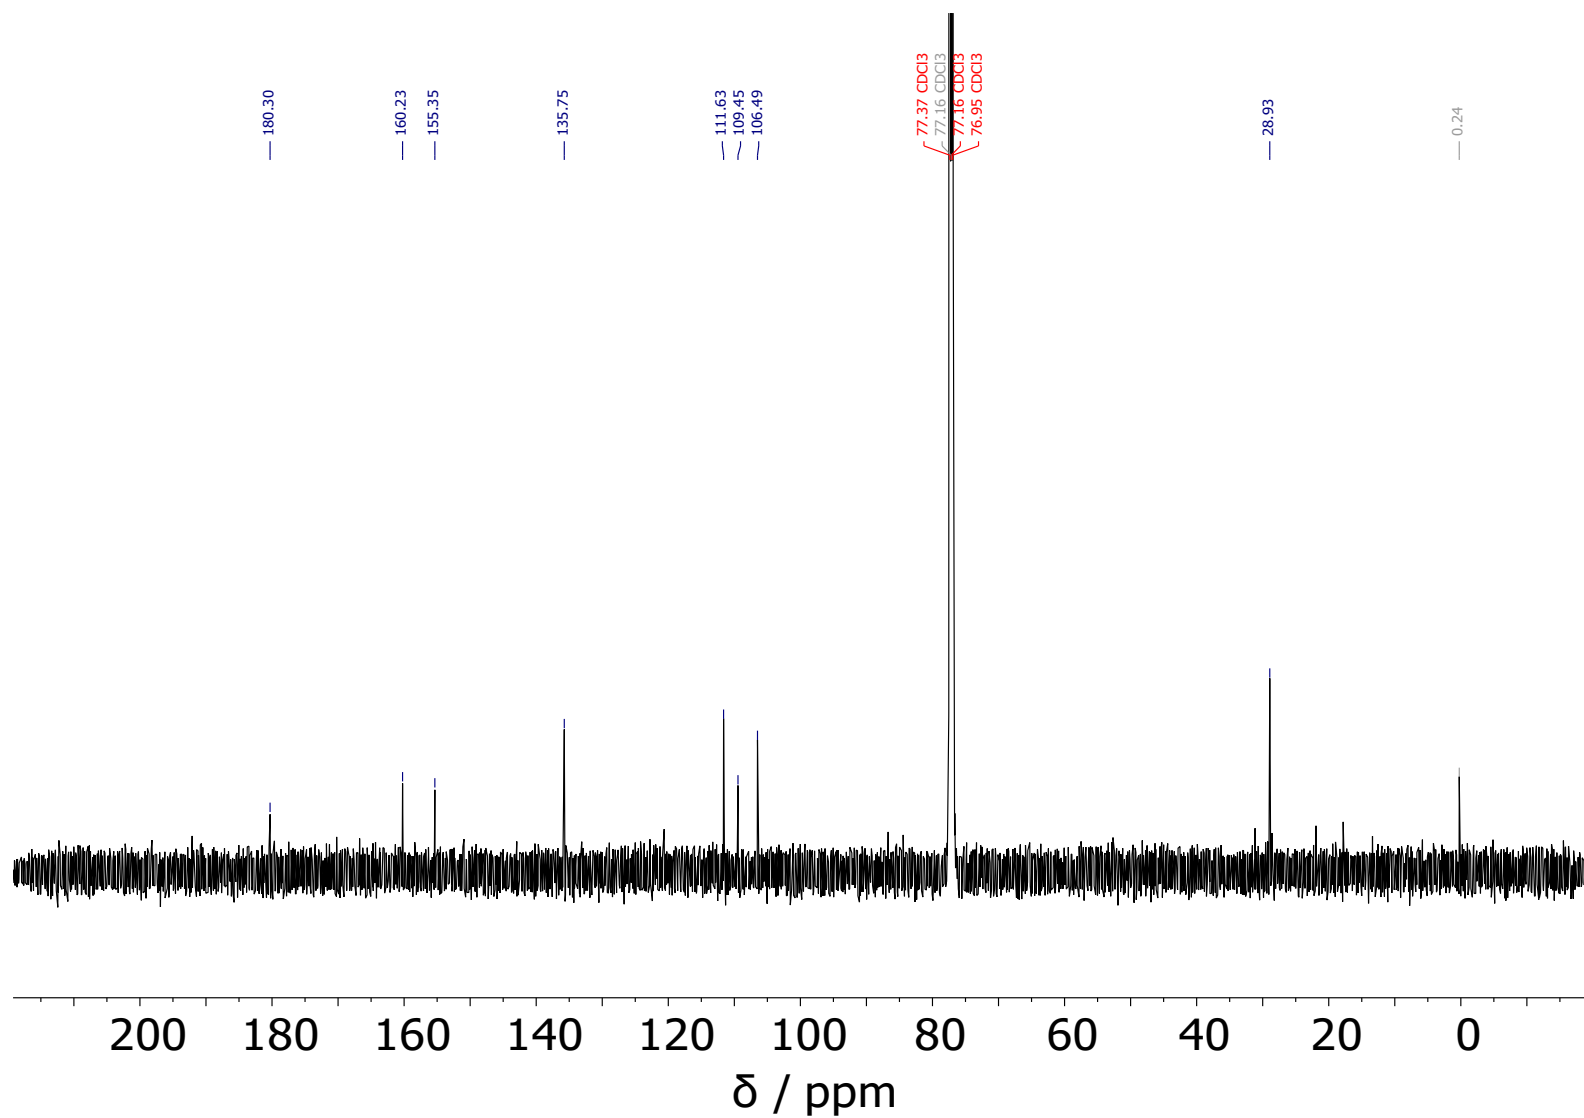

Figure S47:  $^{13}\text{C}$  NMR spectrum of **9** ( $\text{CDCl}_3$ , 151 MHz). *Note:* Nitroxide radicals often cause broad NMR signals, inaccurate integration, and missing integrals.



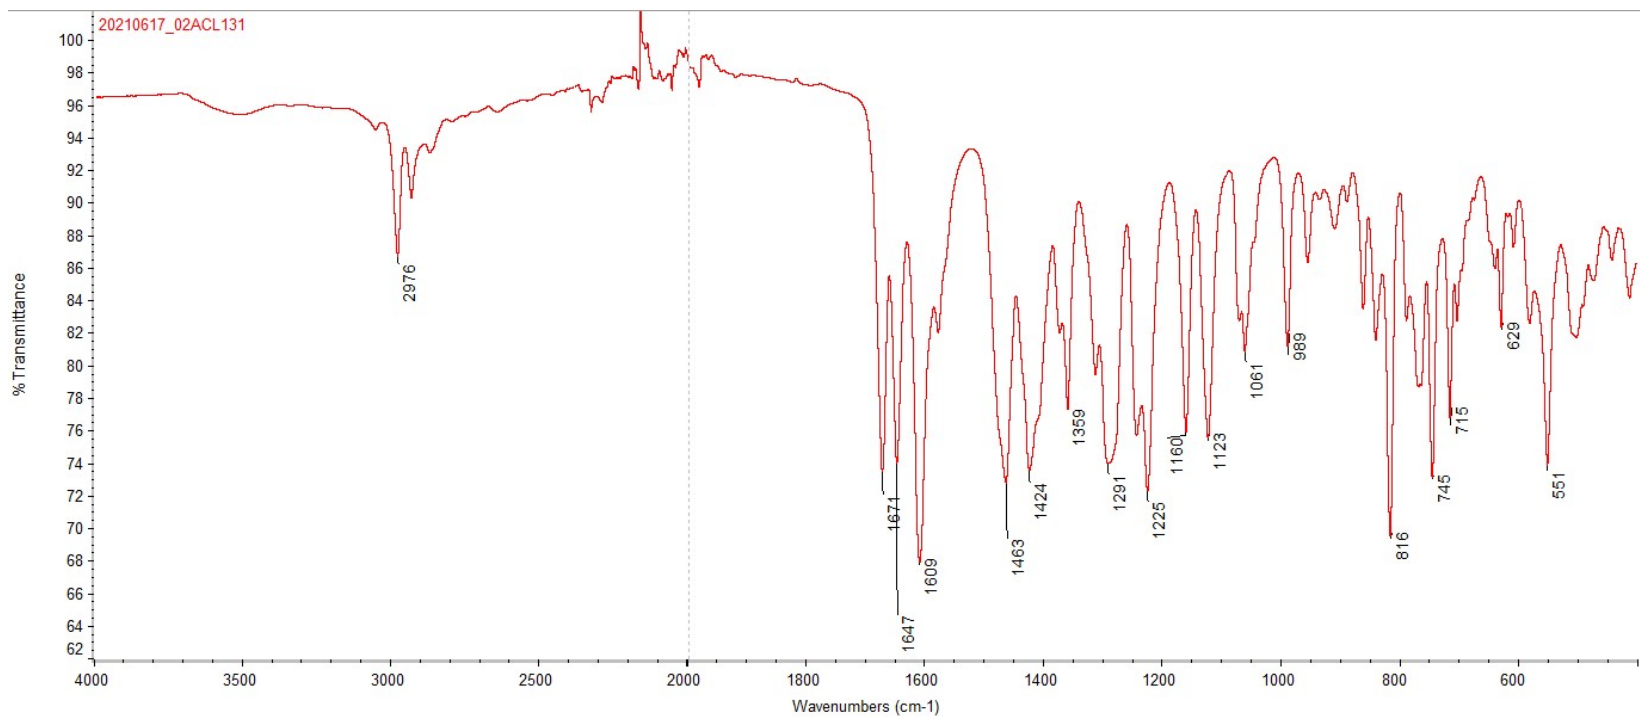

Figure S48: FT-IR spectrum of **9**

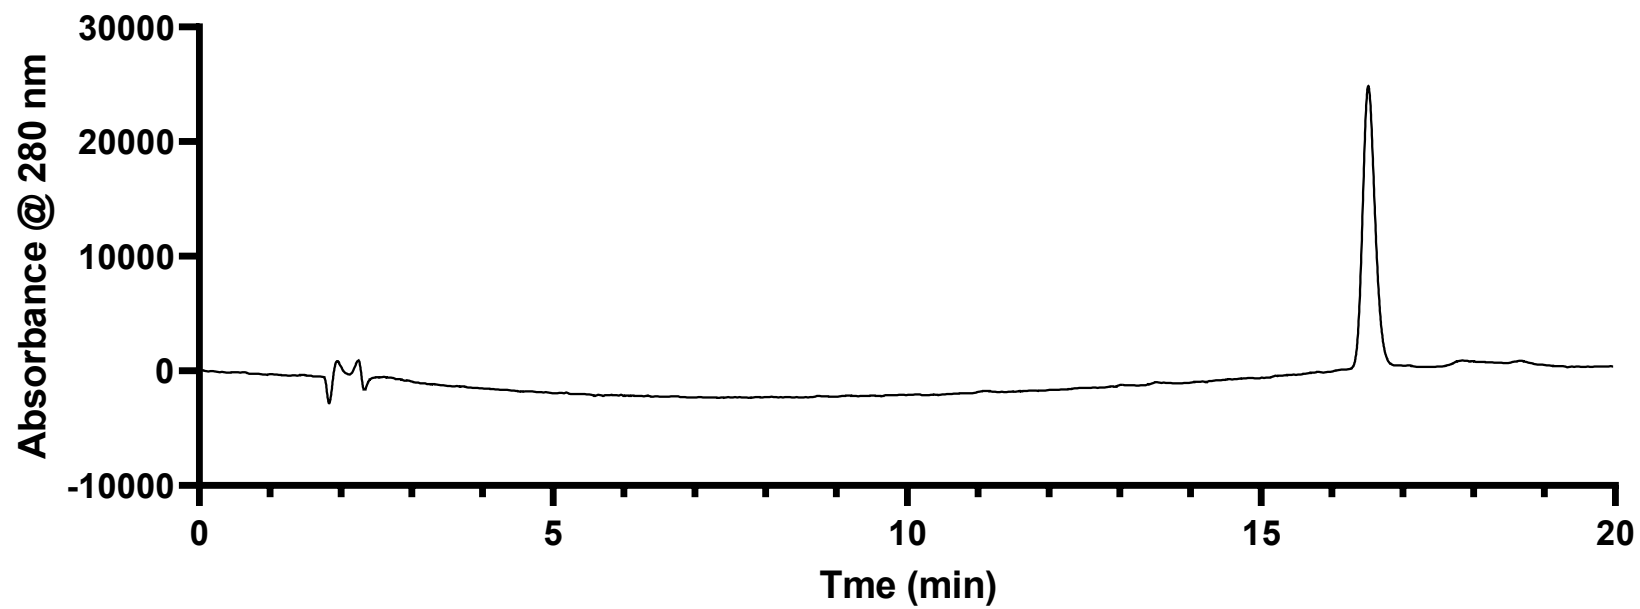

Figure S49: LC trace (280 nm detector wavelength) of **9**. The gradient was altered for this compound to ACN:H<sub>2</sub>O (0.1% formic acid) 10:90 – 80:20.

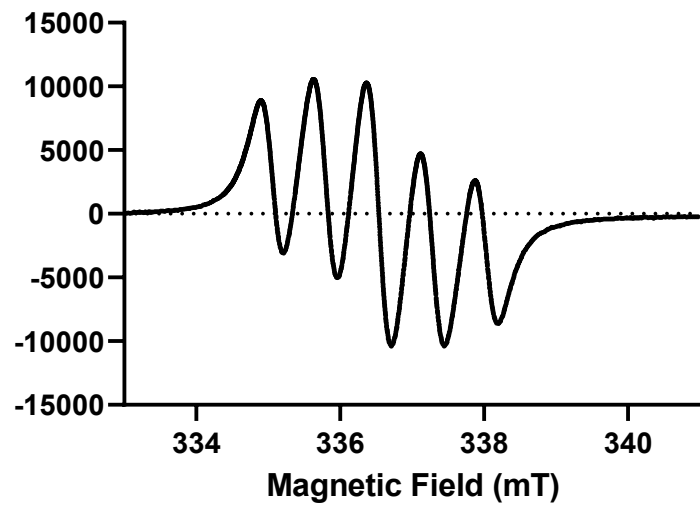

Figure S50: EPR spectrum of **9** in  $\text{CDCl}_3$  ( $a_N = 1.45$  mT,  $T = 298$  K)

## Single Crystal X-ray Diffraction Experimental

Single Crystal X-ray Diffraction (SCXRD) data were collected for **7**, **9** and **20** at the Australian Synchrotron MX2 beamline<sup>[1]</sup> at 100(2) K using a wavelength of  $\lambda = 0.7108$  Å. Synchrotron data acquisition was carried out using AS QEGUI<sup>[2]</sup> and subsequent data indexation, reduction and integration was performed with XDS.<sup>[3]</sup> Data for **18** were collected using a RigakuOD XtaLAB Synergy at 150(2) K with micro-focused MoK $\alpha$  radiation ( $\lambda = 0.71073$ ) Å. Acquisition, indexation, reduction and integration for **18** were performed with the CrysAlis software package<sup>[4]</sup> and a multi-scan absorption correction applied through the use of spherical harmonics, implemented in the SCALE 3 ABSPACK scaling algorithm. The structure was solved using SHELXT<sup>[5]</sup> and subsequent modelling was carried out using SHELXL<sup>[6]</sup> within the Olex2<sup>[7]</sup> graphical user interface. Full occupancy non-hydrogen atoms were refined with anisotropic thermal displacement parameters, without applying rigid positional constraints. Disordered non-hydrogen atoms were modelled isotropically with occupancies refined through the use free variables. C–H hydrogen atoms were included in idealized positions and a riding model was used for their refinement. The positions of O–H hydrogen atoms were modelled using residual electron density present in the difference Fourier map along with a riding model. The O atom unique to the small component of oxidised product present in **20** (O4) was modelled anisotropically with an occupancy of 0.25 reflecting the residual electron density at this site. The CIF files have been deposited into the Cambridge Structural Database (reference numbers 2218184 - 2218187).

Table S1: Crystal and refinement data for **7**, **9**, **18** and **20**.

|                                            | <b>7</b>                                        | <b>9</b>                                                      | <b>18</b>                                       | <b>20</b>                                                                                                                                                            |
|--------------------------------------------|-------------------------------------------------|---------------------------------------------------------------|-------------------------------------------------|----------------------------------------------------------------------------------------------------------------------------------------------------------------------|
| Formula                                    | C <sub>21</sub> H <sub>20</sub> NO <sub>4</sub> | C <sub>34</sub> H <sub>34</sub> N <sub>2</sub> O <sub>6</sub> | C <sub>22</sub> H <sub>23</sub> NO <sub>4</sub> | (C <sub>36</sub> H <sub>40</sub> N <sub>2</sub> O <sub>6</sub> ) <sub>0.75</sub><br>(C <sub>36</sub> H <sub>39</sub> N <sub>2</sub> O <sub>7</sub> ) <sub>0.25</sub> |
| <i>M</i>                                   | 350.38                                          | 566.63                                                        | 365.41                                          | 600.45                                                                                                                                                               |
| Crystal System                             | monoclinic                                      | monoclinic                                                    | triclinic                                       | Monoclinic                                                                                                                                                           |
| Space Group                                | <i>P</i> 2 <sub>1</sub> / <i>c</i>              | <i>P</i> 2 <sub>1</sub>                                       | <i>P</i>                                        | <i>P</i> 2 <sub>1</sub> / <i>c</i>                                                                                                                                   |
| <i>a</i> / Å                               | 6.8730(14)                                      | 8.6810(17)                                                    | 5.8355(2)                                       | 10.664(2)                                                                                                                                                            |
| <i>b</i> / Å                               | 20.799(4)                                       | 20.795(4)                                                     | 11.8125(5)                                      | 34.087(7)                                                                                                                                                            |
| <i>c</i> / Å                               | 12.761(3)                                       | 17.362(4)                                                     | 14.5365(6)                                      | 8.8880(18)                                                                                                                                                           |
| $\alpha$ / °                               |                                                 |                                                               | 110.197(4)                                      |                                                                                                                                                                      |
| $\beta$ / °                                | 104.29(3)                                       | 91.30(3)                                                      | 96.116(3)                                       | 94.83(3)                                                                                                                                                             |
| $\gamma$ / °                               |                                                 |                                                               | 91.402(3)                                       |                                                                                                                                                                      |
| <i>V</i> / Å <sup>3</sup>                  | 1767.8(7)                                       | 3133.4(11)                                                    | 933.04(7)                                       | 3219.4(11)                                                                                                                                                           |
| <i>D</i> <sub>c</sub> / g cm <sup>-3</sup> | 1.316                                           | 1.201                                                         | 1.301                                           | 1.239                                                                                                                                                                |
| <i>Z</i>                                   | 4                                               | 4                                                             | 2                                               | 4                                                                                                                                                                    |
| Size / mm                                  | 0.1 × 0.1 × 0.1                                 | 0.05 × 0.05 × 0.05                                            | 0.13 × 0.11 × 0.05                              | 0.05 × 0.05 × 0.05                                                                                                                                                   |
| Colour                                     | yellow                                          | colourless                                                    | yellow                                          | yellow                                                                                                                                                               |
| Crystal Habit                              | block                                           | prism                                                         | block                                           | prism                                                                                                                                                                |
| Temperature / K                            | 100(2)                                          | 100(2)                                                        | 150(2)                                          | 100(2)                                                                                                                                                               |
| $\lambda$ / Å                              | 0.7108                                          | 0.7108                                                        | 0.71073                                         | 0.7108                                                                                                                                                               |
| $\mu$ / mm <sup>-1</sup>                   | 0.091                                           | 0.083                                                         | 0.089                                           | 0.085                                                                                                                                                                |
| <i>T</i> <sub>min,max</sub>                |                                                 |                                                               | 0.66857, 1.00000                                |                                                                                                                                                                      |
| 2 $\theta$ <sub>max</sub> / °              | 64.42                                           | 50.2                                                          | 66.36                                           | 56.56                                                                                                                                                                |
| <i>hkl</i> range                           | -9 9, -29 29, -18 19                            | -10 10, -24 24, -20 20                                        | -8 8, -17 17, -21 20                            | -14 14, -45 45, -11 11                                                                                                                                               |
| <i>N</i>                                   | 31161                                           | 34216                                                         | 21417                                           | 50607                                                                                                                                                                |

|                                                                                                                                                                                                                                                                                                              |                |                |                |                |
|--------------------------------------------------------------------------------------------------------------------------------------------------------------------------------------------------------------------------------------------------------------------------------------------------------------|----------------|----------------|----------------|----------------|
| $N_{\text{ind}} (R_{\text{merge}})$                                                                                                                                                                                                                                                                          | 5232(0.0312)   | 10534(0.0635)  | 5749(0.0489)   | 7954(0.0312)   |
| $N_{\text{obs}} / (I > 2\sigma(I))$                                                                                                                                                                                                                                                                          | 4565           | 9046           | 4462           | 7441           |
| $N_{\text{var}}$                                                                                                                                                                                                                                                                                             | 240            | 768            | 250            | 418            |
| $R1(F)^a, wR2(F2)^a$                                                                                                                                                                                                                                                                                         | 0.0649, 0.2021 | 0.0801, 0.2280 | 0.0483, 0.1327 | 0.0623, 0.1762 |
| GoF(all)                                                                                                                                                                                                                                                                                                     | 1.138          | 1.037          | 1.07           | 1.057          |
| $\Delta\rho_{\text{min,max}} / e^- \text{ \AA}^{-3}$                                                                                                                                                                                                                                                         | -0.260, 0.748  | -0.468, 0.590  | -0.259, 0.349  | -0.801, 0.860  |
| <sup>a</sup> Reflections with $[I > 2\sigma(I)]$ considered observed. $R1 = \sum  F_o  -  F_c  / \sum  F_o $ for $F_o > 2\sigma(F_o)$<br>and $wR2_{\text{(all)}} = \{\sum [w(F_o^2 - F_c^2)^2] / \sum [w(F_c^2)^2]\}^{1/2}$ , where $w = 1 / [\sigma^2(F_o^2) + (AP)^2 + BP]$ , $P = (F_o^2 + 2F_c^2) / 3$ . |                |                |                |                |

Cyclic voltammograms of 5-OH Flavone and 5-OH-3-Benzoyl flavone series

### Cyclic Voltammogram of Flavone Series

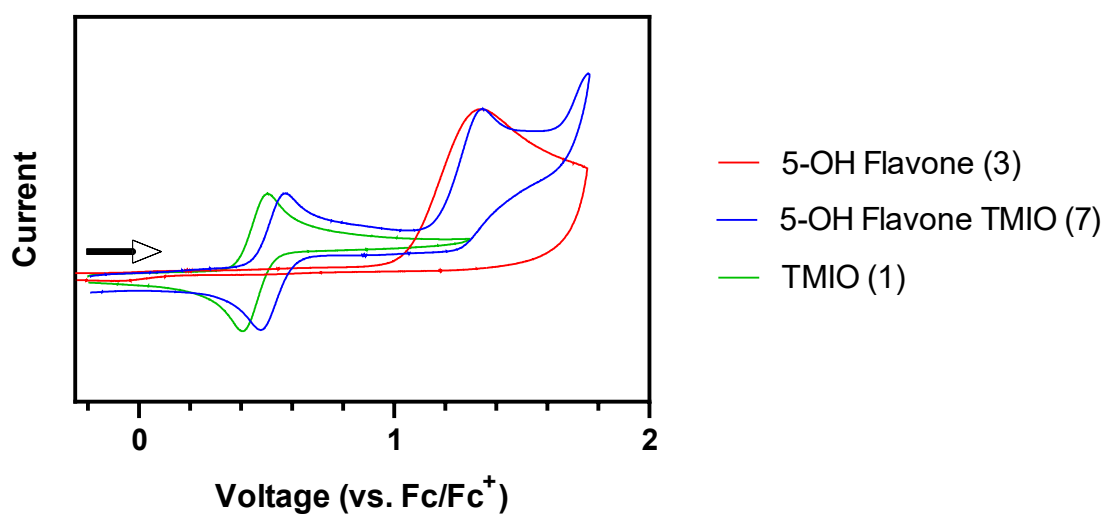

### Cyclic Voltammograms of 5-OH-Benzoyl Flavone Series

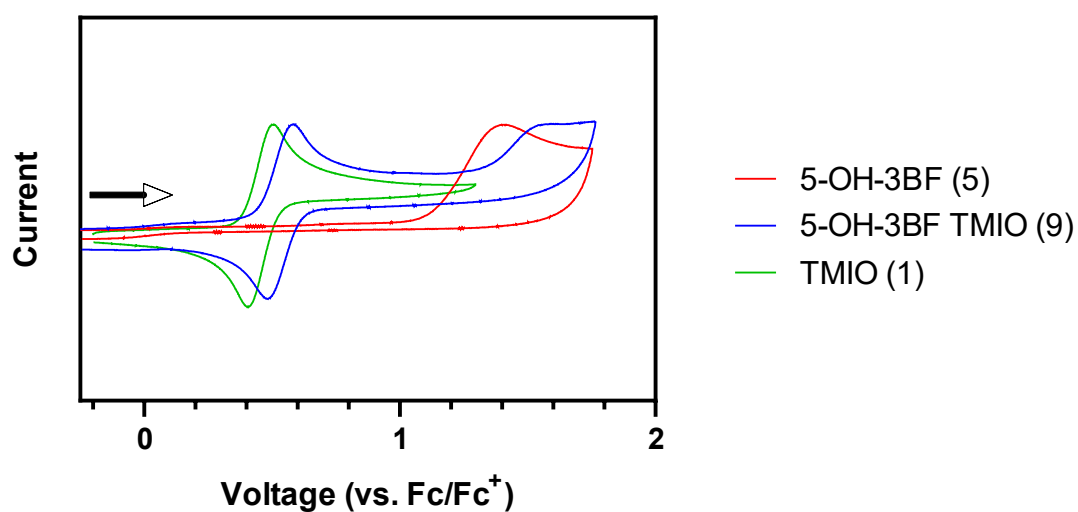

Figure S51: Cyclic Voltammograms of TMIO (1), hydroxylated flavones (3, 5) and hydroxylated flavone hybrids (7, 9) in ACN and Bu<sub>4</sub>NPF<sub>6</sub> as supporting electrolyte. Voltammograms measured at a scan rate of 100 mV/s in the range of -0.5 – 2 V (vs. Ag/AgCl) and referenced to ferrocene/ferrocenium redox couple as internal standard. Current normalised between samples.

# Oxygen Radical Antioxidant Capacity (ORAC) Data

## Positive Controls

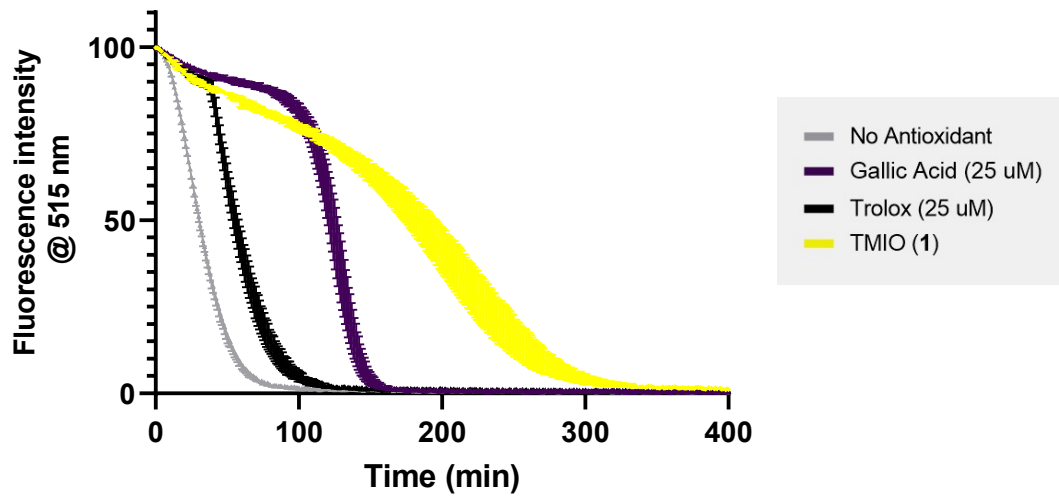

## Flavone Series

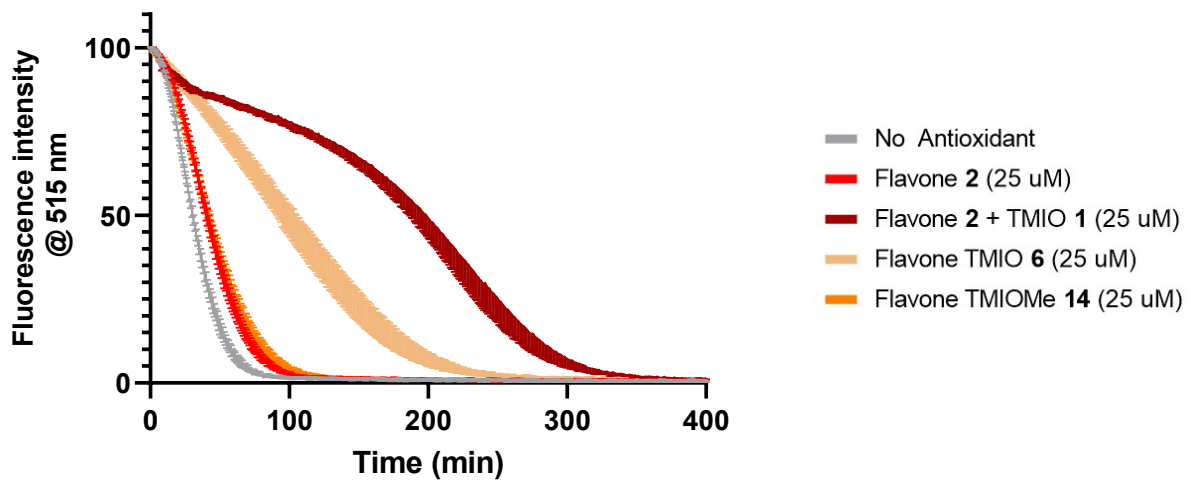

### 3-Benzoyl Flavone Series

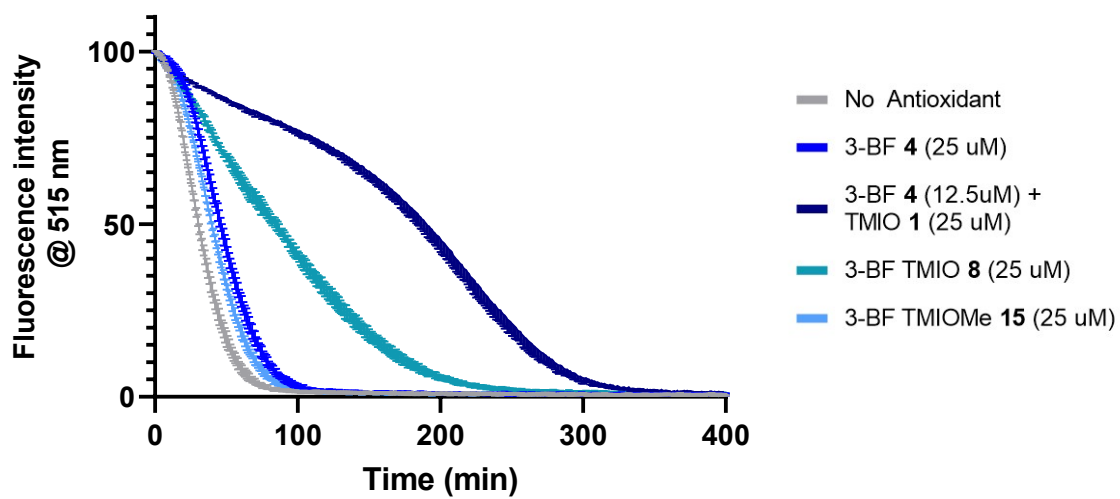

### 5-OH Flavone Series

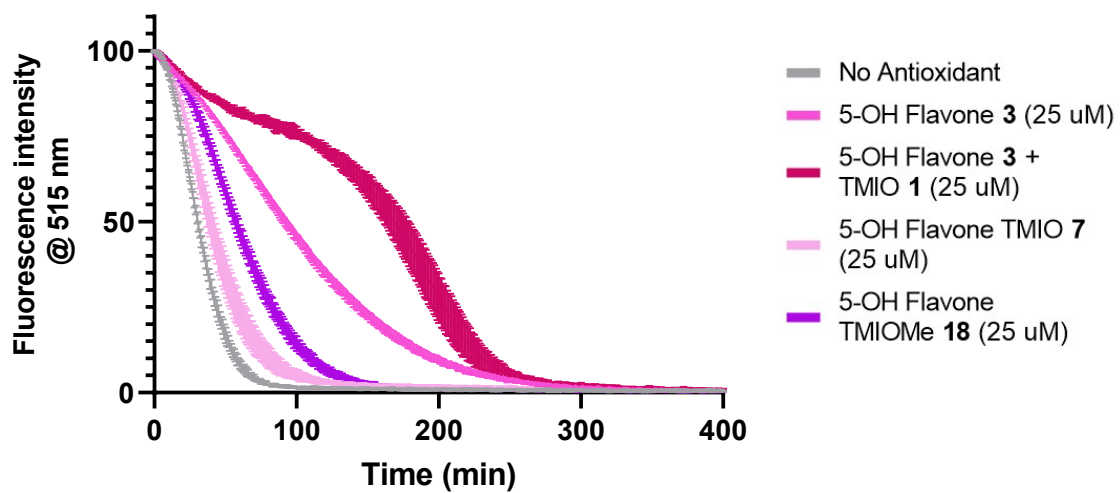



### 5-OH-3-Benzoyl Flavone Series

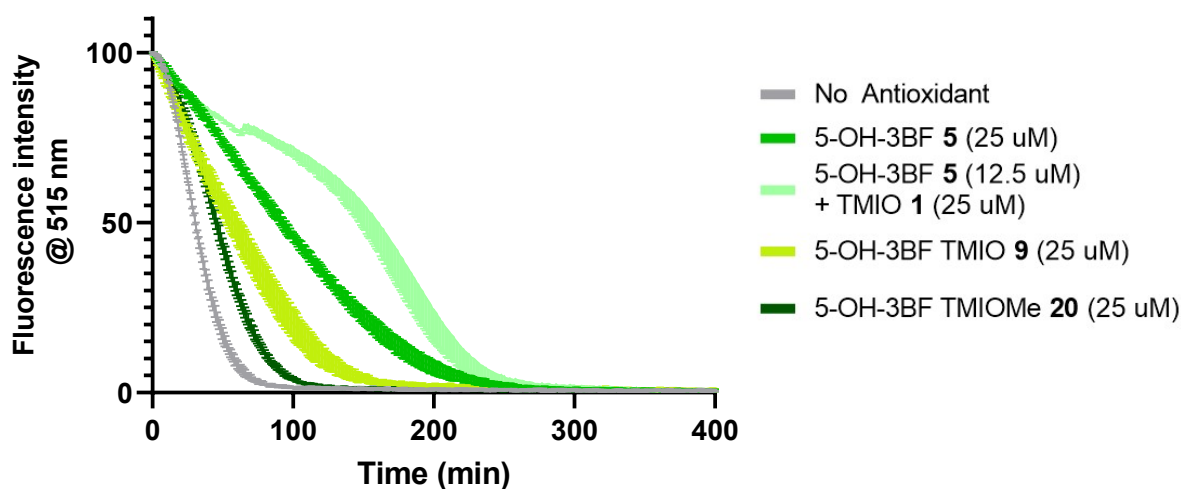

Figure S52: Fluorescence decay curves of samples in quadruplicate show as a fitted line including error bars of standard deviation at each time point. Samples include positive controls (Trolox, gallic acid and TMIO 1), flavone series (2, 6, 13 and 2+1), 3-benzoyl flavone series (4, 8, 15, and 4+1), 5-OH flavone series (3, 7, 18, and 3+1) and 5-OH-3-benzoyl flavone series (5, 9, 20 and 5+1), compared to no antioxidant in the ORAC Assay.

Table S2: Area under the curve (AUC) and standard deviation (SD) of the quadruplicate fluorescence decay curve of each antioxidant sample in the ORAC assay. Net AUC =  $AUC_{\text{Sample}} - AUC_{\text{No antioxidant}}$

| Compound                    | AUC   | SD   | Net AUC | Net SD |
|-----------------------------|-------|------|---------|--------|
| No Antioxidant              | 3631  | 193  | 0       | -      |
| Trolox                      | 6074  | 528  | 2443    | 562    |
| Gallic Acid                 | 11532 | 778  | 7901    | 802    |
| TMIO (1)                    | 17029 | 1022 | 13398   | 1040   |
| Flavone (2)                 | 4681  | 257  | 1050    | 321    |
| Flavone TMIOMe (14)         | 4851  | 304  | 1220    | 390    |
| Flavone (2) + TMIO (1)      | 18215 | 1161 | 14584   | 1177   |
| Flavone TMIO (6)            | 10437 | 765  | 6806    | 790    |
| 3-BF (4)                    | 5131  | 263  | 1500    | 326    |
| 3-BF TMIOMe (15)            | 4513  | 173  | 882     | 259    |
| 3-BF (4) + TMIO (1)         | 17658 | 613  | 14027   | 642    |
| 3-BF TMIO (9)               | 9434  | 312  | 5803    | 367    |
| 5-OH flavone (3)            | 10757 | 510  | 7126    | 545    |
| 5-OH Flavone TMIOMe (18)    | 6470  | 339  | 2839    | 326    |
| 5-OH Flavone (3) + TMIO (1) | 15285 | 882  | 11654   | 642    |
| 5-OH Flavone TMIO (7)       | 4876  | 765  | 7126    | 611    |
| 5-OH BF (5)                 | 10130 | 415  | 6499    | 458    |
| 5-OH BF TMIOMe (20)         | 5070  | 282  | 1439    | 342    |
| 5-OH BF (5) + TMIO (1)      | 14497 | 1366 | 10866   | 1380   |
| 5-OH BF TMIO (9)            | 6641  | 669  | 3010    | 696    |

ORAC assay followed by EPR and fluorescence spectroscopy

ORAC Fluorescence/EPR

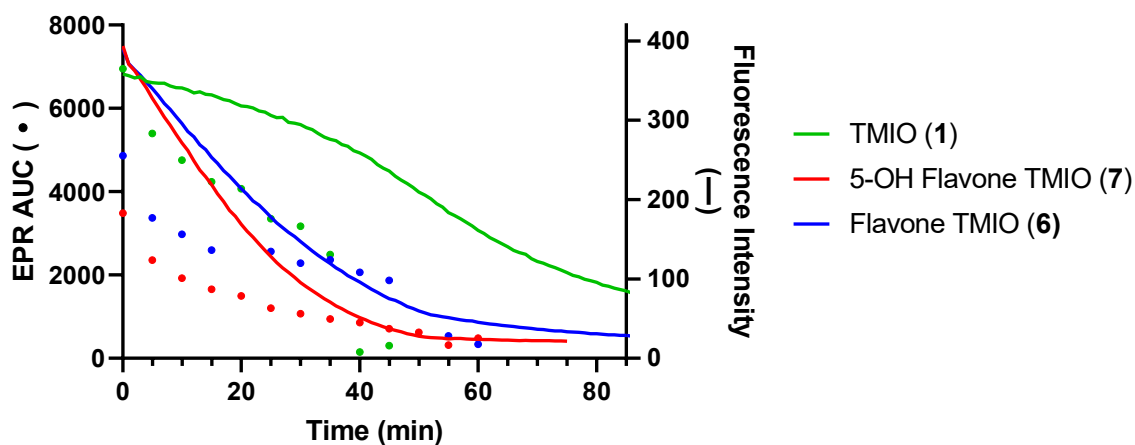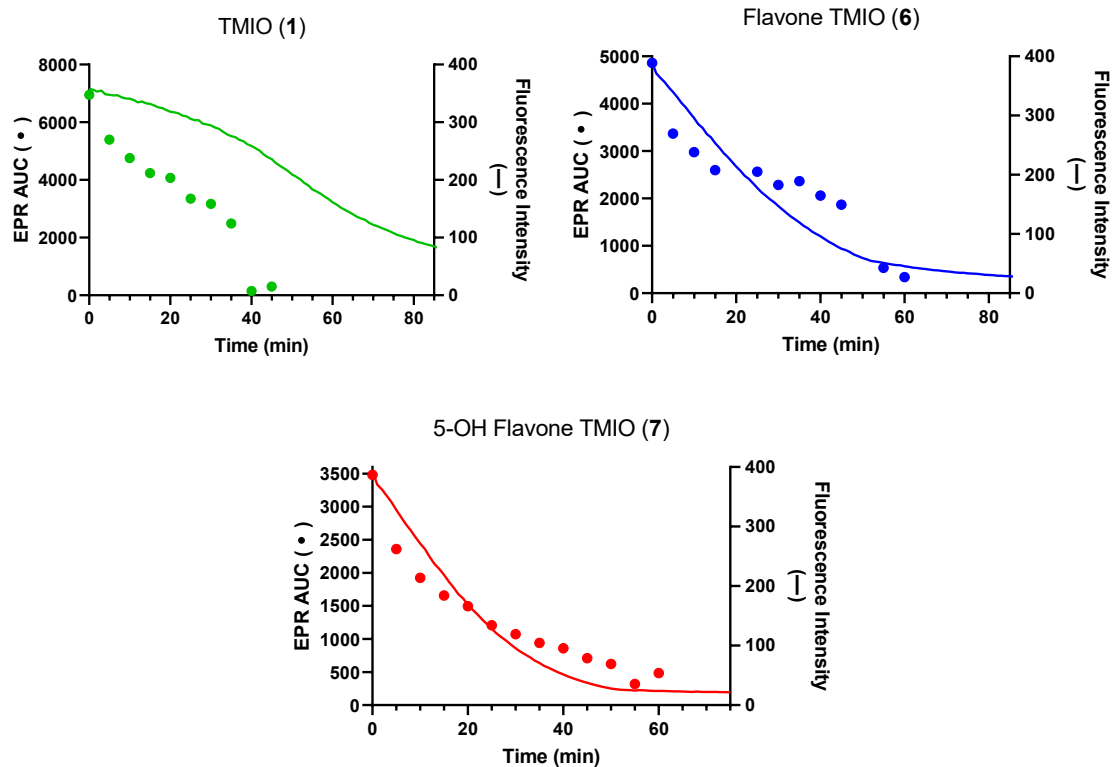

Figure S53: Scaled up ORAC assay measured by both fluorescence and EPR for 25  $\mu\text{M}$  samples of TMIO (1), Flavone TMIO (6) and 5-OH Flavone TMIO (7). Double integral of the EPR spectra at 5-minute time points were taken and graphed on the left Y axis (dotted lined). Fluorescence intensity ( $\lambda_{\text{ex}} = 485 \text{ nm}$ ,  $\lambda_{\text{em}} = 515 \text{ nm}$ ) was measured every minute and graphed on the right Y axis (solid line).

EPR spectra of compounds (1, 6 and 7) in various solvents

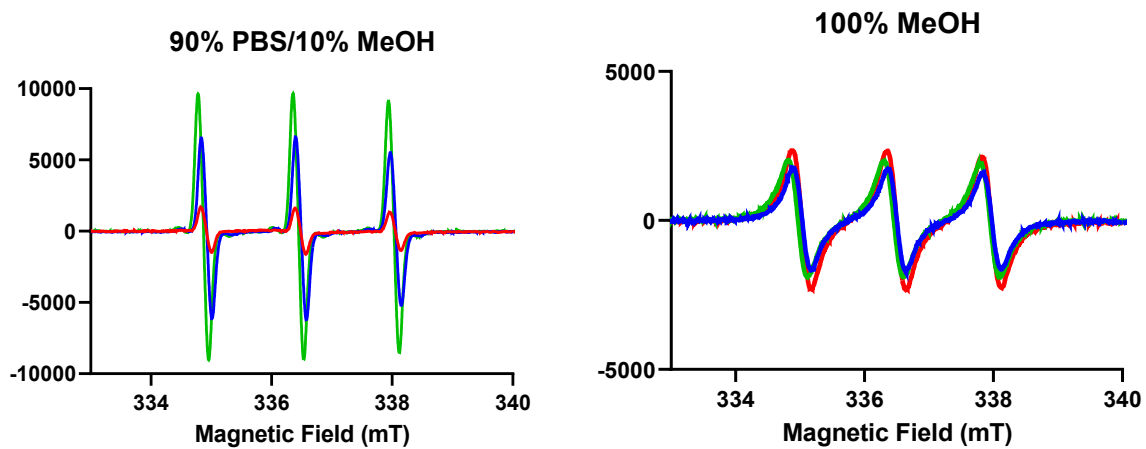

Figure S54: EPR spectra of TMIO 1 (green), Flavone – TMIO 6 (blue) and 5-OH Flavone TMIO 7 (red) (all 25  $\mu$ M) in various solvents (T = 298 K)

Table S3: Double integral of EPR spectra of TMIO 1, Flavone – TMIO 6 and 5-OH Flavone TMIO 7 in various solvents (25  $\mu$ M)

| Compound              | 90% PBS/10% MeOH | 100% MeOH |
|-----------------------|------------------|-----------|
| TMIO (1)              | 7204             | 4007      |
| Flavone-TMIO (6)      | 4951             | 3324      |
| 5-OH Flavone TMIO (7) | 1443             | 4597      |

## References

1. Aragao, D. et al. MX2: a high-flux undulator microfocus beamline serving both the chemical and macromolecular crystallography communities at the Australian Synchrotron. *J Synchrotron Radiat* **2018**, *25*, 885-891.
2. AS QEGui (<https://qtetpics.github.io/>, 2019).
3. Kabsch, W. Automatic processing of rotation diffraction data from crystals of initially unknown symmetry and cell constants. *J. Appl. Cryst.* **1993**, *26*, 795-800.
4. *CrysAlisPro*; Agilent: Yarnton, Oxfordshire, England, **2014**.
5. Sheldrick, G. M. SHELXT – Integrated space-group crystal-structure determination. *Acta Crystallogr., Sect. A: Found. Adv.* **2015**, *71*, 3– 8, DOI: 10.1107/S2053273314026370
6. Sheldrick, G. M. A short history of SHELX. *Acta Crystallogr., Sect. A: Found. Crystallogr.* **2008**, *64*, 112– 122, DOI: 10.1107/S0108767307043930
7. Dolomanov, O. V.; Bourhis, L. J.; Gildea, J. A.; Howard, J. A. K.; Puschmann, H. OLEX2: a complete structure solution, refinement and analysis program. *J. Appl. Crystallogr.* **2009**, *42*, 339– 341, DOI: 10.1107/S0021889808042726
